1 **Title:**

2 Red blood cells protect oxygen transport with adrenergic sodium-proton exchangers in  
3 hypoxic and hypercapnic white seabass

4  
5 **Running title:**

6 Active protection of red blood cell pH

7 **Authors:**

8 Till S. Harter\*, Alexander M. Clifford and Martin Tresguerres\*

9 **Affiliations:**

10 Marine Biology Research Division, Scripps Institution of Oceanography, University of  
11 California San Diego, La Jolla, CA 92093, USA

12 \*corresponding authors: [tharter@ucsd.edu](mailto:tharter@ucsd.edu); [mtresguerres@ucsd.edu](mailto:mtresguerres@ucsd.edu)

13 **Keywords:**

14  $\beta$ -NHE, Slc9a1b, carbon dioxide, haemoglobin, red tide, Bohr effect, Root effect, fish

15 **Summary Statement:**

16 White seabass have highly pH-sensitive haemoglobins, but their red blood cells can  
17 actively protect oxygen transport during hypoxia and hypercapnia, conditions that occur more  
18 frequently due to a changing climate.

19

20 **Abstract:**

21 White seabass (*Atractoscion nobilis*) are increasingly experiencing periods of low oxygen  
22 ( $O_2$ ; hypoxia) and high carbon dioxide ( $CO_2$ , hypercapnia) due to climate change and  
23 eutrophication of the coastal waters of California. Haemoglobin (Hb) is the principal  $O_2$  carrier  
24 in the blood and in many teleost fishes Hb- $O_2$  binding is compromised at low pH. However, Hb  
25 is contained within red blood cells (RBC) that, in some species, regulate intracellular pH with  
26 adrenergically-stimulated sodium-proton-exchangers ( $\beta$ -NHE). We hypothesised that white  
27 seabass have RBC  $\beta$ -NHEs that protect the blood  $O_2$ -carrying capacity during hypoxia and  
28 hypercapnia. In a series of *in vitro* experiments, we determined the  $O_2$ -binding characteristics of  
29 white seabass blood, the response of RBCs to adrenergic stimulation, and quantified the  
30 protective effect of  $\beta$ -NHE activity on Hb- $O_2$  saturation during a hypercapnic acidosis in  
31 normoxia and hypoxia. White seabass had typical teleost Hb characteristics, with a moderate  $O_2$   
32 affinity that was highly pH-sensitive. Functional, molecular and bioinformatic data confirmed  
33 that white seabass have RBC  $\beta$ -NHEs, and super-resolution imaging revealed, for the first time,  
34 the subcellular location of  $\beta$ -NHE protein in intracellular vesicles and on the RBC membrane.  
35 The activation of RBC  $\beta$ -NHEs increased Hb- $O_2$  saturation by ~8% in normoxia at 1%  $PCO_2$ ,  
36 and by ~20% in hypoxia at arterial  $PCO_2$  (0.3%), but the protective effects decreased at higher  
37  $PCO_2$ . Combined, these data indicate that RBC  $\beta$ -NHE activity in white seabass can safeguard  
38 arterial  $O_2$  transport and the mechanism likely plays an important role in the fishes' physiological  
39 response to environmental hypoxia and hypercapnia.

## 40 **Introduction**

41 White seabass (*Atractoscion nobilis*), a teleost fish species endemic to the coastal waters  
42 of California, are apex-predators with ecological significance, sought-after targets of recreational  
43 and commercial fisheries and are gaining importance in aquaculture. Their natural habitat along  
44 the kelp forests of the north-eastern Pacific is subject to strong seasonal fluctuations in water  
45 chemistry, due to the upwelling of deeper waters that are often depleted of oxygen (O<sub>2</sub>; hypoxia),  
46 have a high carbon dioxide tension (CO<sub>2</sub>; hypercapnia) and thus, a low pH (Frieder et al., 2012).  
47 In addition, a steadily warming climate and growing anthropogenic nutrient loading are  
48 increasing the frequency of large algae blooms (“red tides”) in California’s coastal waters (Van  
49 Dolah, F M, 2000). When these algae blooms wane, the microbial decomposition of their  
50 biomass, consumes O<sub>2</sub> and produces CO<sub>2</sub> and other toxic and acidic by-products of biological  
51 decay, such as hydrogen sulfide, altogether creating large hypoxic and hypercapnic zones (Diaz  
52 and Rosenberg, 2008). Species that are highly mobile may be able to avoid these areas, but for  
53 many sedentary species, survival will depend on enduring these conditions. Climate change at  
54 large is also leading to more hypoxic and acidic oceans and, over generations, some species may  
55 adapt to cope with their altered habitats (Harley et al., 2006). However, the reoccurrence of  
56 upwelling and severe algae blooms may acutely expose animals to conditions that far exceed  
57 worst-case predictions for the end of the century, creating strong selective pressures for hypoxia  
58 and hypercapnia tolerance and perhaps overwhelming the rates at which some species can adapt  
59 to climate change.

60 The most recent severe red tide in Southern California occurred in April-May of 2020,  
61 when the water measurements at the pier of the Scripps Institution of Oceanography (SIO) in La  
62 Jolla (CA, USA) revealed average daily dissolved O<sub>2</sub> levels of <2 mg l<sup>-1</sup> and pH as low as 7.06  
63 (Clements et al, 2020). At a water temperature of 17°C and 35 ppt salinity, these values  
64 correspond to 5.3% PO<sub>2</sub> (or 40 mmHg; Boutilier et al., 1984) and 1.16% PCO<sub>2</sub> (CO2SYS  
65 software; Lewis and Wallace, 1998). Equally alarming was the prolonged duration of hypoxia,  
66 where for nine consecutive days, water PO<sub>2</sub> was below the threshold (4.6 mg l<sup>-1</sup>) that is  
67 considered lethal for 90% of marine life (Vaquer-Sunyer and Duarte, 2008). The SIO aquatics  
68 facility is supplied with water taken in at the pier, which resulted in hypoxic and hypercapnic  
69 exposures of all research animals, despite every effort to aerate the tanks. However unfortunate,  
70 this natural experiment revealed a remarkable tolerance of white seabass to these adverse water

71 conditions, despite being deprived the behavioural avoidance of hypoxia that may be recruited in  
72 the wild. Therefore, the aim of the present study was to explore the O<sub>2</sub>-transport capacity of  
73 white seabass with a focus on the physiological mechanisms at the level of the red blood cell  
74 (RBC) that may allow these fish to endure severe hypoxia and hypercapnia.

75 For obligate aerobic animals, the challenge to surviving unavoidable environmental  
76 hypoxia is balancing the uptake and delivery of O<sub>2</sub> with its consumption in the mitochondria  
77 (Hughes, 1973). Haemoglobin (Hb) is the principal O<sub>2</sub> carrier in the blood and therefore the  
78 cardiovascular O<sub>2</sub>-carrying capacity is largely determined by the O<sub>2</sub>-binding characteristics of  
79 Hb. As such, a higher Hb-O<sub>2</sub> affinity will favour the extraction of O<sub>2</sub> from hypoxic waters and  
80 thus, a lower Hb P<sub>50</sub> (the partial pressure of O<sub>2</sub> at which Hb is 50% saturated) is typically  
81 associated with hypoxia tolerance in fishes (Jensen and Weber, 1982; Mandic et al., 2009);  
82 however, whether white seabass have high-affinity Hbs that would confer some hypoxia  
83 tolerance is currently unknown.

84 Hb-O<sub>2</sub> binding in teleost fishes is highly pH-sensitive, where a reduction in pH decreases  
85 Hb-O<sub>2</sub> affinity via the Bohr effect (Bohr et al., 1904), and the Root effect prevents Hb from  
86 becoming fully O<sub>2</sub>-saturated at low pH, even at super-atmospheric PO<sub>2</sub> (Root, 1931; Scholander  
87 and Van Dam, 1954). The reduction in Hb-O<sub>2</sub> carrying capacity due to the Root effect is  
88 physiologically significant, as it enhances the unloading of O<sub>2</sub> at the eyes and the swimbladder of  
89 teleosts, where blood is acidified locally (Damsgaard et al., 2020; Pelster, 1997; Wittenberg and  
90 Wittenberg, 1962). In contrast, during a systemic blood acidosis that may occur during exercise  
91 or hypoxia, the pH-sensitive Hbs of teleosts may fail to become fully oxygenated at the gills,  
92 decreasing the O<sub>2</sub>-carrying capacity of arterial blood and leading to hypoxemia at the tissues.  
93 Thus, a combined hypoxic and hypercapnic exposure may be especially dangerous for teleosts,  
94 as a reduced availability of O<sub>2</sub> in the environment is paired with the simultaneous reduction of  
95 Hb-O<sub>2</sub> affinity via the Bohr effect at low pH; however, whether white seabass have pH-sensitive  
96 Hbs is currently unknown.

97 Hb is housed within RBCs that, in teleosts, may prevent systemic hypoxemia by actively  
98 regulating their intracellular pH (pH<sub>i</sub>) to protect Hb-O<sub>2</sub> binding during a reduction in  
99 extracellular pH (pH<sub>e</sub>). In brief, a decrease in arterial PO<sub>2</sub> or pH leads to the release of  
100 catecholamines into the blood (Randall and Perry, 1992; Tetens and Lykkeboe, 1988), which  
101 bind to a β-adrenergic receptor on the RBC membrane and activate a sodium-proton-exchanger

102 ( $\beta$ -NHE, Slc9a1b,) via the cyclic adenosine monophosphate (cAMP) pathway (Mahe et al.,  
103 1985). The extrusion of  $H^+$  by the  $\beta$ -NHE raises  $pH_i$  above the equilibrium condition, which  
104 increases Hb- $O_2$  affinity and will promote the extraction of  $O_2$  from hypoxic waters (Nikinmaa,  
105 1992). The adrenergic stimulation of RBCs also causes an influx of  $Na^+$  and  $Cl^-$  that leads to  
106 osmotic swelling and that has been used as a marker to determine the presence of RBC  $\beta$ -NHEs  
107 in fish species (Rummer et al., 2010; Shu et al., 2017). A broader phylogenetic analysis indicates  
108 that most teleosts, but not other fishes, have RBC  $\beta$ -NHEs (Berenbrink et al., 2005); however,  
109 whether white seabass RBCs have  $\beta$ -NHE activity is currently unknown.

110         Based on these considerations, we hypothesised that white seabass RBCs have  $\beta$ -NHE  
111 activity that will protect the blood  $O_2$ -carrying capacity during hypoxic and hypercapnic  
112 conditions. We tested this hypothesis in a series of *in vitro* experiments and predicted that: i)  
113 white seabass have a high Hb- $O_2$  affinity to maintain  $O_2$  uptake under hypoxic conditions, which  
114 was addressed by generating oxygen equilibrium curves (OEC) over a range of  $PO_2$ ; ii) white  
115 seabass display the large Bohr and Root effects that are typical of teleosts, which was addressed  
116 by generating OECs over a range of  $PCO_2$ , and measuring  $pH_e$  and RBC  $pH_i$ ; iii) white seabass  
117 have a RBC  $\beta$ -NHE, which was addressed using molecular, bioinformatic and  
118 immunocytochemical techniques to establish its presence and localisation, and by measuring  
119 RBC swelling after adrenergic stimulation and the inhibition of NHEs with amiloride; and finally  
120 iv) the adrenergic stimulation of RBC  $\beta$ -NHEs protects the blood  $O_2$ -carrying capacity during an  
121 acidosis and this effect was quantified by measuring Hb- $O_2$  saturation at increasing levels a  
122 hypercapnia in normoxia and hypoxia.

## 123 **Materials and Methods**

### 124 *Animals and husbandry*

125 White seabass (*A. nobilis*, Ayres 1860) were obtained from the Hubbs Sea World  
126 Research Institute (HSWRI, Carlsbad, USA) and were held indoors at the SIO aquatics facility  
127 for several months before experiments. Photoperiod was set to a 12:12 h light-dark cycle and fish  
128 were housed in large fiberglass tanks (~3.5-10 m<sup>3</sup>) supplied with flow-through seawater from an  
129 inshore intake; the average water temperature at the time of experiments was 17°C. Aeration was  
130 provided to ensure normoxic conditions in all tanks (>90% air saturation of O<sub>2</sub>) and these water  
131 parameters were monitored every day. All fish were fed twice a week with commercial dry  
132 pellets (Skretting; Classic Bass 9.5 mm; Stavanger, Norway) and feeding was suspended 48 h  
133 before blood sampling. The white seabass used for the determination of blood O<sub>2</sub>-binding  
134 characteristics had an average weight of 1146±96 g (*N* = 8), while those used for the β-NHE  
135 experiments had an average weight of 357±27 g (*N* = 6). Animal husbandry and all experimental  
136 procedures were in strict compliance with the guidelines by the Institutional Animal Care and  
137 Use Committee (IACUC) and approved by the Animal Care Program at the University of  
138 California San Diego (Protocol no. S10320).

### 139 *Blood sampling*

140 White seabass were moved individually into darkened boxes supplied with air and flow-  
141 through seawater, 24 h prior to blood sampling. The next day the water supply was shut off and  
142 the fish were anaesthetized by carefully pouring a diluted benzocaine solution (Fisher Scientific,  
143 Acros 150785000; Waltham, USA; concentrated stock made up in ethanol) into the box without  
144 disturbing the fish, for a final concentrations of 70 mg l<sup>-1</sup> benzocaine (<0.001% ethanol). After  
145 visible loss of equilibrium, fish were transferred to a surgery table, positioned ventral-side-up  
146 and their gills were perfused with water containing a maintenance dose of anaesthetic (30 mg l<sup>-1</sup>  
147 benzocaine). Blood sampling was by caudal puncture and 3 ml of blood were collected into a  
148 heparinized syringe. This procedure ensured minimal disturbance of the fish (Montgomery et al.,  
149 2019), which can decrease blood pH due to air-exposure (respiratory acidosis) and due to  
150 anaerobic muscle contractions during struggling (metabolic acidosis). After sampling, the fish  
151 were recovered and returned to their holding tank, and each individual was only sampled once.  
152 In the lab, the blood was centrifuged at 500 *g* for 3 min to separate the plasma from the blood  
153 cells. The plasma was collected in a bullet tube and stored over-night at 4°C. To remove any

154 catecholamines released during sampling, the blood cells were rinsed three times in cold  
155 Cortland's saline (in mM: NaCl 147, KCl 5.1, CaCl 1.6, MgSO<sub>4</sub> 0.9, NaHCO<sub>3</sub> 11.9, NaH<sub>2</sub>PO<sub>4</sub> 3,  
156 glucose 5.6; adjusted to the measured plasma osmolality in white seabass of 345 mOsm and pH  
157 7.8) and the buffy coat was aspirated generously to remove white blood cells and platelets.  
158 Finally, the pellet was re-suspended in 10 volumes of fresh saline to allow the RBCs to return to  
159 a resting state and stored aerobically on a tilt-shaker, over-night, at 17°C (Caldwell et al., 2006).

#### 160 *Blood O<sub>2</sub>-binding characteristics*

161 The next day, RBCs were rinsed with saline three times and re-suspended in their native  
162 plasma at a haematocrit of 5%; this value was chosen based on preliminary trials and yields an  
163 optic density that allows for spectrophotometric measurements of Hb-O<sub>2</sub> binding characteristics  
164 (~0.6 mM Hb). A volume of 1.4 ml of blood was loaded into a glass tonometer at 17°C and  
165 equilibrated to arterial gas tensions (21% PO<sub>2</sub>, 0.3% PCO<sub>2</sub> in N<sub>2</sub>) from a custom-mixed gas  
166 cylinder (Praxair; Danbury, USA). After one hour, 2 µl of blood were removed from the  
167 tonometer and loaded into the diffusion chamber of a spectrophotometric blood analyser (BOBS,  
168 Loligo Systems; Viborg, Denmark). The samples were equilibrated to increasing PO<sub>2</sub> tensions  
169 (0.5, 1, 2, 4, 8, 16 and 21% PO<sub>2</sub>) from a gas mixing system (GMS, Loligo), in two-minute  
170 equilibration steps and the absorbance was recorded once every second at 190-885 nm. At the  
171 beginning and end of each run, the sample was equilibrated to high (99.7% O<sub>2</sub>, 0.3% CO<sub>2</sub> in N<sub>2</sub>  
172 for 8 min) and low (0% O<sub>2</sub>, 0.3% CO<sub>2</sub> in N<sub>2</sub> for 8 min) PO<sub>2</sub> conditions; for the calculation of Hb-  
173 O<sub>2</sub> saturation from raw absorbance values, it was assumed that Hb was fully oxygenated or  
174 deoxygenated under the two conditions, respectively. A PCO<sub>2</sub> of 0.3% was maintained  
175 throughout these trials to prevent RBC pH<sub>i</sub> from increasing above physiologically relevant levels  
176 and this value was chosen to match that measured in the arterial blood of rainbow trout  
177 (*Oncorhynchus mykiss*) *in vivo* (Brauner et al., 2000a). All custom gas mixtures were validated  
178 by measuring PO<sub>2</sub> with an FC-2 Oxzilla and PCO<sub>2</sub> with a CA-10 CO<sub>2</sub> analyser (Sable Systems,  
179 North Las Vegas, USA) that were calibrated daily against high purity N<sub>2</sub>, air, or 5% CO<sub>2</sub> in air.

180 An additional 250 µl of blood were removed from the tonometer to measure blood  
181 parameters as follows. Haematocrit (Hct) was measured in triplicate in microcapillary tubes  
182 (Drummond Microcaps, 15 µl; Parkway, USA), after centrifuging at 10,000 g for 3 min. Hb was  
183 measured in triplicate using the cyano-methaemoglobin method (Sigma-Aldrich Drabkin's  
184 D5941; St. Louis, USA) and an extinction coefficient of 10.99 mmol cm<sup>-1</sup> (van Kampen and

185 Zijlstra, 1983). Blood pH was measured with a thermostatted microcapillary electrode at 17°C  
186 (Fisher Accumet 13-620-850; Hampton, USA; with Denver Instruments UB-10 meter; Bohemia,  
187 USA), calibrated daily against precision pH buffers (Radiometer S11M007, S1M004 and  
188 S11M002; Copenhagen, Denmark). Thereafter, the blood was centrifuged to separate plasma and  
189 RBCs and total CO<sub>2</sub> content (TCO<sub>2</sub>) of the plasma was measured in triplicate with a Corning 965  
190 (Midland, USA). The RBCs in the pellet were lysed by three freeze-thaw cycles in liquid  
191 nitrogen and pH<sub>i</sub> was measured in the lysate as described for pH<sub>e</sub> (Zeidler and Kim, 1977). After  
192 completing these measurements, the PCO<sub>2</sub> in the tonometer was increased in steps from 0.3 to  
193 2.5% and, each time, OECs and blood parameters were measured as described above.

#### 194 *RBC swelling after β-adrenergic stimulation*

195 After storage of blood samples over-night in saline, the RBCs were rinsed three times in  
196 fresh saline and re-suspended in their native plasma at a Hct of 25%. A volume of 1.8 ml was  
197 loaded into a tonometer and equilibrated to 3% PO<sub>2</sub> and 1% PCO<sub>2</sub> in N<sub>2</sub> at 17°C for one hour;  
198 similar hypoxic and acidotic conditions have been shown to promote β-NHE activity in other  
199 teleost species (Motais et al., 1987; Salama and Nikinmaa, 1989). After one hour, an initial  
200 subsample of blood was taken and Hct, Hb, pH<sub>e</sub> and pH<sub>i</sub> were measured as described above.  
201 Thereafter, the blood was split into aliquots of 600 µl that were loaded into individual  
202 tonometers and treated with either: i) a carrier control (0.25% dimethyl sulfoxide, DMSO; VWR  
203 BDH 1115; Radnor, USA), ii) the β-adrenergic agonist isoproterenol (ISO; Sigma I6504; 10 µM  
204 final concentration, which stimulates maximal β-NHE activity in rainbow trout; Tetens and  
205 Lykkeboe, 1988), or iii) ISO plus the NHE inhibitor amiloride (ISO+Am; Sigma A7410; 1 mM,  
206 according to Borgese et al., 1992). These treatments were staggered so that samples from each  
207 tonometer could be taken for the measurements of blood parameters at 10, 30 and 60 mins after  
208 drug additions.

209 To collect RBC samples for immunocytochemistry, the above tonometry trial was  
210 repeated ( $N = 2$ ) with RBCs that were suspended in saline instead of plasma; this step was  
211 necessary as initial trials showed that plasma proteins interfered with the quality of cell fixations.  
212 Subsamples were removed from individual tonometers at the initial and 60 min time points. A  
213 volume of 60 µl was immediately re-suspended in 1.5 ml ice-cold fixative (3%  
214 paraformaldehyde, 0.175 % glutaraldehyde in 0.6 x phosphate buffered saline with 0.05 M  
215 sodium cacodylate buffer; made up from Electron Microscopy Sciences RT15949, Hatfield,



216 USA) and incubated for 60 min on a revolver rotator at 4°C. After fixation, cells were washed  
217 three times in 1 x phosphate Buffered Saline (PBS, Corning 46-013-CM, Corning, USA) and  
218 stored at 4°C for processing. An additional subsample of 100 µl was removed from the  
219 tonometers and centrifuged to remove the saline. The RBC pellet was re-suspended in 5 volumes  
220 of lysis buffer containing 1 mM DL-Dithiothreitol (DTT; Thermo Fisher R0861; Waltham,  
221 USA), 1 mM phenylmethylsulfonyl fluoride (PMSF; Sigma P7626) and 10 mM benzamidine  
222 hydrochloride hydrate (BHH; Sigma B6506) in PBS. The RBCs were lysed by three cycles of  
223 freeze-thawing in liquid nitrogen, the lysate was centrifuged at 500 g for 10 min at 4°C and the  
224 supernatant was frozen at -80°C for Western blot processing.

#### 225 *Hb-O<sub>2</sub> binding after β-adrenergic stimulation*

226 An additional aliquot of RBCs was re-suspended in native plasma at a Hct of 5%.  
227 Volumes of 300 µl were loaded into one of four tonometers and equilibrated to arterial gas  
228 tensions at 17°C (as described previously) and treated with either: i) a carrier control (DMSO;  
229 0.25%), ii) ISO (10 µM), or iii) ISO+Am (1 mM). These treatments were staggered to allow for  
230 standardised measurements at 60 min after drug additions, when 2 µl of blood were removed  
231 from the tonometer and loaded into the BOBS for real-time measurements of Hb-O<sub>2</sub> saturation  
232 during a respiratory acidosis. Therefore, the blood was exposed to stepwise increases in PCO<sub>2</sub>  
233 (0.3, 0.5, 1, 1.5, 2 and 3%) allowing for two minutes of equilibration at each step; preliminary  
234 trials showed full equilibration to the new PCO<sub>2</sub> after ~1 min and absorbance remained constant  
235 thereafter. As described previously, this protocol also included initial and final calibration steps,  
236 at which the sample was fully O<sub>2</sub>-saturated and then desaturated. A first trial was performed in  
237 normoxia (21% PO<sub>2</sub>) and then a second sample was loaded from the same tonometer for an  
238 additional run under hypoxic conditions (3% PO<sub>2</sub>). The PO<sub>2</sub> value in these hypoxic runs was  
239 chosen to yield a Hb-O<sub>2</sub> saturation close to P<sub>50</sub> and was informed from the previous  
240 measurements of Hb-O<sub>2</sub> binding characteristics. Finally, 250 µl of blood were removed from the  
241 tonometer for the measurement of blood parameters, as described previously.

#### 242 *Subcellular localisation of RBC β-NHE*

243 Fixed RBCs were permeabilized in 1.5 ml 0.1% triton-X100 (VWR Amresco 1421C243)  
244 in PBS for 15 min at room temperature on a revolver rotator. Thereafter, the RBCs were blocked  
245 for auto-fluorescence in 100 mM glycine in PBS for 15 min, after which the cells were rinsed  
246 three times in PBS. For immunocytochemistry, 200 µl of these fixed RBCs were re-suspended in

247 a blocking buffer containing 3% bovine serum albumin (VWR 0332) and 1% normal goat serum  
248 (Lampire Biological Laboratories 7332500; Pipersville, USA) in PBS and incubated for six  
249 hours on a rotator. Primary antibodies were added directly into the blocking buffer and incubated  
250 on a rotator over-night at 4°C. A monoclonal mouse anti-*Tetrahymena*  $\alpha$ -tubulin antibody  
251 (deposited by Frankel, J. and Nelsen, E.M at the Developmental Studies Hybridoma Bank,  
252 DSHB12G10; Iowa City, USA) was used at 0.24  $\mu\text{g ml}^{-1}$  and a custom, polyclonal, affinity-  
253 purified, rabbit anti-rainbow trout  $\beta$ -NHE (epitope: MERRVSVMERMSH) was used at 0.02  
254  $\mu\text{g ml}^{-1}$ . After primary incubations the RBCs were washed three times in PBS and incubated for  
255 three hours on a rotator at room temperature in blocking buffer containing secondary antibodies:  
256 1:500 goat anti-mouse (AlexaFlour 568; Thermo Fisher Life Technologies A-11031), 1:500 goat  
257 anti-rabbit (AlexaFlour 488; A-11008) and 1:1000 4',6-diamidino-2-phenylindole (DAPI; Roche  
258 10236276001; Basel, Switzerland). After secondary incubations, RBCs were washed three times  
259 and were re-suspended in PBS. To validate the  $\beta$ -NHE antibody, controls were performed by  
260 leaving out the primary antibody and by pre-absorbing the primary antibody with its pre-  
261 immune-peptide. All images were acquired with a confocal laser-scanning fluorescence  
262 microscope (Zeiss Observer Z1 with LSM 800, Oberkochen, Germany) and ZEN blue edition  
263 software v.2.6. For super-resolution imaging the cells were re-suspended in PBS with a mounting  
264 medium (Thermo Fisher Invitrogen ProLong P36980) and acquisition was with the Zeiss  
265 AiryScan detector system. To ensure that images were comparable, the acquisition settings were  
266 kept the same between the different treatments and between treatments and the controls. Optical  
267 sectioning and three-dimensional (3D) reconstructions of single RBCs from the different  
268 treatments were processed with the Imaris software v.9.0. (Oxford Instruments, Abingdon, UK)  
269 and rendered into movies.

#### 270 *Molecular $\beta$ -NHE characterisation*

271 For Western blotting, RBC crude homogenates were thawed and centrifuged at 16,000 g  
272 for one hour at 4°C to obtain a supernatant containing the cytoplasmic fraction and a pellet  
273 containing a membrane-enriched fraction that was re-suspended in 100  $\mu\text{l}$  of lysis buffer. The  
274 protein concentration of all three fractions was measured with the Bradford's assay (BioRad  
275 5000006; Hercules, USA). Samples were mixed 1:1 with Laemmli's sample buffer (BioRad 161-  
276 0737) containing 10% 2-Mercaptoethanol (Sigma M3148) and were heated to 75°C for 15 min.  
277 Sample loading was at 5  $\mu\text{g}$  protein from each fraction for the detection of  $\beta$ -NHE and 60  $\mu\text{g}$

278 protein from crude homogenate for the detection of  $\alpha$ -tubulin, into the lanes of a 5% stacking-  
279 and 10% separating polyacrylamide gel. The proteins were separated at 60 V for 30 min and 150  
280 V until the Hb fraction (~16 kDa) ran out the bottom of the gel (~60 min); previous trials had  
281 shown that the high Hb content of these lysates may bind some antibodies non-specifically. The  
282 proteins were transferred onto a Immun-Blot polyvinylidene difluoride membrane (PVDF;  
283 BioRad) using a semi-dry transfer cell (Bio-Rad Trans-Blot SD) over-night, at 90 mA and 4°C.  
284 PVDF membranes were blocked over-night, on a shaker at 4°C in tris-buffered saline with 1%  
285 tween 20 (TBS-T; VWR Amresco ProPure M147) and 0.1 g ml<sup>-1</sup> skim milk powder (Kroger;  
286 Cincinnati, USA). Primary antibodies were made up in blocking buffer and mixed on a shaker at  
287 4°C, over-night, before applying to the membranes. The anti- $\alpha$  tubulin antibody was used at 4.7  
288 ng ml<sup>-1</sup>, the anti- $\beta$ -NHE antibody at 0.42 ng ml<sup>-1</sup> and controls at a peptide concentration  
289 exceeding that of primary antibody by 10:1. Primary incubations were for four hours on a shaker  
290 at room temperature and membranes were rinsed three times in TBS-T for 5 min. Secondary  
291 incubations were with either an anti-rabbit or mouse, horse-radish peroxidase conjugated  
292 secondary antibody (BioRad 1706515 and 1706516) for three hours on a shaker at room  
293 temperature. Finally, the membranes were rinsed three times in TBS-T for 5 min and the proteins  
294 were visualized by enhanced chemiluminescence (BioRad, Clarity 1705061) in a BioRad  
295 Universal III Hood with Image Lab software v.6.0.1. Protein sizes were determined relative to a  
296 precision dual-colour protein ladder (BioRad 1610374).

297 The white seabass  $\beta$ -NHE sequence was obtained by transcriptomics analysis of gill  
298 samples that were not perfused to remove the blood and these combined gill and RBC tissue  
299 samples were stored in RNA later for processing. Approximately 50  $\mu$ g of sample were  
300 transferred into 1 ml of Trizol reagent (Thermo Fisher 15596026) and were homogenized on ice  
301 with a handheld motorized mortar and pestle (Kimble Kontes, Dusseldorf, Germany). These  
302 crude homogenates were centrifuged at 1000 g for 1 min and the supernatant was collected for  
303 further processing. RNA was extracted in RNA spin columns (RNAEasy Mini; Qiagen, Hilden,  
304 Germany) and treated with DNase I (ezDNase; Thermo Fisher, 11766051) to remove traces of  
305 genomic DNA. RNA quantity was determined by spectrophotometry (Nanodrop 2000; Thermo  
306 Fisher) and RNA integrity was determined with an Agilent 2100 Bioanalyzer (Agilent; Santa  
307 Clara, USA). Poly-A enriched complementary DNA (cDNA) libraries were constructed using the  
308 TruSeq RNA Sample Preparation Kit (Illumina; San Diego, USA). Briefly, mRNA was selected

309 against total RNA using Oligo(dt) magnetic beads and the retained RNA was chemically sheared  
310 into short fragments in a fragmentation buffer, followed by first- and second-stand cDNA  
311 synthesis using random hexamer primers. Illumina adaptor primers (Forward P5-Adaptor,  
312 5'AATGATACGGCGACCACCGAGA3'; Reverse P7-Adaptor 5'  
313 CGTATGCCGTCTTCTGCTTG 3') were then ligated to the synthesized fragments and  
314 subjected to end-repair processing. After agarose gel electrophoresis, 200-300 bp insert  
315 fragments were selected and used as templates for downstream PCR amplification and cDNA  
316 library preparation. The combined gill and RBC samples (1 µg RNA) were sent for RNAseq  
317 Poly-A sequencing with the Illumina NovoSeq™ 6000 platform (Novogene; Beijing, China) and  
318 raw reads are made available on NCBI (PRJNA722314).

319 RNAseq data was used to generate a *de novo* transcriptome assembly which was mined  
320 for white seabass isoforms of the Slc9a1 protein family using methods previously described  
321 (Clifford et al., 2017). Briefly, raw reads were analysed, trimmed of adaptor sequences, and  
322 processed with the OpenGene/fastp software (Chen et al., 2018), to remove reads: i) of low  
323 quality (PHRED quality score < 20), ii) containing >50% unqualified bases (base quality < 5),  
324 and iii) with >10 unknown bases. Any remaining unpaired reads were discarded from  
325 downstream analysis and quality control metrics were carried out before and after trimming (raw  
326 reads 80.07 x 10<sup>6</sup>; raw bases 12.01 Gb; clean reads 79.44 x 10<sup>6</sup>, clean bases 11.84 Gb, clean  
327 reads Q30 95.26%; GC content 46.67%). Thereafter, fastq files were merged into a single data  
328 set, normalized, and used for *de novo* construction of a combined gill and RBC transcriptome  
329 using the Trinity v2.6.6 software. Normalization and assembly were performed using the  
330 NCGAS (National Centre for Genome Analysis Support) *de novo* transcriptome assembly  
331 pipeline ([github.com/NCMAS/de-novo-transcriptome-assembly-](https://github.com/NCMAS/de-novo-transcriptome-assembly-pipeline/tree/master/Project_Carbonate_v4)  
332 [pipeline/tree/master/Project\\_Carbonate\\_v4](https://github.com/NCMAS/de-novo-transcriptome-assembly-pipeline/tree/master/Project_Carbonate_v4)) on the Carbonate High Performance Computing  
333 cluster housed at Indiana University. For assembly, minimum kmer coverage was set to three and  
334 the minimum number of reads needed to glue two inchworm contigs together, was set to four  
335 (Grabherr et al., 2011). The resulting nucleotide FASTA file was translated into six protein  
336 reading frames using BBMap (Bushnell, 2014), which were mined for the NHE-like proteins  
337 using HMMER3 v.3.0 ([hmmer.org](http://hmmer.org)) by querying the *de novo* assembly against a hidden markov  
338 model (HMM) homology matrix generated from 132 aligned protein sequences of the vertebrate  
339 NHE family (slc9a1 – slc9a9; see Table S1 for accession numbers). Sequences were aligned

340 using MUSCLE (Edgar, 2004) in SeaView (Galtier et al., 1996; Gouy et al., 2010), with NHE2  
341 from *Caenorhabditis elegans* as an outgroup and results were refined using GBLOCKS  
342 (Castresana, 2000) according to the parameters specified previously (Talavera and Castresana,  
343 2007). Phylogenetic analysis was conducted on the Cyberinfrastructure for Phylogenetic  
344 Research (CIPRES) Science Gateway (Miller et al., 2010) using the RAxML software v.8.2.12  
345 (Stamatakis, 2014) with the LG evolutionary and GTRGAMMA models (Le and Gascuel, 2008).  
346 Branch support was estimated by bootstraps with 450 replications and the constructed tree was  
347 edited in FigTree v.1.4.4. Finally, the open reading frame of the white seabass  $\beta$ -NHE sequence  
348 (predicted 747 amino acids), was analysed for the presence of the Kozak nucleic acid motifs (5'-  
349 (gcc)gccRccAUGG-3'; Kozak, 1987) immediately upstream of putative start codons, using the  
350 ATGpr software (Nishikawa et al., 2000).

351 To confirm the expression of the  $\beta$ -NHE in the RBCs of white seabass, an additional  
352 blood sample of 1 ml was collected and processed as described previously. RBCs were lysed by  
353 repeatedly passing them through a 23G needle and RNA extraction was on 50  $\mu$ g of RBCs by  
354 standard Trizol and chloroform extraction following the kit instructions. Isolated RNA was  
355 treated with DNase I and 1  $\mu$ g RNA was used to synthesize first-strand cDNA using SuperScript  
356 IV reverse transcriptase (Thermo Fisher 18090010). Full-length cDNA sequences were obtained  
357 in 35 cycles of PCR reactions with Phusion DNA polymerase (New England Biolabs, Ipswich,  
358 USA; MO531L) and specific primers designed against the sequence of the phylogenetically  
359 characterized white seabass  $\beta$ -NHE obtained from the combined gill and RBC transcriptome  
360 (Integrated DNA Technologies, Coralville, Iowa; F: 5'TCC CGT ACT ATC CTC ATC TTC A-  
361 3' R: 5'-CCT CTG CTC TCT GAA CTG TAA AT-3'). Amplicons were analysed by gel  
362 electrophoresis on a ChemiDoc imaging system (Bio-Rad) that confirmed the presence of a  
363 single band (2372 bp). A-overhangs were added to Phusion products with one unit Taq  
364 polymerase (New England Biolabs; MO267S) followed by 10 min incubation at 72°C. Products  
365 were cloned (TOPO TA Cloning Kit/pCR 2.1-TOPO Vector; Invitrogen; K4500) and the ligated  
366 product was transformed into TOP10 chemically competent *E. coli* cells (Invitrogen; K457501)  
367 according to manufacturer specifications. Following over-night incubation at 37°C, single  
368 colonies of transformants were grown in Luria-Bertani (LB) broth over-night on a shaking  
369 incubator (37°C, 220 rpm; Barnstead MaxQ 4000). Plasmid DNA was isolated (PureLink Quick

370 Plasmid Miniprep kit; Invitrogen K210010) according to manufacturer specifications and inserts  
371 were sequenced to confirm their identity and uploaded to NCBI (MW962257).

### 372 *Calculations and statistical analysis*

373 All data were analysed with R v.4.0.4 (RCoreTeam, 2020) in RStudio v.1.4.1106  
374 (RStudioTeam, 2021) and figures were created with the ggplot2 package (Wickham, 2009).  
375 Normality of the residuals was tested with the Shapiro-Wilk test (stat.desc function in R) and  
376 homogeneity of variances was confirmed with the Levene's test (leveneTest function in R).  
377 Deviations from these parametric assumptions were corrected by transforming the raw data.

378 To determine the blood O<sub>2</sub>-binding characteristics, Hb P<sub>50</sub> and n<sub>H</sub> values were those  
379 determined with the BOBS software v.1.0.20 (Loligo) and oxygen equilibrium curves (OEC)  
380 were generated by fitting a two parameter Hill function to the mean P<sub>50</sub> and n<sub>H</sub> for 8 individual  
381 fish. The main effects of PCO<sub>2</sub> on P<sub>50</sub> and n<sub>H</sub> were analysed with ACOVA ( $P < 0.05$ ,  $N = 8$ ).  
382 Plasma [HCO<sub>3</sub><sup>-</sup>] was calculated from TCO<sub>2</sub> by subtracting the molar [CO<sub>2</sub>] calculated from the  
383 dissociation constant and solubility coefficients in plasma at 17°C and the corresponding sample  
384 pH (Boutilier et al., 1984). The Bohr effects relative to pH<sub>i</sub> and pH<sub>e</sub>, the relationship between  
385 RBC pH<sub>i</sub> and pH<sub>e</sub> and the non-bicarbonate buffer capacity of whole blood were determined by  
386 linear regression analysis, results of which are shown in detail in the supplement (Fig. S1A-D).  
387 The average values for these blood characteristics are shown in the main text and were calculated  
388 as the average slopes across all individuals.

389 In the RBC swelling trial, mean cell Hb was calculated as [Hb] divided by Hct as a  
390 decimal. Since Hb is a membrane impermeable solute, MCHC is used as a common indicator of  
391 RBC swelling. Main effects of drugs (DMSO, ISO and ISO+Am), time (10, 30 and 60 min) and  
392 their interaction (drug×time) on Hct, [Hb], MCHC, pH<sub>e</sub> and pH<sub>i</sub> were determined by two-way  
393 ANOVAs (lm and Anova functions in R;  $N = 5-6$ ;  $P < 0.05$ ) and multiple comparisons were  
394 conducted with t-tests (pairwise.t.test function in R) and controlling the false detection likelihood  
395 (FDR) with a Benjamini-Hochberg correction (p.adjust function in R).

396 The effect of RBC β-adrenergic stimulation on Hb-O<sub>2</sub> binding was assessed by analysing  
397 the absorbance data from the BOBS with a custom R script ([github.com/tillharter/White-](https://github.com/tillharter/White-Seabass-beta-NHE)  
398 [Seabass-beta-NHE](https://github.com/tillharter/White-Seabass-beta-NHE)). In brief, the absorbances recorded at 430 nm were divided by the isosbestic  
399 wavelength of 390 nm (where absorbance is independent of Hb-O<sub>2</sub> binding), and these ratios  
400 were used as the raw data for subsequent analyses. For each trace, the ten final absorbance ratios

401 at each equilibration step were averaged (i.e. 10 s) and Hb-O<sub>2</sub> saturation was calculated relative  
402 to the absorbance at the two initial calibration conditions (i.e. high: 99.7% PO<sub>2</sub>, 0.3% PCO<sub>2</sub>; and  
403 low 0% PO<sub>2</sub>, 0.3% PCO<sub>2</sub>), assuming full saturation or desaturation of Hb, respectively. These  
404 calibration values were measured again at the end of each trial and a linear correction of drift  
405 was performed for each sample. The resulting values for Hb-O<sub>2</sub> saturation were plotted against  
406 PCO<sub>2</sub> and several non-linear models were fit to the data (Michaelis-Menten, Exponential and  
407 Hill). The model with the best fit (lowest AIC) was a three-parameter Hill function that was  
408 applied to each individual trace. The parameter estimates from this model yielded the maximal  
409 reduction in Hb-O<sub>2</sub> saturation (Max.  $\Delta$ Hb-O<sub>2</sub> sat.; %) and the PCO<sub>2</sub> at which this response was  
410 half-maximal (EC<sub>50</sub>PCO<sub>2</sub>; %). The main effects of drugs (DMSO, ISO and ISO+Am), O<sub>2</sub>  
411 (normoxia and hypoxia) and their interaction (drug×O<sub>2</sub>) on the parameter estimates from the Hill  
412 functions were determined by two-way ANOVAs (lm and Anova functions in R;  $N = 6$ ;  $P <$   
413  $0.05$ ). When significant main effects were detected, multiple comparisons were conducted with  $t$ -  
414 tests (pairwise.t.test function in R) and controlling the false detection likelihood (FDR) with a  
415 Benjamini-Hochberg correction (p.adjust function in R). The Root effect was determined as the  
416 Max.  $\Delta$ Hb-O<sub>2</sub> sat. of the control treatment (DMSO). To quantify the relative changes in Hb-O<sub>2</sub>  
417 saturation ( $\Delta$ Hb-O<sub>2</sub> sat.) due to drug treatments, data were expressed relative to the paired  
418 measurements in the DMSO treatment for each individual fish and relative to the initial Hb-O<sub>2</sub>  
419 saturation at 0.3% PCO<sub>2</sub> (i.e. 95.6 and 55.0% Hb-O<sub>2</sub> saturation in normoxia and hypoxia,  
420 respectively). All data are presented as means±s.e.m.

## 421 **Results**

### 422 *Blood O<sub>2</sub>-binding characteristics*

423 The blood O<sub>2</sub>-binding characteristics of white seabass are summarised in Figure 1. When  
424 PCO<sub>2</sub> was increased from arterial tension (0.3%) to severe hypercapnia (2.5%) Hb P<sub>50</sub> increased  
425 significantly from 21.4±0.5 to 88.6±2.6 mmHg. At the same time, the cooperativity of Hb-O<sub>2</sub>  
426 binding, expressed by n<sub>H</sub>, decreased significantly from 1.52±0.04 to 0.84±0.03, which was  
427 reflected in a change in shape of the OECs from sigmoidal to hyperbolic. Over the tested range  
428 of PCO<sub>2</sub>, white seabass displayed a Bohr coefficient of -0.92±0.13 when expressed relative to the  
429 change in pH<sub>e</sub> and -1.13±0.11 when expressed relative to the change in RBC pH<sub>i</sub> (Fig. S1A and  
430 B). In addition to the reduction in Hb-O<sub>2</sub> affinity at elevated PCO<sub>2</sub>, white seabass blood also  
431 displayed a large Root effect with a maximal reduction of Hb-O<sub>2</sub> carrying capacity of  
432 52.4±1.8%. The relationship between pH<sub>i</sub> and pH<sub>e</sub> had a slope of 0.67±0.07 (Fig. S1C),  
433 reflecting the higher buffer capacity of the intracellular space. The non-bicarbonate buffer  
434 capacity of white seabass whole blood was -2.43±0.56 mmol l<sup>-1</sup> pH<sub>e</sub><sup>-1</sup> at a Hct of 5% (Fig. S1D).  
435 By correcting this value for the higher Hct *in vivo*, according to Wood et al. (1982), white  
436 seabass with a Hct of 25% are expected to have a whole blood non-bicarbonate buffer capacity  
437 of -9.68 mmol l<sup>-1</sup> pH<sub>e</sub><sup>-1</sup>.

### 438 *RBC swelling after β-adrenergic stimulation*

439 The β-adrenergic stimulation of white seabass blood with ISO induced changes in the  
440 measured blood parameters (Fig. 2). Significant main effects of drug, time and their interaction  
441 (drug×time), indicate that Hct was affected by the experimental treatments (Fig. 2A). A large  
442 increase in Hct was observed in ISO-treated blood that was absent in ISO+Am and DMSO-  
443 treated RBCs. In addition, a main effect of drug treatment on MCHC indicated that the increase  
444 in Hct after ISO addition was due to swelling of the RBCs, whereas [Hb] was not affected by the  
445 treatments (Fig. 2B). Significant main effects of drug and time were also detected for pH<sub>e</sub>, where  
446 a large extracellular acidification was observed in ISO-treated blood, relative to the DMSO and  
447 ISO+Am treatments (Fig. 2C). No significant main effect of drug or time were observed on RBC  
448 pH<sub>i</sub>, but multiple comparisons indicated a trend for a higher pH<sub>i</sub> in ISO compared to DMSO  
449 treated blood (*P* = 0.081; Fig. 2D). Differential interference contrast (DIC) images confirmed a  
450 normal morphology of the RBCs at the beginning and the end of the trials, thus validating the  
451 fixation procedure. Swelling was observed in ISO-treated RBCs, relative to initial measurements



452 or DMSO and ISO+Am-treated cells (Fig. 2E-H). The swelling of ISO-treated RBCs occurred  
453 largely along the z-axis of the cells (indicated by the arrows), whereas no visible distortion was  
454 observed in the x-y directions.

#### 455 *Molecular $\beta$ -NHE characterisation*

456 The combined gill and RBC *de novo* transcriptome of white seabass contained nine  
457 Slc9a1 transcripts and phylogenetic analysis placed these sequences within well-supported clades  
458 of the NHE family tree (Fig. 3). Importantly, one of these white seabass transcripts grouped with  
459 the Slc9a1b sequences from other teleost fishes, supporting its classification as a white seabass  
460  $\beta$ -NHE. Results from RT-PCR, cloning and sequencing confirmed the expression of  $\beta$ -NHE  
461 mRNA in isolated white seabass RBCs. A search for the Kozak nucleic acid motif in the open  
462 reading frame of the white seabass  $\beta$ -NHE sequence yielded the five most likely potential start  
463 codons, including one that would produce a 66 kDa protein (Table S2). This size closely  
464 matched the single band that was specifically recognized by the polyclonal  $\beta$ -NHE antibody in  
465 Western blots with crude homogenate, cytosolic and membrane-enriched fractions of a white  
466 seabass RBC lysate (Fig. S2A); whereas no immunoreactivity was observed in lanes where the  
467 antibody had been incubated with its pre-immune peptide. The anti- $\alpha$ -tubulin antibody detected a  
468 single band in the RBC crude homogenate, at the predicted size of 54 kDa (Fig. S2B). Finally,  
469 the white seabass  $\beta$ -NHE protein sequence shared seven consecutive amino acids with the  
470 peptide used to raise the polyclonal antibodies (Fig. S2C), which is sufficient for specific  
471 antibody binding (Dunn et al., 1999). More importantly, the antigen peptide sequence was absent  
472 in the other eight white seabass NHE isoforms, ruling out non-specific antibody recognition of  
473 these NHEs.

#### 474 *Subcellular localisation of RBC $\beta$ -NHE*

475 The subcellular location of  $\beta$ -NHE protein in white seabass RBCs was determined by  
476 immunofluorescence cytochemistry and super-resolution confocal microscopy (Fig. 4). In  
477 DMSO-treated RBCs, the  $\beta$ -NHE immunolabelling was most intense in intracellular vesicle-like  
478 structures, and weaker at the plasma membrane. There was substantial heterogeneity in the  
479 staining pattern for  $\beta$ -NHE in these control cells, with varying amounts of intracellular and  
480 membrane staining. In ISO-treated RBCs, the staining pattern for  $\beta$ -NHE was more  
481 homogeneous and most cells showed intense immunoreactivity for  $\beta$ -NHE in the membrane that  
482 co-localised with  $\alpha$ -tubulin in the marginal band, and the intracellular, vesicle-like staining that

483 was observed in the control cells was reduced (see Fig. S3 for an overview image with more  
484 cells). In contrast, ISO-treated cells that were incubated without the primary antibody or where  
485 the antibody was pre-absorbed with its pre-immune-peptide showed no immunoreactivity for  $\beta$ -  
486 NHE (Fig. S4). Finally, optical sectioning and three-dimensional reconstruction of these RBCs  
487 confirmed that the membrane staining for  $\beta$ -NHE occurred in a single plane and co-localised  
488 with  $\alpha$ -tubulin in the marginal band (see 3D Movies S1 and S2).

#### 489 *Hb-O<sub>2</sub> binding after $\beta$ -adrenergic stimulation*

490 To study whether the activation of RBC  $\beta$ -NHEs in white seabass has a protective effect  
491 on Hb-O<sub>2</sub> binding, blood samples were first equilibrated to 21% PO<sub>2</sub> and 0.3% PCO<sub>2</sub> in  
492 tonometers and no significant effects of drug treatment (DMSO, ISO or ISO+Am) were observed  
493 on any of the measured blood parameters and average values were: Hct  $5.20 \pm 0.14\%$  ( $P = 0.095$ ),  
494 [Hb]  $0.178 \pm 0.006$  mM ( $P = 0.889$ ), MCHC  $3.46 \pm 0.15$  mM L<sup>-1</sup> RBC ( $P = 0.490$ ), pH<sub>e</sub>  
495  $7.848 \pm 0.018$  ( $P = 0.576$ ), pH<sub>i</sub>  $7.464 \pm 0.021$  ( $P = 0.241$ ). Thereafter, blood was loaded into the  
496 BOBS, where Hb-O<sub>2</sub> saturation was measured spectrophotometrically at increasing levels of a  
497 respiratory acidosis in normoxia (21% PO<sub>2</sub>). As expected from the pH-sensitivity of Hb-O<sub>2</sub>  
498 binding in white seabass, an increase in PCO<sub>2</sub> from 0.3 to 3% caused a severe reduction in Hb-  
499 O<sub>2</sub> saturation in all treatments via the Root effect (Fig. 5). The raw data were analysed by fitting  
500 a three-parameter Hill model to the individual observations within each treatment and significant  
501 differences were observed in the parameter estimates that describe these models. EC<sub>50</sub>PCO<sub>2</sub> was  
502 affected by the experimental treatments, as shown in a significant main effect of drug (Fig. 6A).  
503 Multiple comparisons confirmed significant differences in EC<sub>50</sub>PCO<sub>2</sub>, which was  $0.85 \pm 0.06\%$  in  
504 DMSO,  $0.91 \pm 0.06\%$  in ISO+Am and  $1.08 \pm 0.06\%$  in ISO-stimulated blood. In contrast, the  
505 magnitude of the responses, Max.  $\Delta$ Hb-O<sub>2</sub> sat., was not affected by the experimental treatments  
506 and no significant main effect of drug was detected; the average Max.  $\Delta$ Hb-O<sub>2</sub> sat. across  
507 treatments was  $-51.1 \pm 0.7\%$  (Fig. 6B).

508 When the same experiment was repeated under hypoxic conditions (3% PO<sub>2</sub>), an increase  
509 in PCO<sub>2</sub> likewise caused a severe reduction in Hb-O<sub>2</sub> saturation, indicating that in white seabass,  
510 a Root effect can also be expressed at saturations around P<sub>50</sub> (Fig. 5). A significant main effect of  
511 O<sub>2</sub> indicated that cells in the hypoxic condition required a lower EC<sub>50</sub>PCO<sub>2</sub> to achieve Max.  
512  $\Delta$ Hb-O<sub>2</sub> sat., compared to the normoxic condition (Fig. 6A). There was also a significant main  
513 effect of drug on EC<sub>50</sub>PCO<sub>2</sub> and multiple comparisons indicated a similar pattern in the

514 individual drug effects as in the normoxic experiment, which was further confirmed by the  
515 absence of a significant drug $\times$ O<sub>2</sub> interaction. Finally, a significant effect of O<sub>2</sub> on Max.  $\Delta$ Hb-O<sub>2</sub>  
516 sat. (Fig. 6B) indicated a larger response magnitude in hypoxic blood, but that was unaffected by  
517 drug treatments, and the average Max.  $\Delta$ Hb-O<sub>2</sub> sat. across treatments was  $-74.1\pm 0.1\%$ .

518 To quantify the benefit of  $\beta$ -adrenergic stimulation during a hypercapnic acidosis, Hb-O<sub>2</sub>  
519 saturation was expressed relative to the paired measurements in the DMSO treatment for each  
520 individual fish and relative to the initial Hb-O<sub>2</sub> saturation at 0.3% PCO<sub>2</sub> (i.e. 95.6 and 55.0% Hb-  
521 O<sub>2</sub> saturation in normoxia and hypoxia, respectively). In normoxia, the benefit of  $\beta$ -NHE  
522 stimulation with ISO showed a bell-shaped relationship with a maximal  $\Delta$ Hb-O<sub>2</sub> sat. of  
523  $7.8\pm 0.02\%$  at 1% PCO<sub>2</sub> (Fig. 7A). When NHEs were inhibited in ISO+Am blood,  $\Delta$ Hb-O<sub>2</sub> sat.  
524 was only  $1.9\pm 0.4\%$  at 1% PCO<sub>2</sub> and significantly lower compared to the other treatments; at  
525 higher PCO<sub>2</sub> the 95% confidence intervals overlapped with the DMSO values, indicating no  
526 difference from controls. In hypoxic blood, the ISO treatment had the largest effects on  $\Delta$ Hb-O<sub>2</sub>  
527 sat. at 0.3% PCO<sub>2</sub>, with maximal values of  $19.2\pm 0.0\%$  that decreased towards higher PCO<sub>2</sub> (Fig.  
528 7B). Whereas, in the ISO+Am treatment,  $\Delta$ Hb-O<sub>2</sub> sat. was  $6.4\pm 0.0\%$  at 0.3% PCO<sub>2</sub>, and  
529 significant differences to the DMSO controls were only observed at PCO<sub>2</sub> below 1.5%.

## 530 Discussion

531 In line with our initial hypothesis, white seabass RBCs had  $\beta$ -NHE activity that protected  
532 the blood O<sub>2</sub>-carrying capacity during hypoxic and hypercapnic conditions. However, not all  
533 predictions were met as expected: white seabass did not have an unusually high Hb-O<sub>2</sub> affinity  
534 and thus, other aspects of their physiology are likely more important in determining their  
535 tolerance to hypoxia. Like other teleosts, white seabass had highly pH-sensitive Hbs, where a  
536 reduction in pH decreased both Hb-O<sub>2</sub> affinity via the Bohr effect and Hb-O<sub>2</sub> carrying capacity  
537 via the Root effect. Several lines of evidence corroborated the presence of a RBC  $\beta$ -NHE in  
538 white seabass and super-resolution imaging revealed, for the first time, the subcellular location  
539 of  $\beta$ -NHE protein in intracellular vesicles and on the RBC membrane. Furthermore, adrenergic  
540 stimulation induced changes in the intracellular distribution of the  $\beta$ -NHE that may indicate a  
541 role of protein translocation in regulating  $\beta$ -NHE activity. The activation of RBC  $\beta$ -NHEs  
542 significantly increased Hb-O<sub>2</sub> saturation during *in-vivo* relevant conditions of hypercapnic  
543 acidification. In fact, the largest benefit of  $\beta$ -NHE activation in normoxia was observed at ~1%  
544 PCO<sub>2</sub>, where Hb-O<sub>2</sub> saturation increased by ~8%. Whereas in hypoxia (3% PO<sub>2</sub>),  $\beta$ -NHE activity  
545 had its largest effect at arterial PCO<sub>2</sub> (0.3%) and enhanced Hb-O<sub>2</sub> saturation by ~20%. However,  
546 the benefits of  $\beta$ -NHE activation in hypoxia decrease rapidly at higher PCO<sub>2</sub>, revealing a  
547 potential vulnerability of white seabass to combinations of these stressors.

548 Many hypoxia tolerant vertebrates have evolved Hbs with a high affinity for O<sub>2</sub> (low Hb  
549 P<sub>50</sub> values), which helps them extract the gas from the respiratory medium (Hughes, 1973;  
550 Mairbäurl, 1994; Tenney, 1995). White seabass in the present study had a Hb P<sub>50</sub> of 21.4±0.5  
551 mmHg (Fig.1), which is higher than the values typically found in hypoxia tolerant fishes, such  
552 carp (*Cyprinus carpio*) that have Hb P<sub>50</sub> values as low as 3.6 mmHg (Brauner et al., 2001). In  
553 fact, the Hb P<sub>50</sub> of white seabass resemble more closely the values in the well-studied rainbow  
554 trout, of 24.8 mmHg (Rummer and Brauner, 2015), a cold-stream salmonid, of no noteworthy  
555 hypoxia tolerance. However, the O<sub>2</sub>-binding affinity of Hb is a trade-off that must strike a  
556 balance between loading O<sub>2</sub> at the gas exchange surface and unloading O<sub>2</sub> at the tissues (Brauner  
557 and Wang, 1997). Everything else being equal, a higher Hb P<sub>50</sub> can sustain a higher PO<sub>2</sub> at the  
558 tissue capillaries, enhancing the diffusion gradient of O<sub>2</sub> to the mitochondria, which is of  
559 particular benefit to those species with a high scope for exercise (Mairbäurl and Weber, 2012).  
560 Thus, it seems that a high Hb-O<sub>2</sub> affinity is not part of the physiological mechanism that

561 facilitates hypoxia tolerance in white seabass, but instead, a high tissue PO<sub>2</sub> may be important to  
562 sustain exercise performance in these active piscivours.

563 As in other teleosts, especially those in the highly-derived group of perciformes, Hb-O<sub>2</sub>  
564 binding in white seabass was highly pH-sensitive. An increase in PCO<sub>2</sub> from arterial levels  
565 (0.3%) to severe hypercapnia (2.5%), caused a significant right-shift of the OEC (Fig. 1) via the  
566 Bohr effect, increasing P<sub>50</sub> to 88.6±2.6 mmHg. When considering the corresponding changes in  
567 pH<sub>e</sub> (from 8.1 to 7.2 over the range of tested PCO<sub>2</sub>; see Fig. S1A) the Bohr coefficient in white  
568 seabass was -0.92, and slightly higher, at -1.13, when considering the changes in RBC pH<sub>i</sub> (from  
569 7.7 to 7.0: Fig. S1B). Again, these Hb-O<sub>2</sub> binding characteristics resemble closely those of  
570 rainbow trout, where P<sub>50</sub> increases to 75 mmHg at 2% PCO<sub>2</sub>, yielding a Bohr coefficient (relative  
571 to pH<sub>e</sub>) of -0.87 (Rummer and Brauner, 2015). A normoxic increase in PCO<sub>2</sub> caused a significant  
572 reduction in Hb-O<sub>2</sub> saturation via the Root effect, and at PCO<sub>2</sub> above 3% the O<sub>2</sub>-carrying  
573 capacity of white seabass Hb was reduced by 52.4±1.8%. These results are in line with those of  
574 other teleosts, such as rainbow trout (~55%), tench (*Tinca tinca*; ~50%) and the European perch  
575 (*Perca fluviatilis*; ~70%), where the larger Root effect values may reflect the higher final PCO<sub>2</sub>  
576 used during those trials (Berenbrink et al., 2011).

577 The Root effect is part of a specialized system of O<sub>2</sub> supply to the eye and the  
578 swimbladder of teleosts, where blood is acidified in a counter-current exchanger (the *rete*  
579 *mirabile*) to produce high PO<sub>2</sub> that bridge the large diffusion distances to the avascular retina of  
580 teleosts and inflate the swimbladder against large hydrostatic pressures (Pelster and Randall,  
581 1998). In the course of teleost evolution there have been numerous secondary losses of the  
582 *choroid* and swimbladder *retes*. While their presence has not directly been determined in white  
583 seabass, an ancestral state reconstruction predicts no secondary loss of either *rete* on the teleost  
584 branch leading up to the perciformes, which include the white seabass (Berenbrink et al., 2005).  
585 In addition, all of the five independent losses of the *choroid rete* have coincided with a reduction  
586 of the Root effect below 40% (Berenbrink, 2007; Berenbrink et al., 2005). Thus, the large Root  
587 effect of white seabass is consistent with the presence of a *choroid rete* and likely critical for  
588 maintaining a high ocular PO<sub>2</sub> that facilitates the visual acuity in these active predators  
589 (Damsgaard et al., 2020).

590 Vertebrate Hbs are intracellular proteins and, as such, are affected by the  
591 microenvironment within the RBC cytoplasm. Teleost β-NHEs can actively modulate Hb-O<sub>2</sub>

592 binding by controlling RBC  $\text{pH}_i$  and several lines of evidence in our study indicate the presence  
593 of functional  $\beta$ -NHEs in white seabass RBCs. A combined gill and RBC transcriptome detected  
594 nine sequences belonging to the vertebrate NHE (Slc9a1) family and phylogenetic analysis  
595 classified the white seabass Slc9a1b transcript as belonging to the larger group of teleost RBC  $\beta$ -  
596 NHEs (Fig. 3). These findings were supported by the results from RT-PCR confirming the  
597 expression of the  $\beta$ -NHE in white seabass RBCs. Western blots with a polyclonal anti-trout  $\beta$ -  
598 NHE antibody recognized a single band at 66 kDa in white seabass RBC homogenates (Fig.  
599 S2A), which is smaller than the 84 kDa predicted based on the longest possible mRNA transcript  
600 (Table S2). However, a search for Kozak motifs revealed the five most likely potential start  
601 codons in the open reading frame of the white seabass  $\beta$ -NHE mRNA sequence, one of which  
602 predicted a protein size of 66 kDa that matches the protein size detected in Western blots. This  
603 predicted  $\beta$ -NHE isoform lacks 158 amino acids on the N-terminus, which, according to  
604 structural models for NHE proteins (Landau et al., 2007), are not essential for the transporter's  
605 activity, but may determine a differential sensitivity to inhibitors (Landau et al., 2007; Lee et al.,  
606 2011). NHE isoforms from other teleosts have been shown to separate in Western blotting with a  
607 similar size discrepancy (Chen et al., 2017), and also show differential sensitivity to amiloride  
608 and its derivatives compared to mammalian NHEs (Blair et al., 2021).

609 Adrenergic stimulation of white seabass RBCs with ISO caused a ~25% volume increase  
610 in the course of 60 min, whereas no changes in RBC volume were detected in DMSO treated  
611 cells. The swelling response was corroborated by a significant reduction in MCHC and by  
612 visually confirming the increase in cell volume under a microscope; these results closely match  
613 previous reports of RBC swelling after adrenergic stimulation in other teleosts (Nikinmaa and  
614 Huestis, 1984; Shu et al., 2017; Weaver et al., 1999). In addition, the ISO-induced swelling was  
615 completely abolished by the inhibition of NHEs in ISO+Am-treated RBCs, providing additional  
616 pharmacological support for the presence of a RBC  $\beta$ -NHE in white seabass. In ISO-treated  
617 RBCs, but not those treated with DMSO or ISO+Am, we observed a decrease in  $\text{pH}_e$ , which is  
618 the direct result of  $\text{H}^+$  excretion by NHE activity. Corresponding changes in RBC  $\text{pH}_i$  are  
619 typically smaller, due to the higher buffer capacity of the intracellular space ( $\text{pH}_i =$   
620  $0.67 \pm 0.07 \times \text{pH}_e$ ; Fig. 1) and the freeze-thaw method is typically associated with a larger error  
621 compared to  $\text{pH}_e$  measurements. Consequently, we were not able to resolve significant treatment  
622 effects on RBC  $\text{pH}_i$ , but a non-significant trend may point towards a small increase in RBC  $\text{pH}_i$ .

623 Another interesting observation in these RBC swelling trials were the changes in cell  
624 morphology due to adrenergic stimulation. The increase in cell volume was largely due to an  
625 expansion along the z-axis of the cells, whereas the dimensions in the x-y axis apparently  
626 remained unaffected. The nucleated RBCs of non-mammalian vertebrates, including fish, have a  
627 marginal band, a structural component of their cytoskeleton formed by strands of  $\alpha$ -tubulin that  
628 maintains their elliptical shape in the face of shear and osmotic disturbances (Joseph-Silverstein  
629 and Cohen, 1984). The stiffness of this marginal band (Dmitrieff et al., 2017) may be a major  
630 impediment to swelling along the x-y axis forcing the cells to widen in the z-direction.

631 Fixed RBCs from these swelling trials were studied in more detail by super-resolution  
632 microscopy and by immunolabelling  $\beta$ -NHE and  $\alpha$ -tubulin (Fig. 4). All RBCs showed  $\beta$ -NHE  
633 immunoreactivity, corroborating the presence of  $\beta$ -NHE protein in these cells. In control RBCs,  
634  $\beta$ -NHE protein was detected intracellularly and appeared to be confined to vesicles, while  
635 weaker staining was detected on the plasma membrane (Fig. 4C, D and S3). A similar staining  
636 pattern has been described for a NHE1-like protein in the RBCs of winter flounder  
637 (*Pseudopleuronectes americanus*; Pedersen et al., 2003). However, the immunolabelling of this  
638 NHE was with polyclonal antibodies raised against a region of the human NHE1 sequence (aa  
639 631-746) that is highly conserved with both the teleost Slc9a1a and Slc9a1b isoforms. Therefore,  
640 these previous results likely include staining of several NHE isoforms including the flounder  $\beta$ -  
641 NHE. The antibody used in the present study showed a high specificity for the white seabass  $\beta$ -  
642 NHE (Fig. S2) and a confounding detection of other RBC NHE isoforms is unlikely.

643 Strikingly, the intracellular localization of  $\beta$ -NHE protein changed after incubating RBCs  
644 with ISO for 60 min. In these stimulated RBCs the staining pattern for  $\beta$ -NHE was more  
645 homogeneous compared to controls, with strong signal at the plasma membrane, and weaker  
646 intracellular signal (Fig. 4G, H and S3). Optical sectioning and 3D reconstructions of these cells  
647 clearly showed that the intense membrane staining for  $\beta$ -NHE was confined to a single plane,  
648 colocalizing with  $\alpha$ -tubulin in the marginal band, and that this staining was mostly absent in  
649 DMSO-treated cells (Movies S1 and S2). Furthermore, the use of super-resolution microscopy  
650 allowed us to discern the subcellular orientation the  $\beta$ -NHE signal, which was extracellular  
651 relative to  $\alpha$ -tubulin (Fig. 4H), thus, indicating a direct contact with the blood plasma that is  
652 essential for regulating  $\text{pH}_i$  via NHE activity. Combined, these observations may point towards  
653 an adrenergically-induced translocation of  $\beta$ -NHE protein from the cytoplasm into the membrane

654 of white seabass RBCs. Intracellular translocation of NHEs in response to various stimuli has  
655 been reported in other systems, such as the gills of acid infused hagfish (Parks et al., 2007),  
656 insulin-treated rat cardiomyocytes (Lawrence et al., 2010), isolated mammalian cells after  
657 acidification (Gens et al., 2007) or the initiation of Na<sup>+</sup>-glucose co-transport in intestinal  
658 epithelial cells (Zhao et al., 2004). Our results may indicate the presence of a similar mechanism  
659 for the teleost RBC  $\beta$ -NHE, where further research is needed to quantify the translocation of  $\beta$ -  
660 NHE protein, resolve its time-course, and characterise the underlying cellular mechanisms. If  
661 substantiated, these findings may open new avenues in the research of RBC pH<sub>i</sub> regulation in  
662 teleosts and perhaps other vertebrates.

663 The activation of RBC  $\beta$ -NHEs has been shown to raise pH<sub>i</sub> above the equilibrium  
664 condition and plays an important role in protecting Hb-O<sub>2</sub> binding in teleosts (Nikinmaa, 1992).  
665 Previous work has characterised the resulting left-shift in the OEC (Jensen et al., 1983;  
666 Nikinmaa, 1983; Nikinmaa and Soivio, 1979) and the changes in arterial O<sub>2</sub>-carrying capacity  
667 due to adrenergic stimulation of the RBCs (Cossins and Richardson, 1985; Ferguson et al., 1989;  
668 Nikinmaa et al., 1984). In the present study we quantified the protective effect of  $\beta$ -NHE  
669 activation on Hb-O<sub>2</sub> saturation in white seabass under environmentally relevant levels of  
670 hypercapnia and hypoxia. As expected, Hb-O<sub>2</sub> saturation decreased significantly, due to the Root  
671 effect, when PCO<sub>2</sub> was increased from 0.3-3% (Fig. 5). Adrenergic stimulation of the RBCs with  
672 ISO significantly delayed the reduction in Hb-O<sub>2</sub> saturation to higher EC<sub>50</sub>PCO<sub>2</sub> that were  
673 1.08±0.06% in ISO compared to 0.85±0.06% in DMSO-treated blood (Fig. 6A). In ISO+Am-  
674 treated RBC, the EC<sub>50</sub>PCO<sub>2</sub> decreased significantly to 0.91±0.06%, compared to ISO-treated  
675 cells, corroborating the involvement of the RBC  $\beta$ -NHE in the response. However, the  
676 EC<sub>50</sub>PCO<sub>2</sub> of ISO+Am-treated RBCs was still significantly higher compared to DMSO controls,  
677 perhaps indicating that 1 mM amiloride did not lead to a full inhibition of the  $\beta$ -NHE under the  
678 tested conditions, or that other, amiloride insensitive transporters, play a role in elevating RBC  
679 pH<sub>i</sub> after adrenergic stimulation.

680 While  $\beta$ -NHE activity shifted the reduction in Hb-O<sub>2</sub> saturation to a higher PCO<sub>2</sub>, the  
681 magnitude of the Root effect was not affected by adrenergic stimulation (Fig. 6B). No significant  
682 differences were observed in Max.  $\Delta$ Hb-O<sub>2</sub> sat. in any of the tested treatments and therefore, a  
683 severe acidosis generated by high PCO<sub>2</sub> can overwhelm the physiological capacity of the  $\beta$ -NHE  
684 to maintain an elevated RBC pH<sub>i</sub>. The H<sup>+</sup> extrusion by the  $\beta$ -NHE is secondarily active and



685 driven by the trans-membrane  $\text{Na}^+$  gradient created by the RBC  $\text{Na}^+-\text{K}^+$ -ATPase (NKA). While  
686 both NKA activity (Bourne and Cossins, 1982) and the RBC rate of  $\text{O}_2$  consumption ( $\text{M}\square\text{O}_2$ )  
687 increase after adrenergic stimulation (Boutilier and Ferguson, 1989), it is possible that the  
688 capacity of the NKA to maintain the larger  $\text{Na}^+$  gradients required to compensate for a greater  
689 reduction in  $\text{pH}_i$  is limited, as could be the availability of ATP to fuel the exchange. In addition,  
690  $\text{H}^+$  that are extruded by the  $\beta$ -NHE will react with  $\text{HCO}_3^-$  in the plasma to form  $\text{CO}_2$  that can,  
691 once again, diffuse into the cells. This re-acidification of the cells via  $\text{CO}_2$  is part of the Jacobs-  
692 Stewart cycle and typically rate-limited by the formation of  $\text{CO}_2$  in the plasma of teleosts (Jacobs  
693 and Stewart, 1942). However, as  $\text{pH}_e$  decreases, the pool of plasma  $\text{H}_2\text{CO}_3$  becomes larger  
694 (Motais et al., 1989), accelerating the Jacobs-Stewart cycle and the re-acidification of the cells,  
695 which may explain, in part, why  $\beta$ -NHE activity is ineffective at very high  $\text{PCO}_2$ .

696 The benefit of  $\beta$ -NHE activity on Hb- $\text{O}_2$  saturation was non-linear over the range of  
697  $\text{PCO}_2$  tested, and in normoxia the bell-shaped response had a maximum at  $\sim 1\%$   $\text{PCO}_2$  (Fig. 7A).  
698 The observed relationship is likely dependent on the sigmoidal shape of the OEC, where a left-  
699 shift due to  $\beta$ -NHE activity has only marginal effects when Hb- $\text{O}_2$  saturation is high and the  
700 curve is flat (Kobayashi et al., 1994). In addition,  $\beta$ -NHE activity in many teleosts is stimulated  
701 by high intracellular  $[\text{H}^+]$  and inhibited by higher extracellular  $[\text{H}^+]$  as  $\text{pH}_e$  decreases, yielding a  
702 bell-shaped relationship between  $\beta$ -NHE activity and pH (Borgese et al., 1987). The ecological  
703 implications are noteworthy, as the protective effect of  $\beta$ -NHE activity on Hb- $\text{O}_2$  binding is  
704 greatest over the range of  $\text{PCO}_2$  that white seabass are currently experiencing during severe red-  
705 tide or upwelling events. The increase in Hb- $\text{O}_2$  saturation at these  $\text{PCO}_2$  is  $\sim 8\%$ , and the effect  
706 can be harnessed continuously with every pass of the RBCs through the gills. Everything else  
707 being equal, an increase in arterial  $\text{O}_2$  content can sustain a proportionally higher  $\text{M}\square\text{O}_2$ ,  
708 increasing the scope for activity or reducing the requirements for anaerobic pathways of ATP  
709 production that can lead to a toxic accumulation of metabolic by-products, such as lactate and  
710  $\text{H}^+$ . Thus, for fish that experience a potentially life-threatening surge in  $\text{PCO}_2$ , an 8% increase in  
711 arterial  $\text{O}_2$  content could make the difference between escaping into less-noxious waters or  
712 perishing in the attempt.

713 In the hypoxic trials, DMSO treated blood at arterial  $\text{PCO}_2$  (0.3%) had a Hb- $\text{O}_2$  saturation  
714 of  $55.0\pm 3.3\%$ , which was close to the target value around Hb  $\text{P}_{50}$  (Fig. 5). As in normoxia, an  
715 increase in  $\text{PCO}_2$  caused a significant reduction in Hb- $\text{O}_2$  saturation, indicating the presence of a

716 Root effect in hypoxia, which further decreased Hb-O<sub>2</sub> saturation, even below the level of the  
717 maximal normoxic Root effect. Consequently, H<sup>+</sup> binding to Hb must occur over nearly the  
718 entire range of the OEC, which stands in contrast to previous findings in rainbow trout where the  
719 Bohr effect and H<sup>+</sup> binding to Hb occurred largely in the upper half of the OEC (Brauner et al.,  
720 1996; Brauner et al., 2000b). The possibility of inter-specific differences in the interaction  
721 between Hb-O<sub>2</sub> and H<sup>+</sup> binding cannot be resolved from the present data. However, it seems  
722 more likely that the kinetics of H<sup>+</sup> binding that induce the Bohr effect are different from those of  
723 the Root effect, which is supported by previous work indicating different molecular mechanisms  
724 for the two effects (Brittain, 1987; Perutz and Brunori, 1982). The interacting kinetics of O<sub>2</sub> and  
725 H<sup>+</sup> binding to the Root effect Hbs of teleosts remain a worthwhile avenue for future research and  
726 studying a broader range of environmental and metabolic scenarios, in more species, may  
727 strengthen the important ecological implications of the present work.

728 As in normoxic blood, adrenergic activation of the  $\beta$ -NHE in hypoxia, increased Hb-O<sub>2</sub>  
729 saturation during a hypercapnic acidosis. This protective effect of the  $\beta$ -NHE was reflected in a  
730 significantly higher EC<sub>50</sub>PCO<sub>2</sub> in ISO- compared to DMSO or ISO+Am-treated RBCs (Fig. 6A).  
731 A significant main effect of O<sub>2</sub> on EC<sub>50</sub>PCO<sub>2</sub>, would indicate that in hypoxic blood a lower  
732 PCO<sub>2</sub> is required to desaturate Hb, compared to normoxic blood. However, this parameter  
733 estimate is influenced by the combined effects of PO<sub>2</sub> and PCO<sub>2</sub> on Hb-O<sub>2</sub> saturation (by taking  
734 into account the full scale from 0-100%), which is not easily untangled statistically. Importantly,  
735 there was no drug×O<sub>2</sub> interaction, indicating that the effect of the drugs was similar under  
736 normoxia and hypoxia, highlighting the benefit of  $\beta$ -NHE activation under both conditions.

737 In hypoxia, the benefit of  $\beta$ -NHE activation on Hb-O<sub>2</sub> saturation was also non-linear over  
738 the tested range of PCO<sub>2</sub> (Fig. 7B).  $\beta$ -NHE activation in hypoxic blood caused the largest  
739 increase in Hb-O<sub>2</sub> saturation at arterial PCO<sub>2</sub> (0.3%) and the benefits decreased markedly  
740 towards higher levels of hypercapnia; likely due to the flattening of the OEC at low Hb-O<sub>2</sub>  
741 saturations and perhaps some inhibition of the transporter by the increasing extracellular [H<sup>+</sup>]. In  
742 hypoxic blood,  $\beta$ -NHE activity had a larger effect on Hb-O<sub>2</sub> binding compared to normoxic  
743 blood, and at 0.3% PCO<sub>2</sub>, increased Hb-O<sub>2</sub> saturation by 11±0.4%. This effect is even greater  
744 when considering that the available O<sub>2</sub>-carrying capacity is lower in hypoxia and when expressed  
745 relative to the available Hb-O<sub>2</sub> saturation (55% in DMSO treated blood), the relative benefit of  $\beta$ -  
746 NHE activity was 19.2±0.0%. Many teleost  $\beta$ -NHEs are O<sub>2</sub>-sensitive (Gibson et al., 2000) and

747 the larger effects of  $\beta$ -NHE activity on Hb-O<sub>2</sub> saturation in hypoxia may be related to a partial  
748 inhibition of the transporter in normoxia; whereas, the effect appears to be less severe in white  
749 seabass compared to other species (Motais et al., 1987; Salama and Nikinmaa, 1988; Weaver et  
750 al., 1999). The nearly 20% increase in Hb-O<sub>2</sub> saturation due to  $\beta$ -NHE activity is of great  
751 ecological significance and could be a principal pathway to safeguard arterial O<sub>2</sub> transport and  
752 facilitate the hypoxia tolerance of white seabass in the wild. However, the present data also  
753 indicate a diminishing benefit of the  $\beta$ -NHE response when PCO<sub>2</sub> increases; thus, revealing a  
754 potential vulnerability of white seabass to the combined stressors of hypoxia and hypercapnia;  
755 surviving these conditions likely requires additional behavioural and metabolic adjustments, that  
756 are yet to be determined.

757 **Conclusion**

758         The present results provide a thorough characterisation of the Hb-O<sub>2</sub> binding system of  
759 white seabass, a non-model marine teleost with great ecological and economic importance in  
760 Southern California. Several lines of evidence confirmed the presence of a RBC β-NHE and  
761 super-resolution microscopy may point towards the regulation of the transporter's activity via  
762 intracellular translocation, a potentially novel pathway that deserves a more thorough  
763 investigation. In white seabass, the activity of the RBC β-NHE provides significant protection of  
764 Hb-O<sub>2</sub> binding during hypercapnic conditions with maximal benefits around the ecologically  
765 relevant level of ~1% PCO<sub>2</sub>. Large benefits of β-NHE activation were also observed in hypoxia,  
766 however, with a greater sensitivity to increases in PCO<sub>2</sub>. Combined, these data indicate that RBC  
767 function plays a critical role in modulating the O<sub>2</sub>-binding characteristics of the pH-sensitive Hbs  
768 in white seabass and is likely part of the suite of physiological responses that determines their  
769 hypoxia and hypercapnia tolerance. Finally, these results also highlight a potential vulnerability  
770 of white seabass to combinations of these stressors and further research is needed to study the  
771 implications for wild fish conservation along the steadily warming and eutrophicated Californian  
772 coast and in high density aquaculture.

773 **Acknowledgements**

774           Thanks are due to Mark Drawbridge at the Hubbs SeaWorld Research Institute (HSWRI)  
775 for generously providing the white seabass and Phil Zerofski, Jessica Hallisey, Garfield Kwan  
776 and Daniel Jio for their help with animal care.

777 **Competing interests**

778           The authors declare no competing interests.

779 **Funding**

780           The present study was funded by a National Science Foundation (NSF) grant to MT  
781 (award no. 1754994) and AMC was supported by a SIO Postdoctoral Scholar fellowship.

782 **Data Availability**

783 All data are made available through github ([github.com/tillharter/White-Seabass-beta-](https://github.com/tillharter/White-Seabass-beta-NHE)  
784 NHE) for R source codes and raw data files and NCBI for sequence data (see detailed accession  
785 numbers in manuscript and supplement).



786 **References**

- 787 **Berenbrink, M.** (2007). Historical reconstructions of evolving physiological complexity: O<sub>2</sub>  
788 secretion in the eye and swimbladder of fishes. *J. Exp. Biol.* **210**, 1641–1652.
- 789 **Berenbrink, M., Koldkjaer, P., Kepp, O. and Cossins, A. R.** (2005). Evolution of oxygen  
790 secretion in fishes and the emergence of a complex physiological system. *Science* **307**,  
791 1752–1757.
- 792 **Berenbrink, M., Koldkjaer, P., Wright, E. H., Kepp, O. and da Silva, A. J.** (2011).  
793 Magnitude of the Root effect in red blood cells and haemoglobin solutions of fishes: a  
794 tribute to August Krogh. *Acta Physiol.* **202**, 583–592.
- 795 **Blair, S., Li, X., Dutta, D., Chamot, D., Fliegel, L. and Goss, G.** (2021). Rainbow Trout  
796 (*Oncorhynchus mykiss*) Na<sup>+</sup>/H<sup>+</sup> Exchangers tNhe3a and tNhe3b Display Unique  
797 Inhibitory Profiles Dissimilar from Mammalian NHE Isoforms. *Int. J. Mol. Sci.* **22**, 2205.
- 798 **Bohr, C., Hasselbalch, K. and Krogh, A.** (1904). About a new biological relation of high  
799 importance that the blood carbonic acid tension exercises on its oxygen binding. *Skand.*  
800 *Arch. Physiol.* **16**, 402–412.
- 801 **Borgese, F., Garcia-Romeu, F. and Motais, R.** (1987). Ion movements and volume changes  
802 induced by catecholamines in erythrocytes of rainbow trout: effect of pH. *J. Physiol.* **382**,  
803 145–157.
- 804 **Borgese, F., Sardet, C., Cappadoro, M., Pouyssegur, J. and Motais R** (1992). Cloning and  
805 expression of a cAMP-activated Na<sup>+</sup>/H<sup>+</sup> exchanger: evidence that the cytoplasmic  
806 domain mediates hormonal regulation. *PNAS* **89**, 6765–9.
- 807 **Bourne, P. K. and Cossins, A. R.** (1982). On the instability of K<sup>+</sup> influx in erythrocytes of the  
808 rainbow trout, *Salmo gairdneri*, and the role of catecholamine hormones in maintaining  
809 *in vivo* influx activity. *J. Exp. Biol.* **101**, 93–104.
- 810 **Boutilier, R. G. and Ferguson, R. A.** (1989). Nucleated red cell function: metabolism and pH  
811 regulation. *Can. J. Zool.* **67**, 2986–2993.
- 812 **Boutilier, R. G., Heming, T. A. and Iwama, G. K.** (1984). Physicochemical parameters for use  
813 in fish respiratory physiology. In *Fish Physiology* (ed. Hoar W. S. and Randall, D. J.), pp.  
814 403–426. New York: Academic Press.
- 815 **Brauner, C. J. and Wang, T.** (1997). The optimal oxygen equilibrium curve: a comparison  
816 between environmental hypoxia and anemia. *Am. Zool.* **37**, 101–108.
- 817 **Brauner, C. J., Gilmour, K. M. and Perry, S. F.** (1996). Effect of haemoglobin oxygenation  
818 on Bohr proton release and CO<sub>2</sub> excretion in the rainbow trout. *Resp. Physiol.* **106**, 65–  
819 70.

- 820 **Brauner, C. J., Thorarensen, H., Gallagher, P., Farrell, A. P. and Randall, D. J.** (2000a).  
821 CO<sub>2</sub> transport and excretion in rainbow trout (*Oncorhynchus mykiss*) during graded  
822 sustained exercise. *Resp. Physiol.* **119**, 69–82.
- 823 **Brauner, C. J., Thorarensen, H., Gallagher, P., Farrell, A. P. and Randall, D. J.** (2000b).  
824 The interaction between O<sub>2</sub> and CO<sub>2</sub> exchange in rainbow trout during graded sustained  
825 exercise. *Resp. Physiol.* **119**, 83–96.
- 826 **Brauner, C. J., Wang, T., Val, A. L. and Jensen, F. B.** (2001). Non-linear release of Bohr  
827 protons with haemoglobin-oxygenation in the blood of two teleost fishes; carp (*Cyprinus*  
828 *carpio*) and tambaqui (*Colossoma macropomum*). *Fish Physiol. Biochem.* **24**, 97–104.
- 829 **Brittain, T.** (1987). The Root effect. *Comp. Biochem. Physiol.* **86B**, 473–481.
- 830 **Bushnell, B.** (2014). *BBMap: A Fast, Accurate, Splice-Aware Aligner*. Lawrence Berkeley  
831 National Lab. (LBNL), Berkeley, CA (United States).
- 832 **Caldwell, S., Rummer, J. L. and Brauner, C. J.** (2006). Blood sampling techniques and  
833 storage duration: Effects on the presence and magnitude of the red blood cell beta-  
834 adrenergic response in rainbow trout (*Oncorhynchus mykiss*). *Comp. Biochem. Physiol.,*  
835 *A: Mol. Integr. Physiol.* **144**, 188–195.
- 836 **Castresana, J.** (2000). Selection of Conserved Blocks from Multiple Alignments for Their Use  
837 in Phylogenetic Analysis. *Mol. Biol. Evol.* **17**, 540–552.
- 838 **Chen, X. L., Zhang, B., Chng, Y. R., Ong, J. L. Y., Chew, S. F., Wong, W. P., Lam, S. H.**  
839 **and Ip, Y. K.** (2017). Na<sup>+</sup>/H<sup>+</sup> Exchanger 3 Is Expressed in Two Distinct Types of  
840 Ionocyte, and Probably Augments Ammonia Excretion in One of Them, in the Gills of  
841 the Climbing Perch Exposed to Seawater. *Front. Physiol.* **8**.
- 842 **Chen, S., Zhou, Y., Chen, Y. and Gu, J.** (2018). fastp: an ultra-fast all-in-one FASTQ  
843 preprocessor. *Bioinformatics* **34**, i884–i890.
- 844 **Clifford, A. M., Weinrauch, A. M., Edwards, S. L., Wilkie, M. P. and Goss, G. G.** (2017).  
845 Flexible ammonia handling strategies using both cutaneous and branchial epithelia in the  
846 highly ammonia-tolerant Pacific hagfish. *Am. J. Physiol. Regul., Integr. Comp. Physiol.*  
847 **313**, R78–R90.
- 848 **Cossins, A. R. and Richardson, P. A.** (1985). Adrenaline-induced Na<sup>+</sup>/H<sup>+</sup> exchange in trout  
849 erythrocytes and its effects upon oxygen carrying capacity. *J. Exp. Biol.* **118**, 229–246.
- 850 **Damsgaard, C., Lauridsen, H., Harter, T. S., Kwan, G. T., Thomsen, J. S., Funder, A. M.,**  
851 **Supuran, C. T., Tresguerres, M., Matthews, P. G. and Brauner, C. J.** (2020). A novel  
852 acidification mechanism for greatly enhanced oxygen supply to the fish retina. *eLife* **9**,  
853 e58995.
- 854 **Diaz, R. J. and Rosenberg, R.** (2008). Spreading Dead Zones and Consequences for Marine  
855 Ecosystems. *Science* **321**, 926–929.

- 856 **Dmitrieff, S., Alsina, A., Mathur, A. and Nédélec, F. J.** (2017). Balance of microtubule  
857 stiffness and cortical tension determines the size of blood cells with marginal band across  
858 species. *PNAS* 201618041.
- 859 **Dunn, C., O'Dowd, A. and Randall, R. E.** (1999). Fine mapping of the binding sites of  
860 monoclonal antibodies raised against the Pk tag. *J Immunol Methods* **224**, 141–150.
- 861 **Edgar, R. C.** (2004). MUSCLE: multiple sequence alignment with high accuracy and high  
862 throughput. *Nucleic Acids Res.* **32**, 1792–1797.
- 863 **Ferguson, R. A., Tufts, B. L. and Boutilier, R. G.** (1989). Energy metabolism in trout red cells:  
864 consequences of adrenergic stimulation *in vivo* and *in vitro*. *J. Exp. Biol.* **143**, 133–147.
- 865 **Frieder, C. A., Nam, S. H., Martz, T. R. and Levin, L. A.** (2012). High temporal and spatial  
866 variability of dissolved oxygen and pH in a nearshore California kelp forest.  
867 *Biogeosciences* **9**, 3917–3930.
- 868 **Galtier, N., Gouy, M. and Gautier, C.** (1996). SEAVIEW and PHYLO\_WIN: two graphic  
869 tools for sequence alignment and molecular phylogeny. *Bioinformatics* **12**, 543–548.
- 870 **Gens, J. S., Du, H., Tackett, L., Kong, S.-S., Chu, S. and Montrose, M. H.** (2007). Different  
871 ionic conditions prompt NHE2 and NHE3 translocation to the plasma membrane.  
872 *Biochim. Biophys. Acta, Biomembr.* **1768**, 1023–1035.
- 873 **Gibson, J., Cossins, A. and Ellory, J.** (2000). Oxygen-sensitive membrane transporters in  
874 vertebrate red cells. *J. Exp. Biol.* **203**, 1395–1407.
- 875 **Gouy, M., Guindon, S. and Gascuel, O.** (2010). SeaView Version 4: A Multiplatform  
876 Graphical User Interface for Sequence Alignment and Phylogenetic Tree Building. *Mol.*  
877 *Biol. Evol.* **27**, 221–224.
- 878 **Grabherr, M. G., Haas, B. J., Yassour, M., Levin, J. Z., Thompson, D. A., Amit, I.,**  
879 **Adiconis, X., Fan, L., Raychowdhury, R., Zeng, Q., et al.** (2011). Full-length  
880 transcriptome assembly from RNA-Seq data without a reference genome. *Nat.*  
881 *Biotechnol.* **29**, 644–652.
- 882 **Harley, C. D. G., Hughes, A. R., Hultgren, K. M., Miner, B. G., Sorte, C. J. B., Thornber,**  
883 **C. S., Rodriguez, L. F., Tomanek, L. and Williams, S. L.** (2006). The impacts of  
884 climate change in coastal marine systems. *Ecol. Lett.* **9**, 228–241.
- 885 **Hughes, G. M.** (1973). Respiratory responses to hypoxia in fish. *Am. Zool.* **13**, 475–489.
- 886 **Jacobs, M. H. and Stewart, D. R.** (1942). The role of carbonic anhydrase in certain ionic  
887 exchanges involving the erythrocyte. *J. gen. Physiol.* **25**, 539–552.
- 888 **Jensen, F. B. and Weber, R. E.** (1982). Respiratory properties of tench blood and hemoglobin.  
889 Adaptation to hypoxic-hypercapnic water. *Mol. Physiol.* **2**, 235–250.

- 890 **Jensen, B. J., Nikinmaa, M. and Weber, R. E.** (1983). Effects of exercise stress on acid-base  
891 balance and respiratory function in blood of the teleost *Tinca tinca*. *Resp. Physiol.* **51**,  
892 291–301.
- 893 **Joseph-Silverstein, J. and Cohen, W. D.** (1984). The cytoskeletal system of nucleated  
894 erythrocytes. III. Marginal band function in mature cells. *J. Cell Biol.* **98**, 2118–2125.
- 895 **Kobayashi, M., Ishigaki, K., Kobayashi, M. and Imai, K.** (1994). Shape of the haemoglobin-  
896 oxygen equilibrium curve and oxygen transport efficiency. *Resp. Physiol.* **95**, 321–328.
- 897 **Kozak, M.** (1987). An analysis of 5'-noncoding sequences from 699 vertebrate messenger  
898 RNAs. *Nucleic Acids Res.* **15**, 8125–8148.
- 899 **Landau, M., Herz, K., Padan, E. and Ben-Tal, N.** (2007). Model structure of the Na<sup>+</sup>/H<sup>+</sup>  
900 exchanger 1 (NHE1): functional and clinical implications. *J Biol Chem* **282**, 37854–  
901 37863.
- 902 **Lawrence, S. P., Holman, G. D. and Koumanov, F.** (2010). Translocation of the Na<sup>+</sup>/H<sup>+</sup>  
903 exchanger 1 (NHE1) in cardiomyocyte responses to insulin and energy-status signalling.  
904 *Biochem J* **432**, 515–523.
- 905 **Le, S. Q. and Gascuel, O.** (2008). An Improved General Amino Acid Replacement Matrix. *Mol.*  
906 *Biol. Evol.* **25**, 1307–1320.
- 907 **Lee, B. L. L. L., Sykes, B. D. S. D. and Fliegel, L. F.** (2011). Structural analysis of the Na<sup>+</sup>/H<sup>+</sup>  
908 exchanger isoform 1 (NHE1) using the divide and conquer approach. *Biochem. Cell Biol.*
- 909 **Lewis, E. and Wallace, D. W. R.** (1998). *Program Developed for CO2 System Calculations.*  
910 Oak Ridge Natl. Lab., Oak Ridge, Tenn.: ORNL/CDIAC-105, Carbon Dioxide Inf. Anal.  
911 Cent.
- 912 **Mahe, Y., Garciaromeu, F. and Motais, R.** (1985). Inhibition by amiloride of both adenylate-  
913 cyclase activity and the Na<sup>+</sup>/H<sup>+</sup> antiporter in fish erythrocytes. *Eur. J. Pharmacol.* **116**,  
914 199–206.
- 915 **Mairbäurl, H.** (1994). Red blood cell function in hypoxia at altitude and exercise. *Int. J. Sports*  
916 *Med.* **15**, 51–63.
- 917 **Mairbäurl, H. and Weber, R. E.** (2012). Oxygen transport by hemoglobin. *Compr. Physiol.* **2**,  
918 1463–1489.
- 919 **Mandic, M., Todgham, A. E. and Richards, J. G.** (2009). Mechanisms and evolution of  
920 hypoxia tolerance in fish. *Proc. R. Soc. Lond., Ser. B: Biol. Sci.* **276**, 735–744.
- 921 **Miller, M. A., Pfeiffer, W. and Schwartz, T.** (2010). Creating the CIPRES Science Gateway  
922 for Inference of Large Phylogenetic Trees. pp. 1–8. New Orleans, LA.

- 923 **Montgomery, D. W., Simpson, S. D., Engelhard, G. H., Birchenough, S. N. R. and Wilson,**  
924 **R. W.** (2019). Rising CO<sub>2</sub> enhances hypoxia tolerance in a marine fish. *Sci. Rep.* **9**,  
925 15152.
- 926 **Motais, R., Garcia-Romeu, F. and Borgese, F.** (1987). The control of Na<sup>+</sup>/H<sup>+</sup> exchange by  
927 molecular oxygen in trout erythrocytes. A possible role of hemoglobin as a transducer. *J.*  
928 *gen. Physiol.* **90**, 197–207.
- 929 **Motais, R., Fievet, B., Garcia-Romeu, F. and Thomas, S.** (1989). Na<sup>+</sup>-H<sup>+</sup> exchange and pH  
930 regulation in red blood cells: role of uncatalyzed H<sub>2</sub>CO<sub>3</sub><sup>-</sup> dehydration. *Am. J. Physiol.*  
931 **256**, C728–C735.
- 932 **Nikinmaa, M.** (1983). Adrenergic regulation of hemoglobin oxygen-affinity in rainbow trout red  
933 cells. *J. Comp. Physiol.* **152**, 67–72.
- 934 **Nikinmaa, M.** (1992). Membrane transport and control of hemoglobin-oxygen affinity in  
935 nucleated erythrocytes. *Physiol. Rev.* **72**, 301–21.
- 936 **Nikinmaa, M. and Huestis, W. H.** (1984). Adrenergic swelling of nucleated erythrocytes -  
937 cellular mechanisms in a bird, domestic goose, and 2 teleosts, striped bass and rainbow  
938 trout. *J. Exp. Biol.* **113**, 215–224.
- 939 **Nikinmaa, M. and Soivio, A.** (1979). Oxygen dissociation curves and oxygen capacities of  
940 blood of a freshwater fish, *Salmo gairdneri*. *Ann. Zool. Fenn.* **16**, 217–221.
- 941 **Nikinmaa, M., Cech, J. J. and McEnroe, M.** (1984). Blood oxygen transport in stressed striped  
942 bass (*Morone saxatilis*): role of β-adrenergic responses. *J. Comp. Physiol.* **154**, 365–369.
- 943 **Nishikawa, T., Ota, T. and Isogai, T.** (2000). Prediction whether a human cDNA sequence  
944 contains initiation codon by combining statistical information and similarity with protein  
945 sequences. *Bioinformatics* **16**, 960–967.
- 946 **Parks, S. K., Tresguerres, M. and Goss, G. G.** (2007). Blood and gill responses to HCl  
947 infusions in the Pacific hagfish (*Eptatretus stoutii*). *Can. J. Zool.* **85**, 855–862.
- 948 **Pedersen, S. F., King, S. A., Rigor, R. R., Zhuang, Z., Warren, J. M. and Cala, P. M.** (2003).  
949 Molecular cloning of NHE1 from winter flounder RBCs: activation by osmotic  
950 shrinkage, cAMP, and calyculin A. *Am. J. Physiol. Cell Physiol.* **284**, C1561–C1576.
- 951 **Pelster, B.** (1997). Buoyancy at depth. In *Fish Physiology* (ed. Randall, D.) and Farrell, A.), pp.  
952 195–238. New York: Academic Press.
- 953 **Pelster, B. and Randall, D. J.** (1998). Physiology of the Root effect. In *Fish Physiology* (ed.  
954 Perry, S. F.) and Tufts, B. L.), pp. 113–140. New York: Academic Press.
- 955 **Perutz, M. F. and Brunori, M.** (1982). Stereochemistry of cooperative effects in fish and  
956 amphibian haemoglobins. *Nature* **299**, 421–426.

- 957 **Randall, D. J. and Perry, S. F.** (1992). Catecholamines. In *Fish Physiology* (ed. Hoar, W. S.),  
958 Randall, D. J.), and Farrell, A. P.), pp. 255–300. New York: Academic Press.
- 959 **RCoreTeam** (2020). *R: A language and environment for statistical computing*. Vienna, Austria:  
960 R Foundation for Statistical Computing.
- 961 **Root, R. W.** (1931). The respiratory function of the blood of marine fishes. *Biol. Bull.* **61**, 427–  
962 456.
- 963 **RStudioTeam** (2021). *RStudio: Integrated Development Environment for R*. Boston, MA:  
964 RStudio, Inc.
- 965 **Rummer, J. L. and Brauner, C. J.** (2015). Root effect haemoglobins in fish may greatly  
966 enhance general oxygen delivery relative to other vertebrates. *PLoS one* **10**, e0139477.
- 967 **Rummer, J. L., Roshan-Moniri, M., Balfry, S. K. and Brauner, C. J.** (2010). Use it or lose it?  
968 Sablefish, *Anoplopoma fimbria*, a species representing a fifth teleostean group where the  
969  $\beta$ NHE associated with the red blood cell adrenergic stress response has been secondarily  
970 lost. *J. Exp. Biol.* **213**, 1503–1512.
- 971 **Salama, A. and Nikinmaa, M.** (1988). The adrenergic responses of carp (*Cyprinus carpio*) red  
972 cells: effects of PO<sub>2</sub> and pH. *J. Exp. Biol.* **136**, 405–416.
- 973 **Salama, A. and Nikinmaa, M.** (1989). Species differences in the adrenergic responses of fish  
974 red cells: studies on whitefish, pikeperch, trout and carp. *Fish Physiol. Biochem.* **6**, 167–  
975 173.
- 976 **Scholander, P. F. and Van Dam, L.** (1954). Secretion of gases against high pressures in the  
977 swimbladder of deep sea fishes. I. Oxygen dissociation in blood. *Biol. Bull.* **107**, 247–  
978 259.
- 979 **Shu, J. J., Harter, T. S., Morrison, P. R. and Brauner, C. J.** (2017). Enhanced hemoglobin-  
980 oxygen unloading in migratory salmonids. *J. Comp. Physiol. B* **7**, 1–11.
- 981 **Stamatakis, A.** (2014). RAxML version 8: a tool for phylogenetic analysis and post-analysis of  
982 large phylogenies. *Bioinformatics* **30**, 1312–1313.
- 983 **Talavera, G. and Castresana, J.** (2007). Improvement of Phylogenies after Removing  
984 Divergent and Ambiguously Aligned Blocks from Protein Sequence Alignments.  
985 *Systematic Biology* **56**, 564–577.
- 986 **Tenney, S. M.** (1995). Hypoxia and the Brain: Functional significance of differences in  
987 mammalian hemoglobin affinity for oxygen. In *Proceeding of the 9th International*  
988 *Hypoxia Symposium* (ed. Sutton, J. R., Houston C. S., and Coates, G.), pp. 57–68. Lake  
989 Louise, Canada: Queen city printers, Burlington, Vt.

- 990 **Tetens, V. and Lykkeboe, G.** (1988). Potency of adrenaline and noradrenaline for b-adrenergic  
991 proton extrusion from red cells of rainbow trout, *Salmo gairdneri*. *J. Exp. Biol.* **134**, 267–  
992 280.
- 993 **Van Dolah, F M** (2000). Marine algal toxins: origins, health effects, and their increased  
994 occurrence. *Environ. Health Perspect.* **108**, 133–141.
- 995 **van Kampen, E. J. and Zijlstra, W. G.** (1983). Spectrophotometry of Hemoglobin and  
996 Hemoglobin Derivatives. In *Advances in Clinical Chemistry* (ed. Latner, A. L.) and  
997 Schwartz, M. K.), pp. 199–257. Elsevier.
- 998 **Vaquer-Sunyer, R. and Duarte, C. M.** (2008). Thresholds of hypoxia for marine biodiversity.  
999 *PNAS* **105**, 15452–15457.
- 1000 **Weaver, Y. R., Kiessling, K. and Cossins, A. R.** (1999). Responses of the Na<sup>+</sup>/H<sup>+</sup> exchanger of  
1001 European flounder red blood cells to hypertonic, beta-adrenergic and acidotic stimuli. *J.*  
1002 *Exp. Biol.* **202**, 21–32.
- 1003 **Wickham, H.** (2009). *ggplot2: Elegant Graphics for Data Analysis*. New York: Springer-  
1004 Verlag.
- 1005 **Wittenberg, J. B. and Wittenberg, B. A.** (1962). Active secretion of oxygen into the eye of  
1006 fish. *Nature* **194**, 106–107.
- 1007 **Wood, C. M., McDonald, D. G. and McMahon, B. R.** (1982). The influence of experimental  
1008 anemia on blood acid-base regulation *in vivo* and *in vitro* in the starry flounder  
1009 (*Platichthys stellatus*) and the rainbow trout (*Salmo gairdneri*). *J. Exp. Biol.* **96**, 221–237.
- 1010 **Zeidler, R. and Kim, H. D.** (1977). Preferential hemolysis of postnatal calf red cells induced by  
1011 internal alkalization. *J. Gen. Physiol.* **70**, 385–401.
- 1012 **Zhao, H., Shiue, H., Palkon, S., Wang, Y., Cullinan, P., Burkhardt, J. K., Musch, M. W.,**  
1013 **Chang, E. B. and Turner, J. R.** (2004). Ezrin regulates NHE3 translocation and  
1014 activation after Na<sup>+</sup>-glucose cotransport. *PNAS* **101**, 9485–9490.
- 1015

1016 **Figure legends**

1017 **Figure 1 Oxygen binding characteristics of white seabass whole blood.** Oxygen equilibrium  
1018 curves showing haemoglobin-oxygen saturation (Hb-O<sub>2</sub> sat.; %) as a function of the partial  
1019 pressure of oxygen (PO<sub>2</sub>; mmHg, where 7.5 mmHg equals 1%) at five partial pressures of carbon  
1020 dioxide (PCO<sub>2</sub>). The PO<sub>2</sub> that yields 50% Hb-O<sub>2</sub> saturation (P<sub>50</sub>) and the cooperativity coefficient  
1021 of Hb-O<sub>2</sub> binding (Hill coefficient, n<sub>H</sub>) are shown for each curve. The main effects of PCO<sub>2</sub> on  
1022 P<sub>50</sub> and n<sub>H</sub> were analysed with ACOVA ( $P < 0.05$ ,  $N = 8$ ). The Bohr coefficients (B) relative to  
1023 extracellular (pH<sub>e</sub>) and intracellular (pH<sub>i</sub>), the relationship between pH<sub>e</sub> and pH<sub>i</sub> and the non-  
1024 bicarbonate buffer capacity of the blood (at 5% Hct) were determined by linear regressions (see  
1025 Fig. S1). The Root effect (R) was determined at 21% PO<sub>2</sub> from the model parameters shown for  
1026 the DMSO treatment in Fig. 6B. All data are means±s.e.m.

1027  
1028 **Figure 2 Changes in blood parameters after adrenergic stimulation of white seabass whole**  
1029 **blood.** A) Haematocrit (%), B) mean cell haemoglobin content (MCHC; mM haemoglobin l<sup>-1</sup> red  
1030 blood cells), C) extracellular pH (pH<sub>e</sub>) and D) intracellular pH (pH<sub>i</sub>). Blood was equilibrated in  
1031 tonometers at 3% PO<sub>2</sub> and 1% PCO<sub>2</sub> and treated with either: i) a carrier control (DMSO; 0.25%),  
1032 ii) the β-adrenergic agonist isoproterenol (ISO; 10 μM) or iii) ISO plus amiloride (ISO+Am; 1  
1033 mM), an inhibitor of sodium-proton exchangers (NHE). The dotted line indicates initial values  
1034 for each parameter and changes were recorded over 60 min. The main effects of drug, time, and  
1035 their interaction term (drug×time) were analysed with a two-way ANOVA ( $P < 0.05$ ,  $N = 6$  and  
1036  $N = 5$  for ISO+Am). There were no significant changes in haemoglobin concentration ([Hb];  
1037 mM) throughout the trials. Multiple comparisons were with paired t-tests with a Benjamini-  
1038 Hochberg correction and superscript letters that differ indicate significant differences between  
1039 treatments at 60 min. Individual datapoints and means±s.e.m. Inserts E-H) differential  
1040 interference contrast (DIC, 60x) images of red blood cells fixed at the beginning (ini) and the end  
1041 of the trial (T60). Cell swelling was visually confirmed in ISO-treated cells, but not in other  
1042 treatments, and mostly along the z-axis of the cells (arrows), while the x-y-axis seemed largely  
1043 unaffected.

1044  
1045 **Figure 3: Phylogenetic analysis of nine NHE-like protein sequences in the *de novo* assembly**  
1046 **of a combined white seabass gill and red blood cell transcriptome.** Novel white seabass  
1047 sequences are highlighted in blue and the β-NHE in red (Slc9a1b). Shadings delineate sub-  
1048 families of the Slc9a1 gene family. The tree was rooted against the NHE2 from *Caenorhabditis*  
1049 *elegans* in orange. Accession numbers for all species are those reported in Table S1.  
1050

1051 **Figure 4 Immunocytochemical localisation of the β-adrenergic sodium proton exchanger**  
1052 **(β-NHE) in white seabass red blood cells.** Blood was equilibrated in tonometers at 3% PO<sub>2</sub> and  
1053 1% PCO<sub>2</sub> for 60 mins (see Fig. 2 for details) in the presence of either: A-D) a carrier control  
1054 (DMSO; 0.25%), or E-H) the β-adrenergic agonist isoproterenol (ISO; 10 μM). Fixed cells were  
1055 immuno-stained with a monoclonal α-tubulin antibody to visualize the marginal band (red), with  
1056 DAPI to visualize the cell nuclei (A and E), and with a polyclonal anti-β-NHE antibody (green,



1057 B and F). D and H) Magnified view of the insets in the merged images, where arrows indicate  
1058 weak or absent  $\beta$ -NHE immunoreactivity on the membrane of Ctrl cells and intense staining in  
1059 ISO-treated cells (for a larger sample size of these representative patterns see Fig. S3).

1060

1061 **Figure 5 Haemoglobin-oxygen saturation (Hb-O<sub>2</sub> sat.; %) during hypercapnic acidification**  
1062 **of white seabass whole blood.** Haematocrit was set to 5%, blood was equilibrated in tonometers  
1063 at 21% PO<sub>2</sub> and 0.3% PCO<sub>2</sub> and treated with either: i) a carrier control (DMSO; 0.25%), ii) the  
1064  $\beta$ -adrenergic agonist isoproterenol (ISO; 10  $\mu$ M), or iii) ISO plus amiloride (ISO+Am; 1 mM),  
1065 an inhibitor of sodium-proton exchangers (NHE). For each sample, runs were performed in  
1066 normoxia (21% PO<sub>2</sub>; solid symbols) or hypoxia (3% PO<sub>2</sub>; open symbols). Individual datapoints  
1067 and means $\pm$ s.e.m. ( $N = 6$ ).

1068

1069 **Figure 6 Parameter estimates describing the changes in haemoglobin-oxygen saturation**  
1070 **during hypercapnic acidification of white seabass whole blood.** A) The PCO<sub>2</sub> that elicits a  
1071 half-maximal reduction in Hb-O<sub>2</sub> saturation (EC<sub>50</sub>PCO<sub>2</sub>; %). and B) the maximal reduction in  
1072 Hb-O<sub>2</sub> saturation due to acidification (Max.  $\Delta$ Hb-O<sub>2</sub> sat.; %). Treatments were: i) a carrier  
1073 control (DMSO; 0.25%), ii) the  $\beta$ -adrenergic agonist isoproterenol (ISO; 10  $\mu$ M), or iii) ISO plus  
1074 amiloride (ISO+Am; 1 mM) an inhibitor of sodium-proton exchangers (NHE). For each sample,  
1075 runs were performed in normoxia (21% PO<sub>2</sub>; solid symbols) or hypoxia (3% PO<sub>2</sub>; open  
1076 symbols). The main effects of drug treatments (drug), oxygen (O<sub>2</sub>) and their interaction term  
1077 (drug $\times$ O<sub>2</sub>) were analysed with a two-way ANOVA ( $P < 0.05$ ,  $N = 6$ ). Multiple comparisons were  
1078 with paired t-tests and a Benjamini-Hochberg correction and superscript letters that differ  
1079 indicate significant differences between treatments for each O<sub>2</sub> tension. Individual datapoints and  
1080 means $\pm$ s.e.m. ( $N = 6$ ).

1081

1082 **Figure 7 Relative changes in haemoglobin-oxygen saturation ( $\Delta$ Hb-O<sub>2</sub> sat.; %) during**  
1083 **hypercapnic acidification of white seabass whole blood.** A) in normoxia (21% PO<sub>2</sub>; solid  
1084 symbols) or B) in hypoxia (3% PO<sub>2</sub>; open symbols). Treatments were: i) a carrier control  
1085 (DMSO; 0.25%), ii) the  $\beta$ -adrenergic agonist isoproterenol (ISO; 10  $\mu$ M), or iii) ISO plus  
1086 amiloride (ISO+Am; 1 mM), an inhibitor of sodium-proton exchangers (NHE). Individual  
1087 datapoints, means $\pm$ s.e.m. and 95% confidence intervals ( $N = 6$ ).

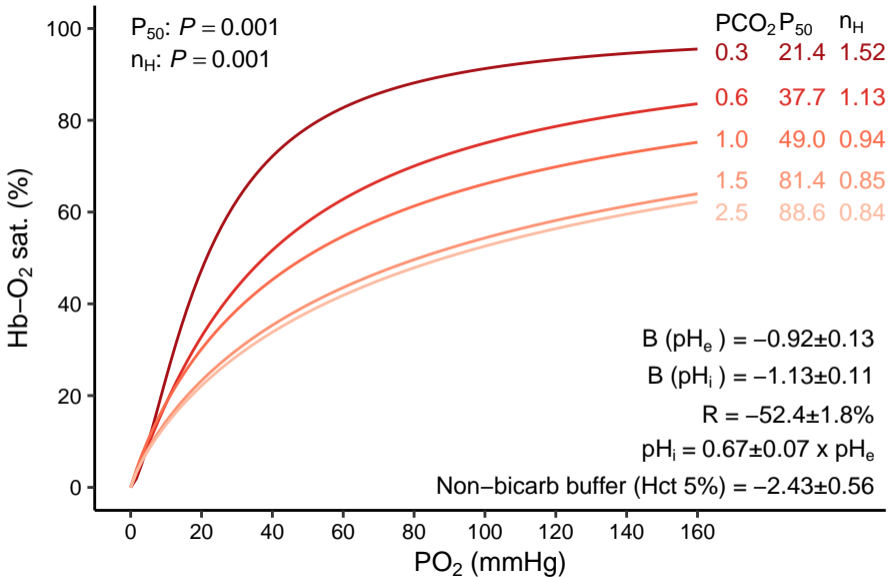

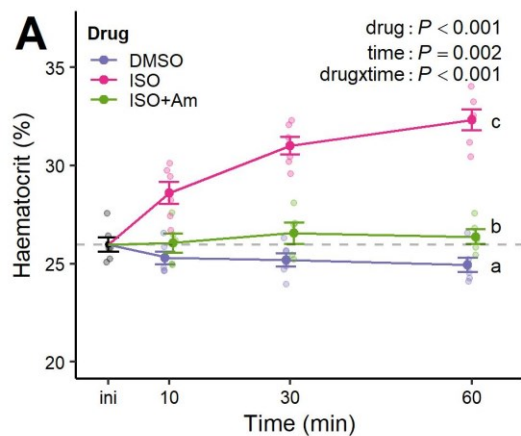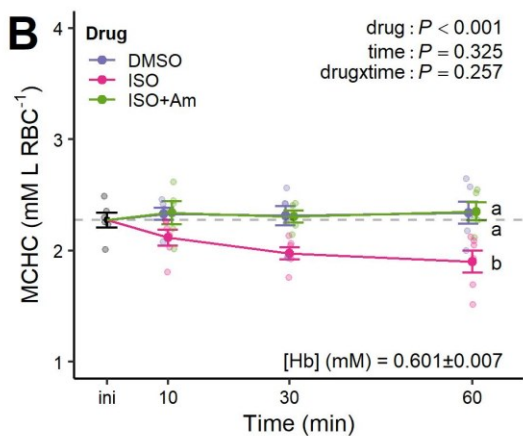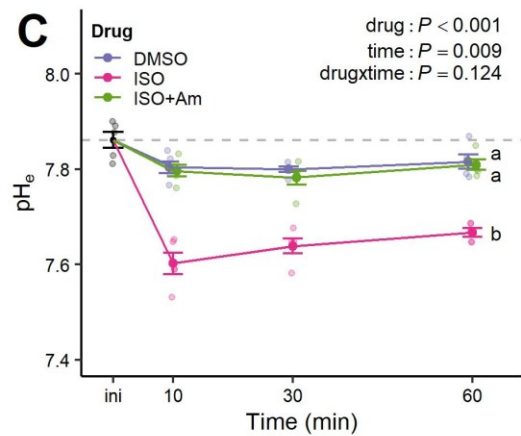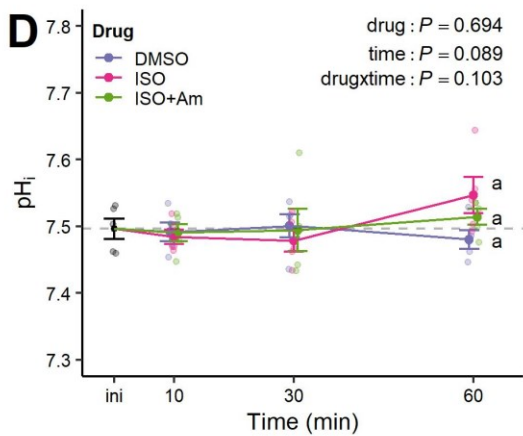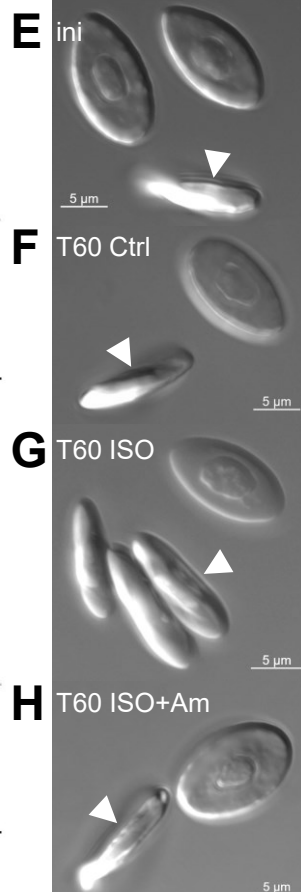

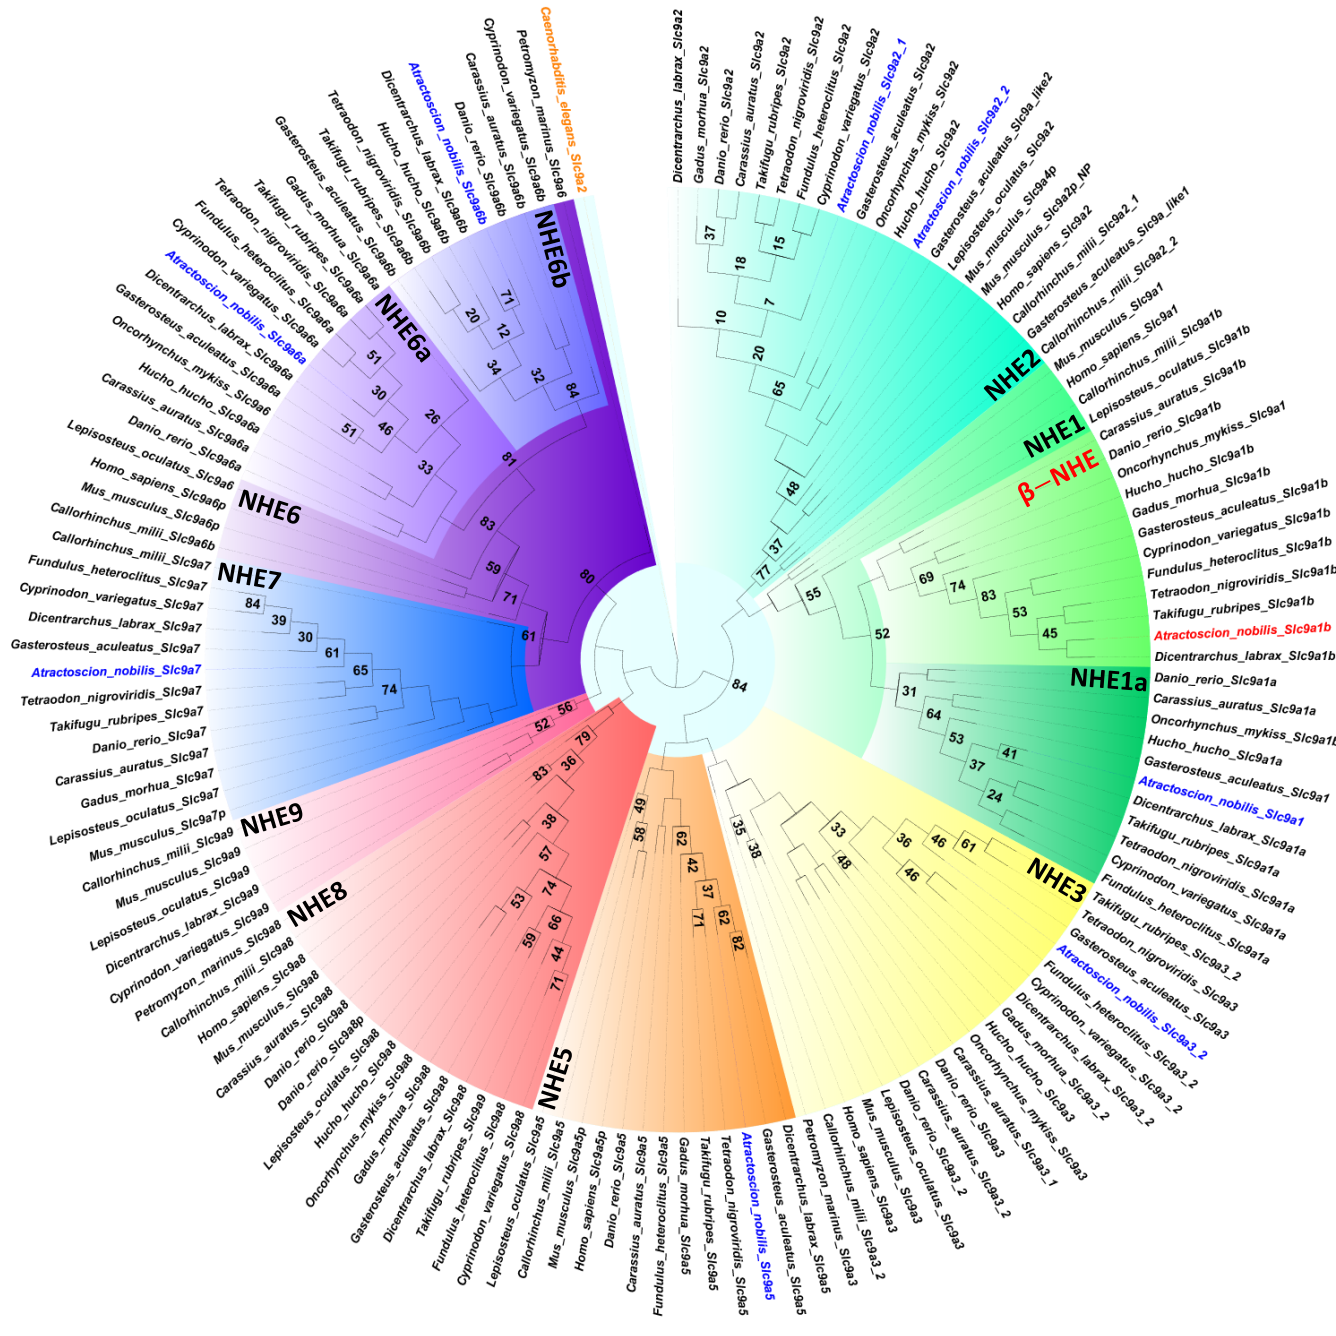

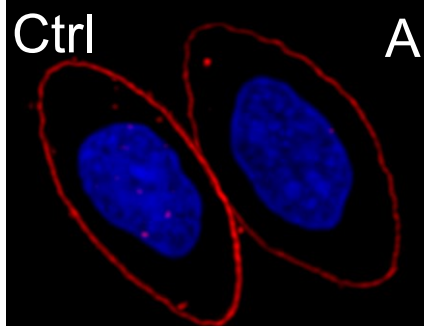

2 μm

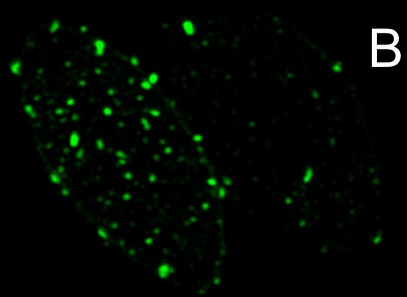

2 μm

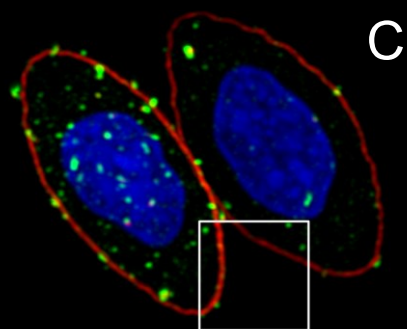

2 μm

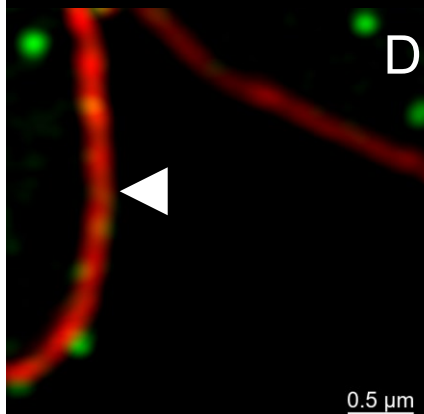

0.5 μm

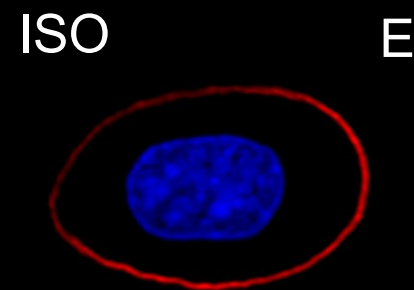

**Nucleus**  
**α-tubulin**

2 μm

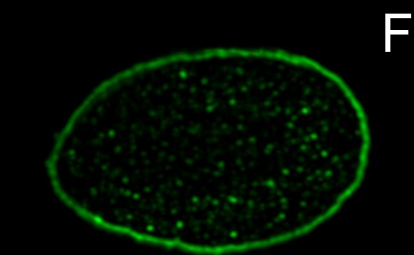

**β-NHE**

2 μm

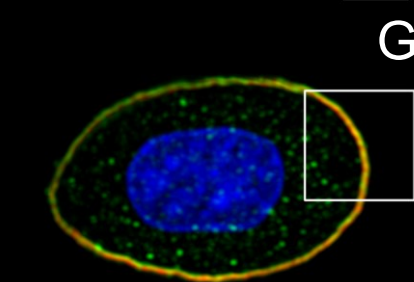

**Merged**

2 μm

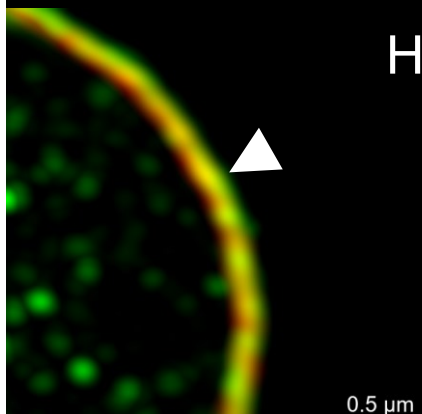

0.5 μm

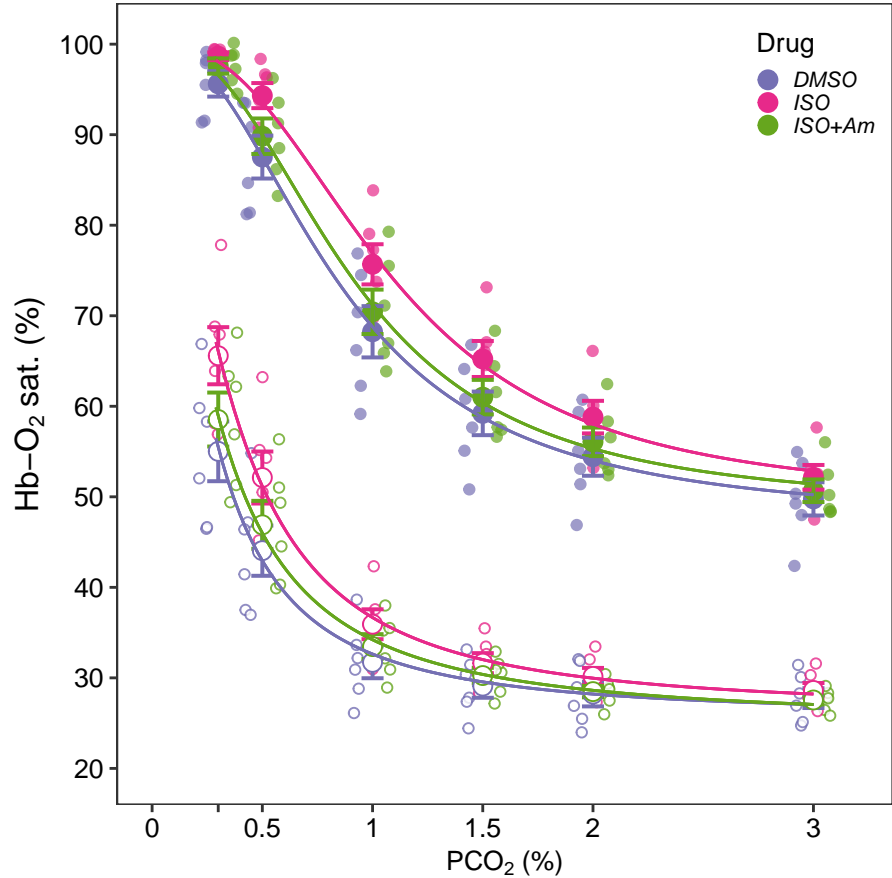

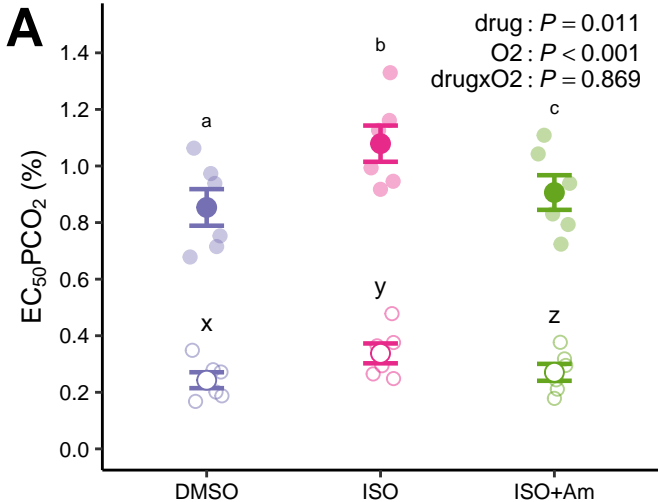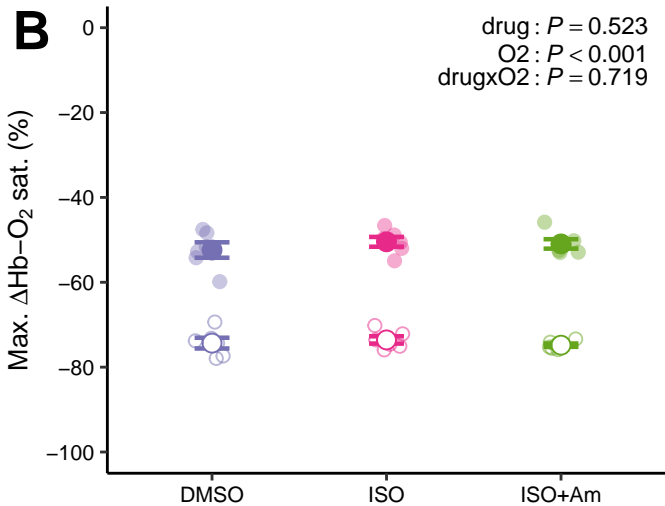

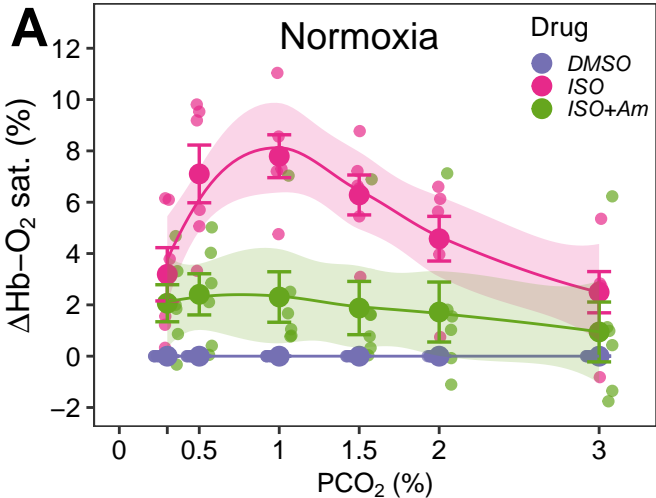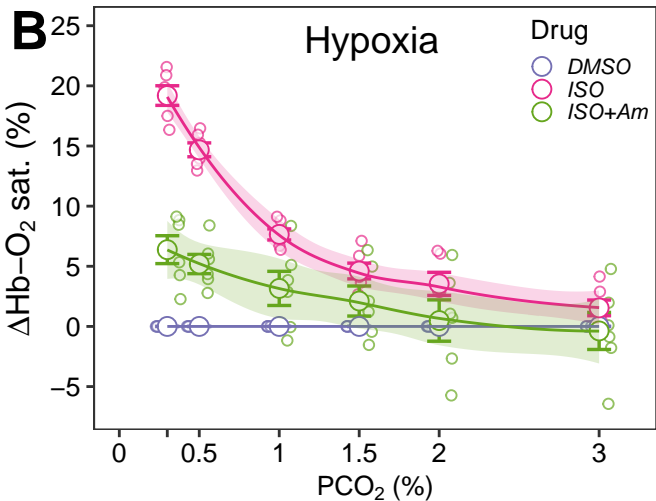

Source: https://www.biorxiv.org/content/10.1101/2021.04.28.441819v1.full.pdf
