1 **Title:**

2 Quantifying the potential for red blood cell  $\beta$ -adrenergic sodium-proton exchangers to  
3 protect oxygen transport in hypoxic and hypercapnic white seabass

4  
5 **Running title:**

6  $\beta$ -adrenergic protection of red blood cell oxygen transport

7 **Authors:**

8 Till S. Harter<sup>1</sup>, Alexander M. Clifford and Martin Tresguerres<sup>2</sup>

9 **Affiliations:**

10 Marine Biology Research Division, Scripps Institution of Oceanography, University of  
11 California San Diego, La Jolla, CA 92093, USA

12 <sup>1</sup>corresponding author: [tharter@ucsd.edu](mailto:tharter@ucsd.edu)

13 <sup>2</sup>co-corresponding author: [mtresguerres@ucsd.edu](mailto:mtresguerres@ucsd.edu)

14 **Keywords:**

15  $\beta$ -NHE, Slc9a1b, carbon dioxide, hemoglobin, red tide, Bohr effect, Root effect, fish

16  
17 **ORCID IDs:**

18 TSH 0000-0003-1712-1370

19 MT 0000-0002-7090-9266

20

21 **Abstract:**

22 White seabass (*Atractoscion nobilis*) are increasingly experiencing periods of low oxygen  
23 ( $O_2$ ; hypoxia) and high carbon dioxide ( $CO_2$ , hypercapnia) due to climate change and  
24 eutrophication of the coastal waters of California. Hemoglobin (Hb) is the principal  $O_2$  carrier in  
25 the blood and in many teleost fishes Hb- $O_2$  binding is compromised at low pH; however, the red  
26 blood cells (RBC) of some species regulate intracellular pH with adrenergically-stimulated  
27 sodium-proton-exchangers ( $\beta$ -NHE). We hypothesized that RBC  $\beta$ -NHEs in white seabass are an  
28 important mechanism that can protect the blood  $O_2$ -carrying capacity during hypoxia and  
29 hypercapnia. We determined the  $O_2$ -binding characteristics of white seabass blood, the response  
30 of RBCs to adrenergic stimulation, and quantified the protective effect of  $\beta$ -NHE activity on Hb-  
31  $O_2$  saturation. White seabass had typical teleost Hb characteristics, with a moderate  $O_2$  affinity  
32 ( $PO_2$  at half-saturation;  $P_{50}$  2.9 kPa) that was highly pH-sensitive (Bohr coefficient -0.92; Root  
33 effect 52%). The presence of RBC  $\beta$ -NHEs was confirmed by functional, molecular and  
34 bioinformatic data and super-resolution imaging revealed, for the first time, the subcellular  
35 location of  $\beta$ -NHE protein in vesicle-like structures and on the RBC membrane, and its  
36 translocation after adrenergic stimulation. The activation of RBC  $\beta$ -NHEs increased Hb- $O_2$   
37 saturation by ~8% in normoxia at 1 kPa  $PCO_2$ , and by up to 20% in hypoxia. Our results confirm  
38 that RBC  $\beta$ -NHE activity in white seabass has great potential to protect arterial  $O_2$  transport in  
39 environmentally relevant conditions of hypoxia and hypercapnia, but also reveal a potential  
40 vulnerability of fish to combinations of these stressors.

## 41 Introduction

42 White seabass (*Atractoscion nobilis*), a teleost fish species endemic to the coastal waters  
43 of California, are apex-predators with ecological significance, sought-after targets of recreational  
44 and commercial fisheries and are gaining importance in aquaculture. Their natural habitat along  
45 the kelp forests of the north-eastern Pacific is subject to strong seasonal fluctuations in water  
46 chemistry, due to the upwelling of deeper waters that are often depleted of oxygen (O<sub>2</sub>; hypoxia),  
47 have a high carbon dioxide tension (CO<sub>2</sub>; hypercapnia) and thus, a low pH (1). In addition, a  
48 steadily warming climate and growing anthropogenic nutrient loading are increasing the  
49 frequency of large algae blooms (“red tides”) in California’s coastal waters (2). When these  
50 algae blooms wane, the microbial decomposition of their biomass, consumes O<sub>2</sub> and produces  
51 CO<sub>2</sub> and other toxic and acidic by-products of biological decay, such as hydrogen sulfide,  
52 altogether creating large hypoxic and hypercapnic zones (3). Species that are highly mobile may  
53 be able to avoid these areas, but for many sedentary species, survival will depend on enduring  
54 these conditions. Climate change at large is also leading to more hypoxic and acidic oceans and,  
55 over generations, some species may adapt to cope with their altered habitats (4). However, the  
56 reoccurrence of upwelling and severe algae blooms may acutely expose animals to conditions  
57 that far exceed worst-case predictions for the end of the century, creating strong selective  
58 pressures for hypoxia and hypercapnia tolerance and perhaps overwhelming the rates at which  
59 some species can adapt to climate change.

60 The most recent severe red tide in Southern California occurred in April-May of 2020,  
61 when the water measurements at the pier of the Scripps Institution of Oceanography (SIO) in La  
62 Jolla (CA, USA) revealed average daily dissolved O<sub>2</sub> levels of <2 mg l<sup>-1</sup> and pH as low as 7.06  
63 (5). At a water temperature of 17°C and 35 ppt salinity, these values correspond to 5.3 kPa PO<sub>2</sub>  
64 (6) and 1.16 kPa PCO<sub>2</sub> (CO2SYS software; , 7). Equally alarming was the prolonged duration of  
65 hypoxia, where for nine consecutive days water PO<sub>2</sub> was below the threshold (4.6 mg l<sup>-1</sup>) that is  
66 considered lethal for 90% of marine life (8). The SIO aquatics facility is supplied with water  
67 taken in at the pier, which resulted in hypoxic and hypercapnic exposures of all research animals,  
68 despite every effort to aerate the tanks. However unfortunate, this natural experiment revealed a  
69 remarkable tolerance of white seabass to these adverse water conditions, despite being deprived  
70 the behavioral avoidance of hypoxia that may be recruited in the wild. Therefore, the aim of the  
71 present study was to explore the O<sub>2</sub>-transport capacity of white seabass with a focus on the

72 cellular mechanisms at the level of the red blood cell (RBC) that may contribute to their hypoxia  
73 and hypercapnia tolerance.

74 For obligate aerobic animals, the challenge to surviving unavoidable environmental  
75 hypoxia is balancing the uptake and delivery of O<sub>2</sub> with its consumption in the mitochondria (9).  
76 Hemoglobin (Hb) is the principal O<sub>2</sub> carrier in the blood and therefore the cardiovascular O<sub>2</sub>-  
77 carrying capacity is largely determined by the O<sub>2</sub>-binding characteristics of Hb. As such, a higher  
78 Hb-O<sub>2</sub> affinity will favor the extraction of O<sub>2</sub> from hypoxic waters and thus, a lower Hb P<sub>50</sub> (the  
79 partial pressure of O<sub>2</sub> at which Hb is 50% saturated) is typically associated with hypoxia  
80 tolerance in fishes (10, 11); however, whether white seabass have high-affinity Hbs that would  
81 confer some hypoxia tolerance is currently unknown.

82 Hb-O<sub>2</sub> binding in teleost fishes is highly pH-sensitive, where a reduction in pH decreases  
83 Hb-O<sub>2</sub> affinity via the Bohr effect (12), and the Root effect prevents Hb from becoming fully O<sub>2</sub>-  
84 saturated at low pH, even at super-atmospheric PO<sub>2</sub> (13, 14). The reduction in Hb-O<sub>2</sub> carrying  
85 capacity due to the Root effect is physiologically significant, as it enhances the unloading of O<sub>2</sub>  
86 at the eyes and the swimbladder of teleosts, where blood is acidified locally (15–17). In contrast,  
87 during a systemic blood acidosis that may occur during exercise or hypoxia, the pH-sensitive  
88 Hbs of teleosts may fail to become fully oxygenated at the gills, decreasing the O<sub>2</sub>-carrying  
89 capacity of arterial blood and leading to hypoxemia at the tissues. Thus, a combined hypoxic and  
90 hypercapnic exposure may be especially dangerous for teleosts, as a reduced availability of O<sub>2</sub> in  
91 the environment is paired with the simultaneous reduction of Hb-O<sub>2</sub> affinity via the Bohr effect  
92 at low pH; however, whether white seabass have pH-sensitive Hbs is currently unknown.

93 Hb is housed within RBCs that, in teleosts, may prevent systemic hypoxemia by actively  
94 regulating their intracellular pH (pH<sub>i</sub>) to protect Hb-O<sub>2</sub> binding during a reduction in  
95 extracellular pH (pH<sub>e</sub>). In brief, a decrease in arterial PO<sub>2</sub> or pH leads to the release of  
96 catecholamines into the blood (18, 19), which bind to a β-adrenergic receptor on the RBC  
97 membrane and activate a sodium-proton-exchanger (β-NHE, Slc9a1b,) via the cyclic adenosine  
98 monophosphate (cAMP) pathway (20). The extrusion of H<sup>+</sup> by the β-NHE raises pH<sub>i</sub> above the  
99 equilibrium condition, which increases Hb-O<sub>2</sub> affinity and will promote the extraction of O<sub>2</sub> from  
100 hypoxic waters (21). The adrenergic stimulation of RBCs also causes an influx of Na<sup>+</sup> and Cl<sup>-</sup>  
101 that leads to osmotic swelling and that has been used as a marker to determine the presence of  
102 RBC β-NHEs in fish species (22, 23). A broader phylogenetic analysis indicates that most

103 teleosts, but not other fishes, have RBC  $\beta$ -NHEs (24); however, whether white seabass RBCs  
104 have  $\beta$ -NHE activity is currently unknown.

105         Based on these considerations, we hypothesized that  $\beta$ -NHE activity in white seabass is  
106 an important mechanism that can protect the blood O<sub>2</sub>-carrying capacity during environmentally  
107 relevant levels of hypoxia and hypercapnia (PO<sub>2</sub><5.3 kPa and PCO<sub>2</sub> <1.16 kPa; see above). We  
108 tested this hypothesis in a series of *in vitro* experiments and predicted that: i) white seabass have  
109 a high Hb-O<sub>2</sub> affinity to maintain O<sub>2</sub> uptake under hypoxic conditions, which was addressed by  
110 generating oxygen equilibrium curves (OEC) over a range of PO<sub>2</sub>; ii) white seabass display the  
111 large Bohr and Root effects that are typical of teleosts, which was addressed by generating OECs  
112 over a range of PCO<sub>2</sub>, and measuring pHe and RBC pH<sub>i</sub>; iii) white seabass have a RBC  $\beta$ -NHE,  
113 which was addressed using molecular, bioinformatic and immunocytochemical techniques to  
114 establish its presence and localization, and by measuring RBC swelling after adrenergic  
115 stimulation and the inhibition of NHEs with amiloride; and finally iv) we quantified the  
116 protective effect of RBC  $\beta$ -NHE activity on blood O<sub>2</sub>-carrying capacity under environmentally  
117 relevant conditions, by measuring Hb-O<sub>2</sub> saturation at increasing levels a hypercapnia in  
118 normoxia and hypoxia.

## 119 **Materials and Methods**

### 120 *Animals and husbandry*

121 White seabass (*A. nobilis*, Ayres 1860) were obtained from the Hubbs Sea World  
122 Research Institute (HSWRI, Carlsbad, USA) and were held indoors at the SIO aquatics facility  
123 for several months before experiments. Photoperiod was set to a 12:12 h light-dark cycle and fish  
124 were housed in large fiberglass tanks (~3.5-10 m<sup>3</sup>) supplied with flow-through seawater from an  
125 inshore intake; the average water temperature at the time of experiments was 17°C. Aeration was  
126 provided to ensure normoxic conditions in all tanks (>90% air saturation of O<sub>2</sub>) and these water  
127 parameters were monitored every day. All fish were fed twice a week with commercial dry  
128 pellets (Skretting; Classic Bass 9.5 mm; Stavanger, Norway) and feeding was suspended 48 h  
129 before blood sampling. The white seabass used for the determination of blood O<sub>2</sub>-binding  
130 characteristics had an average weight of 1146±96 g (*N* = 8), while those used for the β-NHE  
131 experiments had an average weight of 357±27 g (*N* = 6). Animal husbandry and all experimental  
132 procedures were in strict compliance with the guidelines by the Institutional Animal Care and  
133 Use Committee (IACUC) and approved by the Animal Care Program at the University of  
134 California San Diego (Protocol no. S10320).

### 135 *Blood sampling*

136 White seabass were moved individually into darkened boxes supplied with air and flow-  
137 through seawater, 24 h prior to blood sampling. The next day the water supply was shut off and  
138 the fish were anesthetized by carefully pouring a diluted benzocaine solution (Fisher Scientific,  
139 Acros 150785000; Waltham, USA; concentrated stock made up in ethanol) into the box without  
140 disturbing the fish, for a final concentrations of 70 mg l<sup>-1</sup> benzocaine (<0.001% ethanol). After  
141 visible loss of equilibrium, fish were transferred to a surgery table, positioned ventral-side-up  
142 and their gills were perfused with water containing a maintenance dose of anesthetic (30 mg l<sup>-1</sup>  
143 benzocaine). Blood sampling was by caudal puncture and 3 ml of blood were collected into a  
144 heparinized syringe. This procedure ensured minimal disturbance of the fish (25), which can  
145 decrease blood pH due to air-exposure (respiratory acidosis) and due to anaerobic muscle  
146 contractions during struggling (metabolic acidosis). After sampling, the fish were recovered and  
147 returned to their holding tank, and each individual was only sampled once. In the lab, the blood  
148 was centrifuged at 500 g for 3 min to separate the plasma from the blood cells. The plasma was  
149 collected in a bullet tube and stored over-night at 4°C. To remove any catecholamines released

150 during sampling, the blood cells were rinsed three times in cold Cortland's saline (in mM: NaCl  
151 147, KCl 5.1, CaCl 1.6, MgSO<sub>4</sub> 0.9, NaHCO<sub>3</sub> 11.9, NaH<sub>2</sub>PO<sub>4</sub> 3, glucose 5.6; adjusted to the  
152 measured plasma characteristics in white seabass of 345 mOsm and pH 7.8) and the buffy coat  
153 was aspirated generously to remove white blood cells and platelets. Finally, the pellet was re-  
154 suspended in 10 volumes of fresh saline to allow the RBCs to return to a resting state and stored  
155 aerobically on a tilt-shaker, over-night, at 17°C (26).

### 156 *Blood O<sub>2</sub>-binding characteristics*

157 The next day, RBCs were rinsed with saline three times and re-suspended in their native  
158 plasma at a hematocrit of 5%; this value was chosen based on preliminary trials and yields an  
159 optic density that allows for spectrophotometric measurements of Hb-O<sub>2</sub> binding characteristics  
160 (~0.6 mM Hb). A volume of 1.4 ml of blood was loaded into a glass tonometer at 17°C and  
161 equilibrated to arterial gas tensions (21 kPa PO<sub>2</sub>, 0.3 kPa PCO<sub>2</sub> in N<sub>2</sub>) from a custom-mixed gas  
162 cylinder (Praxair; Danbury, USA). After one hour, 2 µl of blood were removed from the  
163 tonometer and loaded into the diffusion chamber of a spectrophotometric blood analyzer (BOBS,  
164 Loligo Systems; Viborg, Denmark). The samples were equilibrated to increasing PO<sub>2</sub> tensions  
165 (0.5, 1, 2, 4, 8, 16 and 21 kPa PO<sub>2</sub>) from a gas mixing system (GMS, Loligo), in two-minute  
166 equilibration steps and the absorbance was recorded once every second at 190-885 nm. At the  
167 beginning and end of each run, the sample was equilibrated to high (99.7 kPa PO<sub>2</sub>, 0.3 kPa PCO<sub>2</sub>  
168 in N<sub>2</sub> for 8 min) and low (0 kPa PO<sub>2</sub>, 0.3 kPa PCO<sub>2</sub> in N<sub>2</sub> for 8 min) PO<sub>2</sub> conditions; for the  
169 calculation of Hb-O<sub>2</sub> saturation from raw absorbance values, it was assumed that Hb was fully  
170 oxygenated or deoxygenated under the two conditions, which was confirmed by inspecting the  
171 absorption spectra (all raw data are deposited online). A PCO<sub>2</sub> of 0.3 kPa was maintained  
172 throughout these trials to prevent RBC pH<sub>i</sub> from increasing above physiologically relevant levels  
173 and this value was chosen to match that measured in the arterial blood of rainbow trout  
174 (*Oncorhynchus mykiss*) *in vivo* (27). All custom gas mixtures were validated by measuring PO<sub>2</sub>  
175 with an FC-2 Oxzilla and PCO<sub>2</sub> with a CA-10 CO<sub>2</sub> analyzer (Sable Systems, North Las Vegas,  
176 USA) that were calibrated daily against high purity N<sub>2</sub>, air, or 5% CO<sub>2</sub> in air.

177 An additional 250 µl of blood were removed from the tonometer to measure blood  
178 parameters as follows. Hematocrit (Hct) was measured in triplicate in microcapillary tubes  
179 (Drummond Microcaps, 15 µl; Parkway, USA), after centrifuging at 10,000 g for 3 min. Hb was  
180 measured in triplicate using the cyano-methemoglobin method (Sigma-Aldrich Drabkin's



181 D5941; St. Louis, USA) and an extinction coefficient of  $10.99 \text{ mmol cm}^{-1}$  (28). Blood pH was  
182 measured with a thermostatted microcapillary electrode at  $17^\circ\text{C}$  (Fisher Accumet 13-620-850;  
183 Hampton, USA; with Denver Instruments UB-10 meter; Bohemia, USA), calibrated daily against  
184 precision pH buffers (Radiometer S11M007, S1M004 and S11M002; Copenhagen, Denmark).  
185 Thereafter, the blood was centrifuged to separate plasma and RBCs and total  $\text{CO}_2$  content  
186 ( $\text{TCO}_2$ ) of the plasma was measured in triplicate with a Corning 965 (Midland, USA). The RBCs  
187 in the pellet were lysed by three freeze-thaw cycles in liquid nitrogen and  $\text{pH}_i$  was measured in  
188 the lysate as described for  $\text{pH}_e$  (29). After completing these measurements, the  $\text{PCO}_2$  in the  
189 tonometer was increased in steps from 0.3 to 2.5 kPa and, each time, OECs and blood parameters  
190 were measured as described above.

#### 191 *RBC swelling after $\beta$ -adrenergic stimulation*

192 After storage of blood samples over-night in saline, the RBCs were rinsed three times in  
193 fresh saline and re-suspended in their native plasma at a Hct of 25%. A volume of 1.8 ml was  
194 loaded into a tonometer and equilibrated to 3 kPa  $\text{PO}_2$  and 1 kPa  $\text{PCO}_2$  in  $\text{N}_2$  at  $17^\circ\text{C}$  for one  
195 hour; similar hypoxic and acidotic conditions have been shown to promote  $\beta$ -NHE activity in  
196 other teleost species (30, 31). After one hour, an initial subsample of blood was taken and Hct,  
197 Hb,  $\text{pH}_e$  and  $\text{pH}_i$  were measured as described above. Thereafter, the blood was split into aliquots  
198 of 600  $\mu\text{l}$  that were loaded into individual tonometers and treated with either: i) a carrier control  
199 (0.25% dimethyl sulfoxide, DMSO; VWR BDH 1115; Radnor, USA), ii) the  $\beta$ -adrenergic  
200 agonist isoproterenol (ISO; Sigma I6504; 10  $\mu\text{M}$  final concentration, which stimulates maximal  
201  $\beta$ -NHE activity in rainbow trout; , 19), or iii) ISO plus the NHE inhibitor amiloride (ISO+Am;  
202 Sigma A7410; 1 mM, according to 32). These treatments were staggered so that samples from  
203 each tonometer could be taken for the measurements of blood parameters at 10, 30 and 60 mins  
204 after drug additions.

205 To collect RBC samples for immunocytochemistry, the above tonometry trial was  
206 repeated with RBCs that were suspended in saline instead of plasma; this step was necessary as  
207 initial trials showed that plasma proteins interfered with the quality of cell fixations. Subsamples  
208 were removed from individual tonometers at the initial and 60 min time points. A volume of 60  
209  $\mu\text{l}$  was immediately re-suspended in 1.5 ml ice-cold fixative (3% paraformaldehyde, 0.175 %  
210 glutaraldehyde in 0.6 x phosphate buffered saline with 0.05 M sodium cacodylate buffer; made  
211 up from Electron Microscopy Sciences RT15949, Hatfield, USA) and incubated for 60 min on a



212 revolver rotator at 4°C. After fixation, cells were washed three times in 1 x phosphate Buffered  
213 Saline (PBS, Corning 46-013-CM, Corning, USA) and stored at 4°C for processing (after visual  
214 inspection of cell morphology the fixation resulted in satisfactory results for  $N = 4$  out of 6 fish).  
215 An additional subsample of 100  $\mu$ l was removed from the tonometers and centrifuged to remove  
216 the saline. The RBC pellet was re-suspended in 5 volumes of lysis buffer containing 1 mM DL-  
217 Dithiothreitol (DTT; Thermo Fisher R0861; Waltham, USA), 1 mM phenylmethylsulfonyl  
218 fluoride (PMSF; Sigma P7626) and 10 mM benzamidine hydrochloride hydrate (BHH; Sigma  
219 B6506) in PBS. The RBCs were lysed by three cycles of freeze-thawing in liquid nitrogen, the  
220 lysate was centrifuged at 500 g for 10 min at 4°C and the supernatant was frozen at -80°C for  
221 Western blot processing.

#### 222 *Hb-O<sub>2</sub> binding after $\beta$ -adrenergic stimulation*

223 An additional aliquot of RBCs was re-suspended in native plasma at a Hct of 5%.  
224 Volumes of 300  $\mu$ l were loaded into one of four tonometers and equilibrated to arterial gas  
225 tensions at 17°C (as described previously) and treated with either: i) a carrier control (DMSO;  
226 0.25%), ii) ISO (10  $\mu$ M), or iii) ISO+Am (1 mM). These treatments were staggered to allow for  
227 standardized measurements at 60 min after drug additions, when 2  $\mu$ l of blood were removed  
228 from the tonometer and loaded into the BOBS for real-time measurements of Hb-O<sub>2</sub> saturation  
229 during a respiratory acidosis. Therefore, the blood was exposed to stepwise increases in PCO<sub>2</sub>  
230 (0.3, 0.5, 1, 1.5, 2 and 3 kPa) allowing for two minutes of equilibration at each step; preliminary  
231 trials showed full equilibration to the new PCO<sub>2</sub> after ~1 min and absorbance remained constant  
232 thereafter. As described previously, this protocol also included initial and final calibration steps,  
233 at which the sample was fully O<sub>2</sub>-saturated and then desaturated. A first trial was performed in  
234 normoxia (21 kPa PO<sub>2</sub>) and then a second sample was loaded from the same tonometer for an  
235 additional run under hypoxic conditions (3 kPa PO<sub>2</sub>). The PO<sub>2</sub> value in these hypoxic runs was  
236 chosen to yield a Hb-O<sub>2</sub> saturation close to P<sub>50</sub> and was informed from the previous  
237 measurements of Hb-O<sub>2</sub> binding characteristics. Finally, 250  $\mu$ l of blood were removed from the  
238 tonometer for the measurement of blood parameters, as described previously.

#### 239 *Subcellular localization of RBC $\beta$ -NHE*

240 Fixed RBCs were permeabilized in 1.5 ml 0.1% triton-X100 (VWR Amresco 1421C243)  
241 in PBS for 15 min at room temperature on a revolver rotator. Thereafter, the RBCs were blocked  
242 for auto-fluorescence in 100 mM glycine in PBS for 15 min, after which the cells were rinsed

243 three times in PBS. For immunocytochemistry, 200  $\mu$ l of these fixed RBCs were re-suspended in  
244 a blocking buffer containing 3% bovine serum albumin (VWR 0332) and 1% normal goat serum  
245 (Lampire Biological Laboratories 7332500; Pipersville, USA) in PBS and incubated for six  
246 hours on a rotator. Primary antibodies were added directly into the blocking buffer and incubated  
247 on a rotator over-night at 4°C. A monoclonal mouse anti-*Tetrahymena*  $\alpha$ -tubulin antibody  
248 (deposited by Frankel, J. and Nelsen, E.M at the Developmental Studies Hybridoma Bank,  
249 DSHB12G10; Iowa City, USA) was used at 0.24  $\mu$ g ml<sup>-1</sup> and a custom, polyclonal, affinity-  
250 purified, rabbit anti-rainbow trout  $\beta$ -NHE (epitope: MERRVSVMERMSH) was used at 0.02  
251  $\mu$ g ml<sup>-1</sup>. After primary incubations the RBCs were washed three times in PBS and incubated for  
252 three hours on a rotator at room temperature in blocking buffer containing secondary antibodies:  
253 1:500 goat anti-mouse (AlexaFlour 568; Thermo Fisher Life Technologies A-11031), 1:500 goat  
254 anti-rabbit (AlexaFlour 488; A-11008) and 1:1000 4',6-diamidino-2-phenylindole (DAPI; Roche  
255 10236276001; Basel, Switzerland). After secondary incubations, RBCs were washed three times  
256 and were re-suspended in PBS. To validate the  $\beta$ -NHE antibody, controls were performed by  
257 leaving out the primary antibody and by pre-absorbing the primary antibody with its pre-  
258 immune-peptide. All images were acquired with a confocal laser-scanning fluorescence  
259 microscope (Zeiss Observer Z1 with LSM 800, Oberkochen, Germany) and ZEN blue edition  
260 software v.2.6. For super-resolution imaging the cells were re-suspended in PBS with a mounting  
261 medium (Thermo Fisher Invitrogen ProLong P36980) and acquisition was with the Zeiss  
262 AiryScan detector system. To ensure that images were comparable, the acquisition settings were  
263 kept identical between the different treatments and between treatments and the controls. Optical  
264 sectioning and three-dimensional (3D) reconstructions of single RBCs from the different  
265 treatments were processed with the Imaris software v.9.0. (Oxford Instruments, Abingdon, UK)  
266 and rendered into movies.

### 267 *Molecular $\beta$ -NHE characterization*

268 For Western blotting, RBC crude homogenates were thawed and centrifuged at 16,000 g  
269 for one hour at 4°C to obtain a supernatant containing the cytoplasmic fraction and a pellet  
270 containing a membrane-enriched fraction that was re-suspended in 100  $\mu$ l of lysis buffer. The  
271 protein concentration of all three fractions was measured with the Bradford's assay (BioRad  
272 5000006; Hercules, USA). Samples were mixed 1:1 with Laemmli's sample buffer (BioRad 161-  
273 0737) containing 10% 2-Mercaptoethanol (Sigma M3148) and were heated to 75°C for 15 min.

274 Sample loading was at 5  $\mu\text{g}$  protein from each fraction for the detection of  $\beta$ -NHE and 60  $\mu\text{g}$   
275 protein from crude homogenate for the detection of  $\alpha$ -tubulin, into the lanes of a 5% stacking-  
276 and 10% separating polyacrylamide gel (Biorad, MiniProtean Tetra cell). The proteins were  
277 separated at 60 V for 30 min and 150 V until the Hb fraction ( $\sim 16$  kDa) ran out the bottom of the  
278 gel ( $\sim 60$  min); previous trials had shown that the high Hb content of these lysates may bind some  
279 antibodies non-specifically. The proteins were transferred onto a Immun-Blot polyvinylidene  
280 difluoride membrane (PVDF; BioRad) using a semi-dry transfer cell (Bio-Rad Trans-Blot SD)  
281 over-night, at 90 mA and  $4^\circ\text{C}$ . PVDF membranes were blocked over-night, on a shaker at  $4^\circ\text{C}$  in  
282 tris-buffered saline with 1% tween 20 (TBS-T; VWR Amresco ProPure M147) and  $0.1\text{ g ml}^{-1}$   
283 skim milk powder (Kroger; Cincinnati, USA). Primary antibodies were made up in blocking  
284 buffer and mixed on a shaker at  $4^\circ\text{C}$ , over-night, before applying to the membranes. The anti- $\alpha$   
285 tubulin antibody was used at  $4.7\text{ ng ml}^{-1}$ , the anti- $\beta$ -NHE antibody at  $0.42\text{ ng ml}^{-1}$ , and controls at  
286 a peptide concentration exceeding that of primary antibody by 10:1. Primary incubations were  
287 for four hours on a shaker at room temperature and membranes were rinsed three times in TBS-T  
288 for 5 min. Secondary incubations were with either an anti-rabbit or mouse, horse-radish  
289 peroxidase conjugated secondary antibody (BioRad 1706515 and 1706516) for three hours on a  
290 shaker at room temperature. Finally, the membranes were rinsed three times in TBS-T for 5 min  
291 and the proteins were visualized by enhanced chemiluminescence (BioRad, Clarity 1705061) in a  
292 BioRad Universal III Hood with Image Lab software v.6.0.1. Protein sizes were determined  
293 relative to a precision dual-colour protein ladder (BioRad 1610374).

294 The white seabass  $\beta$ -NHE sequence was obtained by transcriptomics analysis of gill  
295 samples that were not perfused to remove the blood and these combined gill and RBC tissue  
296 samples were stored in RNA later for processing. Approximately  $50\text{ }\mu\text{g}$  of sample were  
297 transferred into 1 ml of Trizol reagent (Thermo Fisher 15596026) and were homogenized on ice  
298 with a handheld motorized mortar and pestle (Kimble Kontes, Dusseldorf, Germany). These  
299 crude homogenates were centrifuged at  $1000\text{ g}$  for 1 min and the supernatant was collected for  
300 further processing. RNA was extracted in RNA spin columns (RNAEasy Mini; Qiagen, Hilden,  
301 Germany) and treated with DNase I (ezDNase; Thermo Fisher, 11766051) to remove traces of  
302 genomic DNA. RNA quantity was determined by spectrophotometry (Nanodrop 2000; Thermo  
303 Fisher) and RNA integrity was determined with an Agilent 2100 Bioanalyzer (Agilent; Santa  
304 Clara, USA). Poly-A enriched complementary DNA (cDNA) libraries were constructed using the

305 TruSeq RNA Sample Preparation Kit (Illumina; San Diego, USA). Briefly, mRNA was selected  
306 against total RNA using Oligo(dt) magnetic beads and the retained RNA was chemically sheared  
307 into short fragments in a fragmentation buffer, followed by first- and second-stand cDNA  
308 synthesis using random hexamer primers. Illumina adaptor primers (Forward P5-Adaptor,  
309 5'AATGATACGGCGACCACCGAGA3'; Reverse P7-Adaptor 5'  
310 CGTATGCCGTCTTCTGCTTG 3') were then ligated to the synthesized fragments and  
311 subjected to end-repair processing. After agarose gel electrophoresis, 200-300 bp insert  
312 fragments were selected and used as templates for downstream PCR amplification and cDNA  
313 library preparation. The combined gill and RBC samples (1 µg RNA) were sent for RNAseq  
314 Poly-A sequencing with the Illumina NovoSeq™ 6000 platform (Novogene; Beijing, China) and  
315 raw reads are made available on NCBI (PRJNA722314).

316 RNAseq data was used to generate a *de novo* transcriptome assembly which was mined  
317 for white seabass isoforms of the Slc9a1 protein family using methods previously described (33).  
318 Briefly, raw reads were analyzed, trimmed of adaptor sequences, and processed with the  
319 OpenGene/fastp software (34), to remove reads: i) of low quality (PHRED quality score < 20),  
320 ii) containing >50% unqualified bases (base quality < 5), and iii) with >10 unknown bases. Any  
321 remaining unpaired reads were discarded from downstream analysis and quality control metrics  
322 were carried out before and after trimming (raw reads 80.07 x 10<sup>6</sup>; raw bases 12.01 Gb; clean  
323 reads 79.44 x 10<sup>6</sup>, clean bases 11.84 Gb, clean reads Q30 95.26%; GC content 46.67%).  
324 Thereafter, fastq files were merged into a single data set, normalized, and used for *de novo*  
325 construction of a combined gill and RBC transcriptome using the Trinity v2.6.6 software.  
326 Normalization and assembly were performed using the NCGAS (National Centre for Genome  
327 Analysis Support) *de novo* transcriptome assembly pipeline ([github.com/NCGAS/de-novo-](https://github.com/NCGAS/de-novo-transcriptome-assembly-pipeline/tree/master/Project_Carbonate_v4)  
328 [transcriptome-assembly-pipeline/tree/master/Project\\_Carbonate\\_v4](https://github.com/NCGAS/de-novo-transcriptome-assembly-pipeline/tree/master/Project_Carbonate_v4)) on the Carbonate High  
329 Performance Computing cluster at Indiana University. For assembly, minimum kmer coverage  
330 was set to three and the minimum number of reads needed to glue two inchworm contigs  
331 together, was set to four (35). The resulting nucleotide FASTA file was translated into six  
332 protein reading frames using BBMap (36), which were mined for the NHE-like proteins using  
333 HMMER3 v.3.0 ([hmmer.org](http://hmmer.org)) by querying the *de novo* assembly against a hidden markov model  
334 (HHM) homology matrix generated from 132 aligned protein sequences of the vertebrate NHE  
335 family (Slc9a1 – Slc9a9; for accession numbers see Table S1 of the supplement at:

336 doi.org/10.6084/m9.figshare.14934405.v1). Sequences were aligned using MUSCLE (37) in  
337 SeaView (38, 39), with NHE2 from *Caenorhabditis elegans* as an outgroup, and results were  
338 refined using GBlocks (40) according to the parameters specified previously (41). Phylogenetic  
339 analysis was conducted on the Cyberinfrastructure for Phylogenetic Research (CIPRES) Science  
340 Gateway (42) using the RAxML software v.8.2.12 (43) with the LG evolutionary and  
341 GTRGAMMA models (44). Branch support was estimated by bootstraps with 450 replications  
342 and the constructed tree was edited in FigTree v.1.4.4. Finally, the open reading frame of the  
343 white seabass  $\beta$ -NHE sequence (predicted 747 amino acids), was analyzed for the presence of  
344 the Kozak nucleic acid motifs (5'-(gcc)gccRccAUGG-3'; 45) immediately upstream of putative  
345 start codons, using the ATGpr software (46).

346 To confirm the expression of the  $\beta$ -NHE in the RBCs of white seabass, an additional  
347 blood sample of 1 ml was collected and processed as described previously. RBCs were lysed by  
348 repeatedly passing them through a 23G needle and RNA extraction was on 50  $\mu$ g of RBCs by  
349 standard Trizol and chloroform extraction following the kit instructions. Isolated RNA was  
350 treated with DNase I and 1  $\mu$ g RNA was used to synthesize first-strand cDNA using SuperScript  
351 IV reverse transcriptase (Thermo Fisher 18090010). Full-length cDNA sequences were obtained  
352 in 35 cycles of PCR reactions with Phusion DNA polymerase (New England Biolabs, Ipswich,  
353 USA; MO531L) and specific primers designed against the sequence of the phylogenetically  
354 characterized white seabass  $\beta$ -NHE obtained from the combined gill and RBC transcriptome  
355 (Integrated DNA Technologies, Coralville, Iowa; F: 5'TCC CGT ACT ATC CTC ATC TTC A-  
356 3' R: 5'-CCT CTG CTC TCT GAA CTG TAA AT-3'). Amplicons were analyzed by gel  
357 electrophoresis (Bio-Rad ChemiDoc) that confirmed the presence of a single band (2372 bp; Fig.  
358 S1). A-overhangs were added to Phusion products with one unit Taq polymerase (New England  
359 Biolabs; MO267S) followed by 10 min incubation at 72°C. Products were cloned (TOPO TA  
360 Cloning Kit/pCR 2.1-TOPO Vector; Invitrogen; K4500) and the ligated product was transformed  
361 into TOP10 chemically competent *E. coli* cells (Invitrogen; K457501) according to manufacturer  
362 specifications. Following over-night incubation at 37°C, single colonies of transformants were  
363 grown in Luria-Bertani (LB) broth over-night on a shaking incubator (37°C, 220 rpm; Barnstead  
364 MaxQ 4000). Plasmid DNA was isolated (PureLink Quick Plasmid Miniprep kit; Invitrogen  
365 K210010) according to manufacturer specifications and inserts were sequenced to confirm their  
366 identity and uploaded to NCBI (MW962257).

367 *Calculations and statistical analysis*

368 All data were analyzed with R v.4.0.4 (47) in RStudio v.1.4.1106 (48) and figures were  
369 created with the ggplot2 package (49). Normality of the residuals was tested with the Shapiro-  
370 Wilk test (stat.desc function in R) and homogeneity of variances was confirmed with the  
371 Levene's test (leveneTest function in R). Deviations from these parametric assumptions were  
372 corrected by transforming the raw data. All R source code is made publicly available  
373 ([doi.org/10.6084/m9.figshare.14934405.v1](https://doi.org/10.6084/m9.figshare.14934405.v1)).

374 To determine the blood O<sub>2</sub>-binding characteristics, Hb P<sub>50</sub> and n<sub>H</sub> values were those  
375 determined with the BOBS software v.1.0.20 (Loligo) and oxygen equilibrium curves (OEC)  
376 were generated by fitting a two parameter Hill function to the mean P<sub>50</sub> and n<sub>H</sub> for 8 individual  
377 fish. The main effects of PCO<sub>2</sub> on P<sub>50</sub> and n<sub>H</sub> were analyzed with ACOVA ( $P < 0.05$ ,  $N = 8$ ).  
378 Plasma [HCO<sub>3</sub><sup>-</sup>] was calculated from TCO<sub>2</sub> by subtracting the molar [CO<sub>2</sub>] calculated from the  
379 dissociation constant and solubility coefficients in plasma at 17°C and the corresponding sample  
380 pH (6). The Bohr effects relative to pH<sub>i</sub> and pH<sub>e</sub>, the relationship between RBC pH<sub>i</sub> and pH<sub>e</sub> and  
381 the non-bicarbonate buffer capacity of whole blood were determined by linear regression  
382 analysis, results of which are shown in detail in the supplement (Fig. S2A-D). The average  
383 values for these blood characteristics are shown in the main text and were calculated as the  
384 average slopes across all individuals.

385 In the RBC swelling trial, mean cell Hb was calculated as [Hb] divided by Hct as a  
386 decimal. Since Hb is a membrane impermeable solute, MCHC is used as a common indicator of  
387 RBC swelling. Main effects of drugs (DMSO, ISO and ISO+Am), time (10, 30 and 60 min) and  
388 their interaction (drug×time) on Hct, [Hb], MCHC, pH<sub>e</sub> and pH<sub>i</sub> were determined by two-way  
389 ANOVAs (lm and Anova functions in R;  $N = 5-6$ ;  $P < 0.05$ ) and multiple comparisons were  
390 conducted with t-tests (pairwise.t.test function in R) and controlling the false detection likelihood  
391 (FDR) with a Benjamini-Hochberg correction (p.adjust function in R).

392 The effect of RBC β-adrenergic stimulation on Hb-O<sub>2</sub> binding was assessed by analyzing  
393 the absorbance data from the BOBS in R (R source code available at [github.com/tillharter/White-](https://github.com/tillharter/White-Seabass-beta-NHE)  
394 [Seabass-beta-NHE](https://github.com/tillharter/White-Seabass-beta-NHE)). In brief, the absorbances recorded at 430 nm were divided by the isosbestic  
395 wavelength of 390 nm (where absorbance is independent of Hb-O<sub>2</sub> binding), and these ratios  
396 were used as the raw data for subsequent analyses. For each trace, the ten final absorbance ratios  
397 at each equilibration step were averaged (i.e. 10 s) and Hb-O<sub>2</sub> saturation was calculated relative



398 to the absorbance at the two initial calibration conditions (i.e. high: 99.7 kPa PO<sub>2</sub>, 0.3 kPa PCO<sub>2</sub>;  
399 and low: 0 kPa PO<sub>2</sub>, 0.3 kPa PCO<sub>2</sub>), assuming full saturation or desaturation of Hb, respectively.  
400 These calibration values were measured again at the end of each trial and a linear correction of  
401 drift was performed for each sample. The resulting values for Hb-O<sub>2</sub> saturation were plotted  
402 against PCO<sub>2</sub> and several non-linear models were fit to the data (Michaelis-Menten, Exponential  
403 and Hill). The model with the best fit (lowest AIC) was a three-parameter Hill function that was  
404 applied to each individual trace. The parameter estimates from this model yielded the maximal  
405 reduction in Hb-O<sub>2</sub> saturation (Max. ΔHb-O<sub>2</sub> sat.; %) in normoxia (21 kPa PO<sub>2</sub>) and hypoxia (3  
406 kPa PO<sub>2</sub>), and the PCO<sub>2</sub> at which this response was half-maximal (EC<sub>50</sub>PCO<sub>2</sub>; kPa). The main  
407 effects of drugs (DMSO, ISO and ISO+Am), O<sub>2</sub> (normoxia and hypoxia) and their interaction  
408 (drug×O<sub>2</sub>), on the parameter estimates from the Hill functions were determined by two-way  
409 ANOVAs (lm and Anova functions in R; *N* = 6; *P* < 0.05). When significant main effects were  
410 detected, multiple comparisons were conducted with t-tests (pairwise.t.test function in R) and  
411 controlling the false detection likelihood (FDR) with a Benjamini-Hochberg correction (p.adjust  
412 function in R). The Root effect was determined from the non-linear model, as the Max. ΔHb-O<sub>2</sub>  
413 sat. of the control treatment (DMSO). To quantify the relative changes in Hb-O<sub>2</sub> saturation  
414 (ΔHb-O<sub>2</sub> sat.) due to drug treatments, data were expressed relative to the paired measurements in  
415 the DMSO treatment for each individual fish and relative to the initial Hb-O<sub>2</sub> saturation at 0.3  
416 kPa PCO<sub>2</sub> (i.e. 95.6 and 55.0% Hb-O<sub>2</sub> saturation in normoxia and hypoxia, respectively). All  
417 data are presented as means±s.e.m.



## 418 **Results**

### 419 *Blood O<sub>2</sub>-binding characteristics*

420 The blood O<sub>2</sub>-binding characteristics of white seabass are summarized in Figure 1. When  
421 PCO<sub>2</sub> was increased from arterial tension (0.3 kPa) to severe hypercapnia (2.5 kPa) Hb P<sub>50</sub>  
422 increased significantly from 2.9±0.1 to 11.8±0.3 kPa. At the same time, the cooperativity of Hb-  
423 O<sub>2</sub> binding, expressed by n<sub>H</sub>, decreased significantly from 1.52±0.04 to 0.84±0.03, which was  
424 reflected in a change in the shape of the OECs from sigmoidal to hyperbolic. Over the tested  
425 range of PCO<sub>2</sub>, white seabass displayed a Bohr coefficient of -0.92±0.13 when expressed relative  
426 to the change in pH<sub>e</sub> and -1.13±0.11 when expressed relative to the change in RBC pH<sub>i</sub> (Fig.  
427 S2A and B). In addition to the reduction in Hb-O<sub>2</sub> affinity at elevated PCO<sub>2</sub>, white seabass blood  
428 also displayed a large Root effect, where the non-linear model predicted a maximal reduction of  
429 Hb-O<sub>2</sub> carrying capacity of 52.4±1.8%. The relationship between pH<sub>i</sub> and pH<sub>e</sub> had a slope of  
430 0.67±0.07 (Fig. S2C), reflecting the higher buffer capacity of the intracellular space. The non-  
431 bicarbonate buffer capacity of white seabass whole blood was -2.43±0.56 mmol l<sup>-1</sup> pH<sub>e</sub><sup>-1</sup> at a Hct  
432 of 5% (Fig. S2D). By correcting this value for the higher Hct *in vivo*, according to Wood et al.  
433 (50), white seabass with a Hct of 25% are expected to have a whole blood non-bicarbonate  
434 buffer capacity of -9.68 mmol l<sup>-1</sup> pH<sub>e</sub><sup>-1</sup>.

### 435 *RBC swelling after β-adrenergic stimulation*

436 The β-adrenergic stimulation of white seabass blood with ISO induced changes in the  
437 measured blood parameters (Fig. 2). Significant main effects of drug, time and their interaction  
438 (drug×time), indicate that Hct was affected by the experimental treatments (Fig. 2A). A large  
439 increase in Hct was observed in ISO-treated blood that was absent in ISO+Am and DMSO-  
440 treated RBCs. In addition, a main effect of drug treatments on MCHC indicated that the increase  
441 in Hct after ISO addition was due to swelling of the RBCs (Fig. 2B), whereas [Hb] was not  
442 affected by the treatments (Fig. S3). Significant main effects of drug and time were also detected  
443 for pH<sub>e</sub>, where a large extracellular acidification was observed in ISO-treated blood, relative to  
444 the DMSO and ISO+Am treatments (Fig. 2C). No significant main effect of drug or time were  
445 observed on RBC pH<sub>i</sub>, but multiple comparisons indicated a trend for a higher pH<sub>i</sub> in ISO  
446 compared to DMSO treated blood (*P* = 0.081; Fig. 2D). Differential interference contrast (DIC)  
447 images confirmed a normal morphology of the RBCs at the beginning and the end of the trials,  
448 thus validating the fixation procedure. Swelling was observed in ISO-treated RBCs, relative to

449 initial measurements, or DMSO and ISO+Am-treated cells (Fig. 2E-H). The swelling of ISO-  
450 treated RBCs occurred largely along the z-axis of the cells (indicated by the arrows), whereas no  
451 visible distortion was observed in the x-y directions.

#### 452 *Molecular $\beta$ -NHE characterization*

453 The combined gill and RBC *de novo* transcriptome of white seabass contained nine  
454 Slc9a1 transcripts and phylogenetic analysis placed these sequences within well-supported clades  
455 of the NHE family tree (Fig. 3). Importantly, one of these white seabass transcripts grouped with  
456 the Slc9a1b sequences from other teleost fishes, supporting its classification as a white seabass  
457  $\beta$ -NHE. Results from RT-PCR, cloning and sequencing confirmed the expression of  $\beta$ -NHE  
458 mRNA in isolated white seabass RBCs. A search for the Kozak nucleic acid motif in the open  
459 reading frame of the white seabass  $\beta$ -NHE sequence yielded the five most likely potential start  
460 codons, including one that would produce a 66 kDa protein (Table S2). This size closely  
461 matched the single band that was specifically recognized by the polyclonal  $\beta$ -NHE antibody in  
462 Western blots with crude homogenate, cytosolic and membrane-enriched fractions of a white  
463 seabass RBC lysate (Fig. S4A); whereas no immunoreactivity was observed in lanes where the  
464 antibody had been incubated with its pre-immune peptide. The anti- $\alpha$ -tubulin antibody detected a  
465 single band in the RBC crude homogenate, at the predicted size of 54 kDa (Fig. S4B). Finally,  
466 the white seabass  $\beta$ -NHE protein sequence shared seven consecutive amino acids with the  
467 peptide used to raise the polyclonal antibodies (Fig. S4C), which is sufficient for specific  
468 antibody binding (51). More importantly, the antigen peptide sequence was absent in the other  
469 eight white seabass NHE isoforms, ruling out non-specific antibody recognition of these NHEs.

#### 470 *Subcellular localization of RBC $\beta$ -NHE*

471 The subcellular location of  $\beta$ -NHE protein in white seabass RBCs was determined by  
472 immunofluorescence cytochemistry and super-resolution confocal microscopy (Fig. 4). In  
473 DMSO-treated RBCs, the  $\beta$ -NHE immunolabelling was most intense in intracellular vesicle-like  
474 structures, and weaker at the plasma membrane. There was substantial heterogeneity in the  
475 staining pattern for  $\beta$ -NHE in these control cells, with varying amounts of intracellular and  
476 membrane staining. In ISO-treated RBCs, the staining pattern for  $\beta$ -NHE was more  
477 homogeneous and most cells showed intense immunoreactivity for  $\beta$ -NHE in the membrane that  
478 co-localized with  $\alpha$ -tubulin in the marginal band, and the intracellular, vesicle-like staining that  
479 was observed in the control cells was reduced (see Fig. S5 for an overview image with more

480 cells). In contrast, ISO-treated cells that were incubated without the primary antibody or where  
481 the antibody was pre-absorbed with its pre-immune-peptide showed no immunoreactivity for  $\beta$ -  
482 NHE (Fig. S6). Finally, optical sectioning and three-dimensional reconstruction of these RBCs  
483 confirmed that the membrane staining for  $\beta$ -NHE occurred in a single plane and co-localized  
484 with  $\alpha$ -tubulin in the marginal band (see 3D movies S1 and S2).

#### 485 *Hb-O<sub>2</sub> binding after $\beta$ -adrenergic stimulation*

486 To characterize the protective effect of RBC  $\beta$ -NHE activation on Hb-O<sub>2</sub> binding, blood  
487 samples were first equilibrated to 21 kPa PO<sub>2</sub> and 0.3 kPa PCO<sub>2</sub> in tonometers and no significant  
488 effects of drug treatment (DMSO, ISO or ISO+Am) were observed on any of the measured blood  
489 parameters (Fig. S7); average values were: Hct  $5.20 \pm 0.14\%$  ( $P = 0.095$ ), [Hb]  $0.178 \pm 0.006$  mM  
490 ( $P = 0.889$ ), MCHC  $3.46 \pm 0.15$  mM l<sup>-1</sup> RBC ( $P = 0.490$ ), pH<sub>e</sub>  $7.848 \pm 0.018$  ( $P = 0.576$ ), pH<sub>i</sub>  
491  $7.464 \pm 0.021$  ( $P = 0.241$ ). Thereafter, blood was loaded into the BOBS, where Hb-O<sub>2</sub> saturation  
492 was measured spectrophotometrically at increasing levels of a respiratory acidosis in normoxia  
493 (21 kPa PO<sub>2</sub>). As expected from the pH-sensitivity of Hb-O<sub>2</sub> binding in white seabass, an  
494 increase in PCO<sub>2</sub> from 0.3 to 3 kPa caused a severe reduction in Hb-O<sub>2</sub> saturation in all  
495 treatments via the Root effect (Fig. 5). The raw data were analyzed by fitting a three-parameter  
496 Hill model to the individual observations within each treatment and significant differences were  
497 observed in the parameter estimates that describe these models. EC<sub>50</sub>PCO<sub>2</sub> was affected by the  
498 experimental treatments, as shown in a significant main effect of drug (Fig. 6A). Multiple  
499 comparisons confirmed significant differences in EC<sub>50</sub>PCO<sub>2</sub>, which was  $0.85 \pm 0.06$  kPa in  
500 DMSO,  $0.91 \pm 0.06$  kPa in ISO+Am and  $1.08 \pm 0.06$  kPa in ISO-stimulated blood. In contrast, the  
501 magnitude of the responses, Max.  $\Delta$ Hb-O<sub>2</sub> sat., was not affected by the experimental treatments  
502 and no significant main effect of drug was detected; the average Max.  $\Delta$ Hb-O<sub>2</sub> sat. across  
503 treatments was  $-51.1 \pm 0.7\%$  (Fig. 6B).

504 When the same experiment was repeated under hypoxic conditions (3 kPa PO<sub>2</sub>), an  
505 increase in PCO<sub>2</sub> likewise caused a severe reduction in Hb-O<sub>2</sub> saturation, indicating that in white  
506 seabass, a Root effect can also be expressed at saturations around P<sub>50</sub> (Fig. 5). A significant main  
507 effect of O<sub>2</sub> indicated that cells in the hypoxic condition required a lower EC<sub>50</sub>PCO<sub>2</sub> to achieve  
508 Max.  $\Delta$ Hb-O<sub>2</sub> sat., compared to the normoxic condition (Fig. 6A). There was also a significant  
509 main effect of drug on EC<sub>50</sub>PCO<sub>2</sub> and multiple comparisons indicated a similar pattern in the  
510 individual drug effects as in the normoxic experiment, which was further confirmed by the

511 absence of a significant drug $\times$ O<sub>2</sub> interaction. Finally, a significant effect of O<sub>2</sub> on Max.  $\Delta$ Hb-O<sub>2</sub>  
512 sat. (Fig. 6B) indicated a larger response magnitude in hypoxic blood, but that was unaffected by  
513 drug treatments, and the average Max.  $\Delta$ Hb-O<sub>2</sub> sat. across treatments was  $-74.1\pm 0.1\%$ .

514 To quantify the protective effect of RBC  $\beta$ -NHE activation on Hb-O<sub>2</sub> binding during a  
515 hypercapnic acidosis, Hb-O<sub>2</sub> saturation was expressed relative to the paired measurements in the  
516 DMSO treatment for each individual fish and relative to the initial Hb-O<sub>2</sub> saturation at 0.3 kPa  
517 PCO<sub>2</sub> (i.e. 95.6 and 55.0% Hb-O<sub>2</sub> saturation in normoxia and hypoxia, respectively). In  
518 normoxia, the benefit of  $\beta$ -NHE stimulation with ISO showed a bell-shaped relationship with a  
519 maximal  $\Delta$ Hb-O<sub>2</sub> sat. of  $7.8\pm 0.02\%$  at 1 kPa PCO<sub>2</sub> (Fig. 7A). When NHEs were inhibited in  
520 ISO+Am blood,  $\Delta$ Hb-O<sub>2</sub> sat. was only  $1.9\pm 0.4\%$  at 1 kPa PCO<sub>2</sub> and significantly lower  
521 compared to the other treatments; at higher PCO<sub>2</sub> the 95% confidence intervals overlapped with  
522 the DMSO values, indicating no difference from controls. In hypoxic blood, the ISO treatment  
523 had the largest effects on  $\Delta$ Hb-O<sub>2</sub> sat. at 0.3 kPa PCO<sub>2</sub>, with maximal values of  $19.2\pm 0.0\%$  that  
524 decreased towards higher PCO<sub>2</sub> (Fig. 7B). Whereas, in the ISO+Am treatment,  $\Delta$ Hb-O<sub>2</sub> sat. was  
525  $6.4\pm 0.0\%$  at 0.3 kPa PCO<sub>2</sub>, and significant differences to the DMSO controls were only observed  
526 at PCO<sub>2</sub> below 1.5 kPa.

## 527 Discussion

528 In line with our initial hypothesis, RBC  $\beta$ -NHE activity in white seabass may greatly  
529 protect the blood O<sub>2</sub>-carrying capacity during environmentally relevant levels of hypoxia and  
530 hypercapnia. However, not all predictions were met as expected: white seabass did not have an  
531 unusually high Hb-O<sub>2</sub> affinity and thus, other aspects of their physiology are likely more  
532 important in determining their tolerance to hypoxia. Like other teleosts, white seabass had highly  
533 pH-sensitive Hbs, where a reduction in pH decreased both Hb-O<sub>2</sub> affinity via the Bohr effect and  
534 Hb-O<sub>2</sub> carrying capacity via the Root effect. Several lines of evidence corroborated the presence  
535 of a RBC  $\beta$ -NHE in white seabass and super-resolution imaging revealed, for the first time, the  
536 subcellular location of  $\beta$ -NHE protein in intracellular, vesicle-like structures and on the RBC  
537 membrane. Furthermore, adrenergic stimulation induced changes in the intracellular distribution  
538 of the  $\beta$ -NHE that may indicate a role of protein translocation in regulating  $\beta$ -NHE activity. A  
539 detailed quantification of the protective effects of RBC  $\beta$ -NHE activity, revealed the largest  
540 benefits at ~1 kPa PCO<sub>2</sub> in normoxia (21 kPa PO<sub>2</sub>), where Hb-O<sub>2</sub> saturation increased by ~8%.  
541 Whereas in hypoxia (3 kPa PO<sub>2</sub>),  $\beta$ -NHE activity had its largest effect at arterial PCO<sub>2</sub> (0.3 kPa)  
542 and enhanced Hb-O<sub>2</sub> saturation by ~20%; however, the benefits of  $\beta$ -NHE activation in hypoxia  
543 decrease rapidly at higher PCO<sub>2</sub>, revealing a potential vulnerability of white seabass to  
544 combinations of these stressors.

545 Many hypoxia tolerant vertebrates have evolved Hbs with a high affinity for O<sub>2</sub> (low Hb  
546 P<sub>50</sub> values), which helps to extract the gas from the respiratory medium (9, 52, 53). White  
547 seabass in the present study had a Hb P<sub>50</sub> of 2.9±0.1 kPa (Fig. 1), which is higher than the values  
548 typically found in hypoxia tolerant fishes, such as carp (*Cyprinus carpio*) that have Hb P<sub>50</sub> values  
549 as low as 0.5 kPa (54). In fact, the Hb P<sub>50</sub> of white seabass resemble more closely the values in  
550 the well-studied rainbow trout, of 3.3 kPa (55), a cold-stream salmonid, of no noteworthy  
551 hypoxia tolerance. However, the O<sub>2</sub>-binding affinity of Hb must strike a balance between loading  
552 O<sub>2</sub> at the gas exchange surface and unloading O<sub>2</sub> at the tissues (56). Everything else being equal,  
553 a higher Hb P<sub>50</sub> can sustain a higher PO<sub>2</sub> at the tissue capillaries, enhancing the diffusion  
554 gradient of O<sub>2</sub> to the mitochondria, which is of particular benefit to those species with a high  
555 scope for exercise (57). Thus, it seems that a high Hb-O<sub>2</sub> affinity is not part of the physiological  
556 mechanism that facilitates hypoxia tolerance in white seabass, but instead, a high tissue PO<sub>2</sub> may  
557 be important to sustain exercise performance in these active piscivores.

558 As in other teleosts, especially those in the highly-derived group of perciformes, Hb-O<sub>2</sub>  
559 binding in white seabass was highly pH-sensitive. An increase in PCO<sub>2</sub> from arterial levels (0.3  
560 kPa) to severe hypercapnia (2.5 kPa), caused a significant right-shift of the OEC (Fig. 1) via the  
561 Bohr effect, increasing P<sub>50</sub> to 11.8±0.3 kPa. When considering the corresponding changes in pH<sub>e</sub>  
562 (from 8.1 to 7.2 over the range of tested PCO<sub>2</sub>; see Fig. S2A) the Bohr coefficient in white  
563 seabass was -0.92, and slightly higher, at -1.13, when considering the changes in RBC pH<sub>i</sub> (from  
564 7.7 to 7.0: Fig. S2B). Again, these Hb-O<sub>2</sub> binding characteristics resemble closely those of  
565 rainbow trout, where P<sub>50</sub> increases to 10 kPa at 2 kPa PCO<sub>2</sub>, yielding a Bohr coefficient (relative  
566 to pH<sub>e</sub>) of -0.87 (55). A normoxic increase in PCO<sub>2</sub> caused a significant reduction in Hb-O<sub>2</sub>  
567 saturation via the Root effect, and at PCO<sub>2</sub> above 3 kPa the O<sub>2</sub>-carrying capacity of white  
568 seabass Hb was reduced by 52.4±1.8% (DMSO treatment; Fig. 6B). These results are in line with  
569 those of other teleosts, such as rainbow trout (~55%), tench (*Tinca tinca*; ~50%) and the  
570 European perch (*Perca fluviatilis*; ~70%), where the larger Root effect values may reflect the  
571 higher final PCO<sub>2</sub> used during those trials (58).

572 The Root effect is part of a specialized system of O<sub>2</sub> supply to the eye and the  
573 swimbladder of teleosts, where blood is acidified in a counter-current exchanger (the *rete*  
574 *mirabile*) to produce high PO<sub>2</sub> that bridge the large diffusion distances to the avascular retina of  
575 teleosts and inflate the swimbladder against large hydrostatic pressures (59). In the course of  
576 teleost evolution there have been numerous secondary losses of the *choroid* and swimbladder  
577 *retes*. While their presence has not directly been determined in white seabass, an ancestral state  
578 reconstruction predicts no secondary loss of either *rete* on the teleost branch leading up to the  
579 perciformes, which include the white seabass (24). In addition, all of the five independent losses  
580 of the *choroid rete* have coincided with a reduction of the Root effect below 40% (24, 60). Thus,  
581 the large Root effect of white seabass is consistent with the presence of a *choroid rete* and likely  
582 critical for maintaining a high ocular PO<sub>2</sub> that facilitates the visual acuity in these active  
583 predators (15).

584 Vertebrate Hbs are intracellular proteins and, as such, are affected by the  
585 microenvironment within the RBC cytoplasm. Teleost β-NHEs can actively modulate Hb-O<sub>2</sub>  
586 binding by controlling RBC pH<sub>i</sub> and several lines of evidence in our study indicate the presence  
587 of functional β-NHEs in white seabass RBCs. A combined gill and RBC transcriptome detected  
588 nine sequences belonging to the vertebrate NHE (Slc9a1) family and phylogenetic analysis



589 classified the white seabass Slc9a1b transcript as belonging to the larger group of teleost RBC  $\beta$ -  
590 NHEs (Fig. 3). These findings were supported by the results from RT-PCR, confirming the  
591 expression of the  $\beta$ -NHE in white seabass RBCs. Western blots with a polyclonal anti-trout  $\beta$ -  
592 NHE antibody recognized a single band at 66 kDa in white seabass RBC homogenates (Fig.  
593 S4A), which is smaller than the 84 kDa predicted based on the longest possible mRNA transcript  
594 (Table S2). However, a search for Kozak motifs revealed the five most likely potential start  
595 codons in the open reading frame of the white seabass  $\beta$ -NHE mRNA sequence, one of which  
596 predicted a protein size of 66 kDa that matches the protein size detected in Western blots. This  
597 predicted  $\beta$ -NHE isoform lacks 158 amino acids on the N-terminus, which, according to  
598 structural NHE-protein models (61), are not essential for the transporter's activity, but may  
599 determine a differential sensitivity to inhibitors (61, 62). NHE isoforms from other teleosts have  
600 also been shown to separate in Western blotting with a similar size discrepancy (63), and show  
601 differential sensitivity to amiloride and its derivatives compared to mammalian NHEs (64).

602         Adrenergic stimulation of white seabass RBCs with ISO caused a ~25% volume increase  
603 during the 60 min trials, whereas no changes in RBC volume were detected in DMSO treated  
604 cells. The swelling response was corroborated by a significant reduction in MCHC and by  
605 visually confirming the increase in cell volume under a microscope, and these results closely  
606 match previous reports of RBC swelling after adrenergic stimulation in other teleosts (23, 65,  
607 66). In addition, the ISO-induced swelling was abolished by the inhibition of NHEs in ISO+Am-  
608 treated RBCs, providing additional pharmacological support for the presence of a RBC  $\beta$ -NHE in  
609 white seabass. In ISO-treated RBCs, but not those treated with DMSO or ISO+Am, we observed  
610 a decrease in  $\text{pH}_e$ , which is the direct result of  $\text{H}^+$  excretion by NHE activity. Corresponding  
611 changes in RBC  $\text{pH}_i$  are typically smaller, due to the higher buffer capacity of the intracellular  
612 space ( $\text{pH}_i = 0.67 \pm 0.07 \times \text{pH}_e$ ; Fig. 1), and the additional freeze-thaw steps and plasma removal  
613 increase the variability of these measurements. Consequently, we were not able to resolve  
614 significant treatment effects on RBC  $\text{pH}_i$ , but a non-significant trend may point towards a small  
615 increase in RBC  $\text{pH}_i$ . Another interesting observation in these RBC swelling trials were the  
616 changes in cell morphology due to adrenergic stimulation. The increase in cell volume was  
617 largely due to an expansion along the z-axis of the cells, whereas the dimensions in the x-y axis  
618 apparently remained unaffected. The nucleated RBCs of non-mammalian vertebrates, including  
619 fish, have a marginal band, a structural component of their cytoskeleton formed by strands of  $\alpha$ -



620 tubulin that maintains their elliptical shape in the face of shear and osmotic disturbances (67).  
621 The stiffness of this marginal band (68) may be a major impediment to swelling along the x-y  
622 axis forcing the cells to widen in the z-direction.

623 Fixed RBCs from these swelling trials were studied in more detail by super-resolution  
624 microscopy and by immunolabelling  $\beta$ -NHE and  $\alpha$ -tubulin (Fig. 4). All RBCs showed  $\beta$ -NHE  
625 immunoreactivity, corroborating the presence of  $\beta$ -NHE protein in these cells. In control RBCs,  
626  $\beta$ -NHE protein was detected intracellularly and appeared to be confined to vesicles, while  
627 weaker staining was detected on the plasma membrane (Fig. 4B and S5). A similar staining  
628 pattern has been described for a NHE1-like protein in the RBCs of winter flounder  
629 (*Pseudopleuronectes americanus*; Pedersen et al., 2003). However, the immunolabelling of this  
630 NHE was with polyclonal antibodies raised against a region of the human NHE1 sequence (aa  
631 631-746) that is highly conserved with both the teleost Slc9a1a and Slc9a1b. Therefore, these  
632 previous results likely include staining of several NHE isoforms including the flounder  $\beta$ -NHE.  
633 The antibody used in the present study showed a high specificity for the white seabass  $\beta$ -NHE  
634 (Fig. S4) and a confounding detection of other RBC NHE isoforms is unlikely.

635 An important finding of our work was that the intracellular localization of  $\beta$ -NHE protein  
636 changed after adrenergic stimulation of the RBCs. In ISO-treated cells the staining pattern for  $\beta$ -  
637 NHE was more homogeneous compared to controls, with strong signal at the plasma membrane,  
638 and weaker intracellular signal (Fig. 4F and S5). Optical sectioning and 3D reconstructions of  
639 these cells clearly showed that the intense membrane staining for  $\beta$ -NHE was confined to a  
640 single plane, colocalizing with  $\alpha$ -tubulin in the marginal band, and that this staining was mostly  
641 absent in DMSO-treated cells (Movies S1 and S2). Furthermore, the use of super-resolution  
642 microscopy allowed us to discern the subcellular orientation the  $\beta$ -NHE signal, which was  
643 extracellular relative to  $\alpha$ -tubulin (Fig. 4H), thus, indicating a direct contact with the blood  
644 plasma that is essential for regulating  $\text{pH}_i$  via NHE activity. Combined, these observations may  
645 point towards an adrenergically-induced translocation of  $\beta$ -NHE protein from the cytoplasm into  
646 the membrane of white seabass RBCs. Intracellular translocation of NHEs in response to various  
647 stimuli has been reported in other systems, such as the gills of acid infused hagfish (70), insulin-  
648 treated rat cardiomyocytes (71), isolated mammalian cells after acidification (72) or the initiation  
649 of  $\text{Na}^+$ -glucose co-transport in intestinal epithelial cells (73). Studies on rainbow trout RBCs  
650 found that the abundance of radio-labelled  $\beta$ -NHE protein in the membrane increased after

651 hypoxic incubation (1.2 kPa for 30 mins, 74), which generally supports a mechanism of protein  
652 translocation. However, we incubated all RBCs in hypoxia and hypercapnia, and observed  $\beta$ -  
653 NHE translocation after adrenergic stimulation. Clearly, there are still many open questions  
654 regarding the well-studied  $\beta$ -NHE response of teleosts, and additional work is required to  
655 characterize the cellular mechanisms underlying the translocation of  $\beta$ -NHE protein and its  
656 regulation by catecholamines,  $PO_2$ ,  $PCO_2$  or pH. If substantiated, these findings may open new  
657 avenues in the research of RBC  $pH_i$  regulation in teleosts and perhaps other vertebrates.

658 The activation of RBC  $\beta$ -NHEs has been shown to raise  $pH_i$  above the equilibrium  
659 condition and plays an important role in protecting Hb- $O_2$  binding in teleosts (21). Previous work  
660 has characterized the resulting left-shift in the OEC (75–77) and the changes in arterial  $O_2$ -  
661 carrying capacity due to adrenergic stimulation of the RBCs (78–80). In the present study we  
662 quantified the protective effect of  $\beta$ -NHE activation on Hb- $O_2$  saturation in white seabass under  
663 environmentally relevant levels of hypercapnia and hypoxia. As expected, Hb- $O_2$  saturation  
664 decreased significantly, due to the Root effect, when  $PCO_2$  was increased from 0.3-3 kPa (Fig.  
665 5). Adrenergic stimulation of the RBCs with ISO significantly delayed the reduction in Hb- $O_2$   
666 saturation to higher  $EC_{50}PCO_2$  that were  $1.08 \pm 0.06$  kPa in ISO compared to  $0.85 \pm 0.06$  kPa in  
667 DMSO-treated blood (Fig. 6A). In ISO+Am-treated RBC, the  $EC_{50}PCO_2$  decreased significantly  
668 to  $0.91 \pm 0.06$  kPa, compared to ISO-treated cells, corroborating the involvement of the RBC  $\beta$ -NHE  
669 in the response. However, the  $EC_{50}PCO_2$  of ISO+Am-treated RBCs was still significantly higher  
670 compared to DMSO controls, perhaps indicating that 1 mM amiloride did not lead to a full  
671 inhibition of the  $\beta$ -NHE under the tested conditions, or that other, amiloride insensitive  
672 transporters, play a role in elevating RBC  $pH_i$  after adrenergic stimulation.

673 While  $\beta$ -NHE activity shifted the reduction in Hb- $O_2$  saturation to a higher  $PCO_2$ , the  
674 magnitude of the Root effect was not affected by adrenergic stimulation (Fig. 6B). No significant  
675 differences were observed in Max.  $\Delta$ Hb- $O_2$  sat. in any of the tested treatments and therefore, a  
676 severe acidosis generated by high  $PCO_2$  can overwhelm the physiological capacity of the  $\beta$ -NHE  
677 to protect RBC  $pH_i$ . The  $H^+$  extrusion by the  $\beta$ -NHE is secondarily active and driven by the  
678 trans-membrane  $Na^+$  gradient created by the RBC  $Na^+-K^+-ATPase$  (NKA). While both NKA  
679 activity (81) and the RBC rate of  $O_2$  consumption ( $\dot{M}O_2$ ) increase after adrenergic stimulation  
680 (82), it is possible that the capacity of the NKA to maintain the larger  $Na^+$  gradients required to  
681 compensate for a greater reduction in  $pH_i$  is limited, as could be the availability of ATP to fuel

682 the exchange. In addition,  $H^+$  that are extruded by the  $\beta$ -NHE will react with  $HCO_3^-$  in the  
683 plasma to form  $CO_2$  that can, once again, diffuse into the cells. This re-acidification of the cells  
684 via  $CO_2$  is part of the Jacobs-Stewart cycle and typically rate-limited by the formation of  $CO_2$  in  
685 the plasma of teleosts (83). However, as  $pH_e$  decreases, the pool of plasma  $H_2CO_3$  becomes  
686 larger (84), accelerating the Jacobs-Stewart cycle and the re-acidification of the cells, which may  
687 explain, in part, why  $\beta$ -NHE activity is ineffective at very high  $PCO_2$ .

688 The benefit of  $\beta$ -NHE activity on Hb- $O_2$  saturation was non-linear over the range of  
689  $PCO_2$  tested, and in normoxia the bell-shaped response had a maximum at  $\sim 1$  kPa  $PCO_2$  (Fig.  
690 7A). The observed relationship is likely dependent on the sigmoidal shape of the OEC, where a  
691 left-shift due to  $\beta$ -NHE activity has only marginal effects when Hb- $O_2$  saturation is high and the  
692 curve is flat (85). In addition,  $\beta$ -NHE activity in many teleosts is stimulated by high intracellular  
693  $[H^+]$  and inhibited by high extracellular  $[H^+]$  as  $pH_e$  decreases, yielding a bell-shaped  
694 relationship between  $\beta$ -NHE activity and pH (86). The ecological implications are noteworthy, as  
695 the protective effect of  $\beta$ -NHE activity on Hb- $O_2$  binding is greatest over the range of  $PCO_2$  that  
696 wild white seabass are currently experiencing during severe red-tide or upwelling events. The  
697 increase in Hb- $O_2$  saturation at these  $PCO_2$  is  $\sim 8\%$ , and the effect can be harnessed continuously  
698 with every pass of the RBCs through the gills. Everything else being equal, an increase in arterial  
699  $O_2$  content can sustain a proportionally higher  $\dot{M}O_2$ , increasing the scope for activity or reducing  
700 the requirements for anaerobic pathways of ATP production that can lead to a toxic accumulation  
701 of metabolic by-products, such as lactate and  $H^+$ . Thus, for fish that experience a potentially life-  
702 threatening surge in  $PCO_2$ , an 8% increase in arterial  $O_2$  content could make the difference  
703 between escaping into less-noxious waters or perishing in the attempt.

704 In the hypoxic trials, DMSO treated blood at arterial  $PCO_2$  (0.3 kPa) had a Hb- $O_2$   
705 saturation of  $55.0 \pm 3.3\%$ , which was close to the target value around Hb  $P_{50}$  (Fig. 5). As in  
706 normoxia, an increase in  $PCO_2$  caused a significant reduction in Hb- $O_2$  saturation, indicating the  
707 presence of a Root effect in hypoxia, which further decreased Hb- $O_2$  saturation, even below the  
708 level of the maximal normoxic Root effect. Consequently,  $H^+$  binding to Hb must occur over  
709 nearly the entire range of the OEC, which stands in contrast to previous findings in rainbow trout  
710 where the Bohr effect and  $H^+$  binding to Hb occurred largely in the upper half of the OEC (87,  
711 88). The possibility of inter-specific differences in the interaction between Hb- $O_2$  and  $H^+$  binding  
712 cannot be resolved from the present data. However, it seems more likely that the kinetics of  $H^+$

713 binding that induce the Bohr effect are different from those of the Root effect, which is  
714 supported by previous work indicating different molecular mechanisms for the two effects (89,  
715 90). The interacting kinetics of O<sub>2</sub> and H<sup>+</sup> binding to the Root effect Hbs of teleosts remain a  
716 worthwhile avenue for future research and studying a broader range of environmental and  
717 metabolic scenarios, in more species, may strengthen the important ecological implications of the  
718 present work.

719 As in normoxic blood, adrenergic activation of the β-NHE in hypoxia, increased Hb-O<sub>2</sub>  
720 saturation during a hypercapnic acidosis. This protective effect of the β-NHE was reflected in a  
721 significantly higher EC<sub>50</sub>PCO<sub>2</sub> in ISO- compared to DMSO or ISO+Am-treated RBCs (Fig. 6A).  
722 A significant main effect of O<sub>2</sub> on EC<sub>50</sub>PCO<sub>2</sub>, would indicate that in hypoxic blood a lower  
723 PCO<sub>2</sub> is required to desaturate Hb, compared to normoxic blood. However, this parameter  
724 estimate is influenced by the combined effects of PO<sub>2</sub> and PCO<sub>2</sub> on Hb-O<sub>2</sub> saturation (by taking  
725 into account the full scale from 0-100%), which is not easily untangled statistically. Importantly,  
726 there was no drug×O<sub>2</sub> interaction, indicating that the effect of the drugs was similar under  
727 normoxia and hypoxia, highlighting the benefit of β-NHE activation under both conditions.

728 In hypoxia, the benefit of β-NHE activation on Hb-O<sub>2</sub> saturation was also non-linear over  
729 the tested range of PCO<sub>2</sub> (Fig. 7B). β-NHE activation in hypoxic blood caused the largest  
730 increase in Hb-O<sub>2</sub> saturation at arterial PCO<sub>2</sub> (0.3 kPa) and the benefits decreased markedly  
731 towards higher levels of hypercapnia; likely due to the flattening of the OEC at low Hb-O<sub>2</sub>  
732 saturations and perhaps some inhibition of the transporter by the increasing extracellular [H<sup>+</sup>].  
733 The effect of β-NHE activity on Hb-O<sub>2</sub> binding was larger in hypoxia compared to normoxia,  
734 and at 0.3 kPa PCO<sub>2</sub> Hb-O<sub>2</sub> saturation increased by 11±0.4%. This effect is even greater when  
735 considering that the available O<sub>2</sub>-carrying capacity is lower in hypoxia and when expressed  
736 relative to the available Hb-O<sub>2</sub> saturation (55% in DMSO treated blood), the relative benefit of β-  
737 NHE activity was 19.2±0.0%. Many teleost β-NHEs are O<sub>2</sub>-sensitive (91) and the larger effects  
738 of β-NHE activity on Hb-O<sub>2</sub> saturation in hypoxia may be related to a partial inhibition of the  
739 transporter in normoxia; whereas, the effect appears to be less severe in white seabass compared  
740 to other species (30, 66, 92). The nearly 20% increase in Hb-O<sub>2</sub> saturation due to β-NHE activity  
741 is of great ecological significance and could be a principal pathway to safeguard arterial O<sub>2</sub>  
742 transport and facilitate hypoxic survival of white seabass in the wild. However, the present data  
743 also indicate a diminishing benefit of the β-NHE response when PCO<sub>2</sub> increases; thus, revealing

744 a potential vulnerability of white seabass to the combined stressors of hypoxia and hypercapnia;  
745 surviving these conditions likely requires additional behavioral and metabolic adjustments, that  
746 are yet to be determined.

747 **Conclusion**

748         The present results provide a thorough characterization of the Hb-O<sub>2</sub> binding system of  
749 white seabass, a non-model marine teleost with great ecological and economic importance in  
750 Southern California. Several lines of evidence confirmed the presence of a RBC  $\beta$ -NHE and  
751 super-resolution microscopy may point towards a regulation of the transporter's activity via  
752 intracellular translocation, a potentially novel pathway that deserves a more thorough  
753 investigation. In white seabass, the activity of the RBC  $\beta$ -NHE may provide significant  
754 protection of Hb-O<sub>2</sub> binding during hypercapnic conditions with maximal benefits around the  
755 ecologically relevant level of  $\sim 1$  kPa PCO<sub>2</sub>. Large benefits of  $\beta$ -NHE activation were also  
756 observed in hypoxia, however, with a greater sensitivity to increases in PCO<sub>2</sub>. Combined, these  
757 data indicate that RBC function plays a critical role in modulating the O<sub>2</sub>-binding characteristics  
758 of the pH-sensitive Hbs in white seabass and is likely part of the suite of physiological responses  
759 that determines their hypoxia and hypercapnia tolerance. Finally, these results also highlight a  
760 potential vulnerability of white seabass to combinations of these stressors and further research is  
761 needed to study the implications for wild fish conservation along the steadily warming and  
762 eutrophicated California coast and in high density aquaculture.

763 **Acknowledgements**

764           Thanks are due to Mark Drawbridge and the Hubbs SeaWorld Research Institute  
765 (HSWRI) for generously providing the white seabass and Phil Zerofski, Jessica Hallisey,  
766 Garfield Kwan and Daniel Jio for their help with animal care.



767 **Grants**

768 TSH was supported, and the study was funded by a National Science Foundation (NSF)  
769 grant to MT (award no. 1754994), and AMC was supported by a SIO Postdoctoral Scholar  
770 Fellowship.

771 **Disclosures**

772           The authors declare no competing interests.

773 **Endnotes**

774 The supplemental materials are available through figshare

775 ([doi.org/10.6084/m9.figshare.14934405.v1](https://doi.org/10.6084/m9.figshare.14934405.v1)) as well as all raw data and R source code

776 ([doi.org/10.6084/m9.figshare.14944293.v1](https://doi.org/10.6084/m9.figshare.14944293.v1)), and sequence data is available through NCBI (see

777 detailed accession numbers in manuscript and supplement Table S1).

778 **References**

- 779 1. **Frieder CA, Nam SH, Martz TR, Levin LA.** High temporal and spatial variability of  
780 dissolved oxygen and pH in a nearshore California kelp forest. *Biogeosciences* 9: 3917–  
781 3930, 2012. doi: 10.5194/bg-9-3917-2012.
- 782 2. **Van Dolah, F M.** Marine algal toxins: origins, health effects, and their increased  
783 occurrence. *Environ Health Perspect* 108: 133–141, 2000. doi: 10.1289/ehp.00108s1133.
- 784 3. **Diaz RJ, Rosenberg R.** Spreading Dead Zones and Consequences for Marine Ecosystems.  
785 *Science* 321: 926–929, 2008. doi: 10.1126/science.1156401.
- 786 4. **Harley CDG, Hughes AR, Hultgren KM, Miner BG, Sorte CJB, Thornber CS,**  
787 **Rodriguez LF, Tomanek L, Williams SL.** The impacts of climate change in coastal  
788 marine systems. *Ecol Lett* 9: 228–241, 2006. doi: [https://doi.org/10.1111/j.1461-](https://doi.org/10.1111/j.1461-0248.2005.00871.x)  
789 [0248.2005.00871.x](https://doi.org/10.1111/j.1461-0248.2005.00871.x).
- 790 5. **Clemens S, Smith JE.** *SOAR Monitoring Report*. 2020.
- 791 6. **Boutilier RG, Heming TA, Iwama GK.** Physicochemical parameters for use in fish  
792 respiratory physiology. In: *Fish Physiology*, edited by Hoar W. S., Randall DJ. New York:  
793 Academic Press, 1984, p. 403–426.
- 794 7. **Lewis E, Wallace DWR.** *Program Developed for CO<sub>2</sub> System Calculations*. Oak Ridge  
795 Natl. Lab., Oak Ridge, Tenn.: ORNL/CDIAC-105, Carbon Dioxide Inf. Anal. Cent., 1998.
- 796 8. **Vaquer-Sunyer R, Duarte CM.** Thresholds of hypoxia for marine biodiversity. *PNAS* 105:  
797 15452–15457, 2008. doi: 10.1073/pnas.0803833105.
- 798 9. **Hughes GM.** Respiratory responses to hypoxia in fish. *Am Zool* 13: 475–489, 1973.
- 799 10. **Jensen FB, Weber RE.** Respiratory properties of tench blood and hemoglobin. Adaptation  
800 to hypoxic-hypercapnic water. *Mol Physiol* 2: 235–250, 1982.
- 801 11. **Mandic M, Todgham AE, Richards JG.** Mechanisms and evolution of hypoxia tolerance  
802 in fish. *Proc R Soc Lond, Ser B: Biol Sci* 276: 735–744, 2009.
- 803 12. **Bohr C, Hasselbalch K, Krogh A.** About a new biological relation of high importance that  
804 the blood carbonic acid tension exercises on its oxygen binding. *Skand Arch Physiol* 16:  
805 402–412, 1904.
- 806 13. **Root RW.** The respiratory function of the blood of marine fishes. *Biol Bull* 61: 427–456,  
807 1931. doi: 10.2307/1536959.
- 808 14. **Scholander PF, Van Dam L.** Secretion of gases against high pressures in the swimbladder  
809 of deep sea fishes. I. Oxygen dissociation in blood. *Biol Bull* 107: 247–259, 1954. doi:  
810 [10.2307/1538611](https://doi.org/10.2307/1538611).

- 811 15. **Damsgaard C, Lauridsen H, Harter TS, Kwan GT, Thomsen JS, Funder AM,**  
812 **Supuran CT, Tresguerres M, Matthews PG, Brauner CJ.** A novel acidification  
813 mechanism for greatly enhanced oxygen supply to the fish retina. *eLife* 9: e58995, 2020.  
814 doi: 10.7554/eLife.58995.
- 815 16. **Pelster B.** Buoyancy at depth. In: *Fish Physiology*, edited by Randall D, Farrell A. New  
816 York: Academic Press, 1997, p. 195–238.
- 817 17. **Wittenberg JB, Wittenberg BA.** Active secretion of oxygen into the eye of fish. *Nature*  
818 194: 106–107, 1962. doi: 10.1038/194106a0.
- 819 18. **Randall DJ, Perry SF.** Catecholamines. In: *Fish Physiology*, edited by Hoar WS, Randall  
820 DJ, Farrell AP. New York: Academic Press, 1992, p. 255–300.
- 821 19. **Tetens V, Lykkeboe G.** Potency of adrenaline and noradrenaline for b-adrenergic proton  
822 extrusion from red cells of rainbow trout, *Salmo gairdneri*. *J Exp Biol* 134: 267–280, 1988.
- 823 20. **Mahe Y, Garciaromeu F, Motais R.** Inhibition by amiloride of both adenylate-cyclase  
824 activity and the Na<sup>+</sup>/H<sup>+</sup> antiporter in fish erythrocytes. *Eur J Pharmacol* 116: 199–206,  
825 1985. doi: 10.1016/0014-2999(85)90154-2.
- 826 21. **Nikinmaa M.** Membrane transport and control of hemoglobin-oxygen affinity in nucleated  
827 erythrocytes. *Physiol Rev* 72: 301–21, 1992.
- 828 22. **Rummer JL, Roshan-Moniri M, Balfry SK, Brauner CJ.** Use it or lose it? Sablefish,  
829 *Anoplopoma fimbria*, a species representing a fifth teleostean group where the βNHE  
830 associated with the red blood cell adrenergic stress response has been secondarily lost. *J*  
831 *Exp Biol* 213: 1503–1512, 2010. doi: 10.1242/jeb.038844.
- 832 23. **Shu JJ, Harter TS, Morrison PR, Brauner CJ.** Enhanced hemoglobin-oxygen unloading  
833 in migratory salmonids. *J Comp Physiol B* 7: 1–11, 2017. doi: 10.1007/s00360-017-1139-9.
- 834 24. **Berenbrink M, Koldkjaer P, Kepp O, Cossins AR.** Evolution of oxygen secretion in  
835 fishes and the emergence of a complex physiological system. *Science* 307: 1752–1757,  
836 2005. doi: 10.1126/science.1107793.
- 837 25. **Montgomery DW, Simpson SD, Engelhard GH, Birchenough SNR, Wilson RW.** Rising  
838 CO<sub>2</sub> enhances hypoxia tolerance in a marine fish. *Sci Rep* 9: 15152, 2019. doi:  
839 10.1038/s41598-019-51572-4.
- 840 26. **Caldwell S, Rummer JL, Brauner CJ.** Blood sampling techniques and storage duration:  
841 Effects on the presence and magnitude of the red blood cell beta-adrenergic response in  
842 rainbow trout (*Oncorhynchus mykiss*). *Comp Biochem Physiol, A: Mol Integr Physiol* 144:  
843 188–195, 2006. doi: 10.1016/j.cbpa.2006.02.029.
- 844 27. **Brauner CJ, Thorarensen H, Gallagher P, Farrell AP, Randall DJ.** CO<sub>2</sub> transport and  
845 excretion in rainbow trout (*Oncorhynchus mykiss*) during graded sustained exercise. *Resp*  
846 *Physiol* 119: 69–82, 2000.

- 847 28. **van Kampen EJ, Zijlstra WG.** Spectrophotometry of Hemoglobin and Hemoglobin  
848 Derivatives. In: *Advances in Clinical Chemistry*, edited by Latner AL, Schwartz MK.  
849 Elsevier, p. 199–257.
- 850 29. **Zeidler R, Kim HD.** Preferential hemolysis of postnatal calf red cells induced by internal  
851 alkalization. *J Gen Physiol* 70: 385–401, 1977. doi: 10.1085/jgp.70.3.385.
- 852 30. **Motais R, Garcia-Romeu F, Borgese F.** The control of Na<sup>+</sup>/H<sup>+</sup> exchange by molecular  
853 oxygen in trout erythrocytes. A possible role of hemoglobin as a transducer. *J gen Physiol*  
854 90: 197–207, 1987. doi: 10.1085/jgp.90.2.197.
- 855 31. **Salama A, Nikinmaa M.** Species differences in the adrenergic responses of fish red cells:  
856 studies on whitefish, pikeperch, trout and carp. *Fish Physiol Biochem* 6: 167–173, 1989.
- 857 32. **Borgese F, Sardet C, Cappadoro M, Pouyssegur J, Motais R.** Cloning and expression of  
858 a cAMP-activated Na<sup>+</sup>/H<sup>+</sup> exchanger: evidence that the cytoplasmic domain mediates  
859 hormonal regulation. *PNAS* 89: 6765–9, 1992.
- 860 33. **Clifford AM, Weinrauch AM, Edwards SL, Wilkie MP, Goss GG.** Flexible ammonia  
861 handling strategies using both cutaneous and branchial epithelia in the highly ammonia-  
862 tolerant Pacific hagfish. *Am J Physiol Regul, Integr Comp Physiol* 313: R78–R90, 2017.  
863 doi: 10.1152/ajpregu.00351.2016.
- 864 34. **Chen S, Zhou Y, Chen Y, Gu J.** fastp: an ultra-fast all-in-one FASTQ preprocessor.  
865 *Bioinformatics* 34: i884–i890, 2018. doi: 10.1093/bioinformatics/bty560.
- 866 35. **Grabherr MG, Haas BJ, Yassour M, Levin JZ, Thompson DA, Amit I, Adiconis X,  
867 Fan L, Raychowdhury R, Zeng Q, Chen Z, Mauceli E, Hacohen N, Gnirke A, Rhind  
868 N, di Palma F, Birren BW, Nusbaum C, Lindblad-Toh K, Friedman N, Regev A.** Full-  
869 length transcriptome assembly from RNA-Seq data without a reference genome. *Nat*  
870 *Biotechnol* 29: 644–652, 2011. doi: 10.1038/nbt.1883.
- 871 36. **Bushnell B.** BBMap: A Fast, Accurate, Splice-Aware Aligner [Online]. Lawrence Berkeley  
872 National Lab. (LBNL), Berkeley, CA (United States). <https://www.osti.gov/biblio/1241166>  
873 [30 Mar. 2021].
- 874 37. **Edgar RC.** MUSCLE: multiple sequence alignment with high accuracy and high  
875 throughput. *Nucleic Acids Res* 32: 1792–1797, 2004. doi: 10.1093/nar/gkh340.
- 876 38. **Galtier N, Gouy M, Gautier C.** SEAVIEW and PHYLO\_WIN: two graphic tools for  
877 sequence alignment and molecular phylogeny. *Bioinformatics* 12: 543–548, 1996. doi:  
878 10.1093/bioinformatics/12.6.543.
- 879 39. **Gouy M, Guindon S, Gascuel O.** SeaView Version 4: A Multiplatform Graphical User  
880 Interface for Sequence Alignment and Phylogenetic Tree Building. *Mol Biol Evol* 27: 221–  
881 224, 2010. doi: 10.1093/molbev/msp259.

- 882 40. **Castresana J.** Selection of Conserved Blocks from Multiple Alignments for Their Use in  
883 Phylogenetic Analysis. *Mol Biol Evol* 17: 540–552, 2000. doi:  
884 10.1093/oxfordjournals.molbev.a026334.
- 885 41. **Talavera G, Castresana J.** Improvement of Phylogenies after Removing Divergent and  
886 Ambiguously Aligned Blocks from Protein Sequence Alignments. *Systematic Biology* 56:  
887 564–577, 2007. doi: 10.1080/10635150701472164.
- 888 42. **Miller MA, Pfeiffer W, Schwartz T.** Creating the CIPRES Science Gateway for Inference  
889 of Large Phylogenetic Trees. Gateway Computing Environments Workshop (GCE). New  
890 Orleans, LA: 2010, p. 1–8.
- 891 43. **Stamatakis A.** RAxML version 8: a tool for phylogenetic analysis and post-analysis of  
892 large phylogenies. *Bioinformatics* 30: 1312–1313, 2014. doi:  
893 10.1093/bioinformatics/btu033.
- 894 44. **Le SQ, Gascuel O.** An Improved General Amino Acid Replacement Matrix. *Mol Biol Evol*  
895 25: 1307–1320, 2008. doi: 10.1093/molbev/msn067.
- 896 45. **Kozak M.** An analysis of 5'-noncoding sequences from 699 vertebrate messenger RNAs.  
897 *Nucleic Acids Res* 15: 8125–8148, 1987. doi: 10.1093/nar/15.20.8125.
- 898 46. **Nishikawa T, Ota T, Isogai T.** Prediction whether a human cDNA sequence contains  
899 initiation codon by combining statistical information and similarity with protein sequences.  
900 *Bioinformatics* 16: 960–967, 2000. doi: 10.1093/bioinformatics/16.11.960.
- 901 47. **RCoreTeam.** R: A language and environment for statistical computing [Online]. R  
902 Foundation for Statistical Computing. <https://www.R-project.org/>.
- 903 48. **RStudioTeam.** RStudio: Integrated Development Environment for R [Online]. RStudio,  
904 Inc. <http://www.rstudio.com/>.
- 905 49. **Wickham H.** *ggplot2: Elegant Graphics for Data Analysis*. New York: Springer-Verlag,  
906 2009.
- 907 50. **Wood CM, McDonald DG, McMahon BR.** The influence of experimental anemia on  
908 blood acid-base regulation *in vivo* and *in vitro* in the starry flounder (*Platichthys stellatus*)  
909 and the rainbow trout (*Salmo gairdneri*). *J Exp Biol* 96: 221–237, 1982.
- 910 51. **Dunn C, O'Dowd A, Randall RE.** Fine mapping of the binding sites of monoclonal  
911 antibodies raised against the Pk tag. *J Immunol Methods* 224: 141–150, 1999. doi:  
912 10.1016/s0022-1759(99)00017-4.
- 913 52. **Mairbäurl H.** Red blood cell function in hypoxia at altitude and exercise. *Int J Sports Med*  
914 15: 51–63, 1994.
- 915 53. **Tenney SM.** Hypoxia and the Brain: Functional significance of differences in mammalian  
916 hemoglobin affinity for oxygen. In: *Proceeding of the 9th International Hypoxia*



- 917 *Symposium*, edited by Sutton, J. R, Houston C. S., Coates G. Lake Louise, Canada: Queen  
918 city printers, Burlington, Vt., 1995, p. 57–68.
- 919 54. **Brauner CJ, Wang T, Val AL, Jensen FB.** Non-linear release of Bohr protons with  
920 haemoglobin-oxygenation in the blood of two teleost fishes; carp (*Cyprinus carpio*) and  
921 tambaqui (*Colossoma macropomum*). *Fish Physiol Biochem* 24: 97–104, 2001.
- 922 55. **Rummer JL, Brauner CJ.** Root effect haemoglobins in fish may greatly enhance general  
923 oxygen delivery relative to other vertebrates. *PLoS one* 10: e0139477, 2015. doi:  
924 10.1371/journal.pone.0139477.
- 925 56. **Brauner CJ, Wang T.** The optimal oxygen equilibrium curve: a comparison between  
926 environmental hypoxia and anemia. *Am Zool* 37: 101–108, 1997.
- 927 57. **Mairbäurl H, Weber RE.** Oxygen transport by hemoglobin. *Compr Physiol* 2: 1463–1489,  
928 2012.
- 929 58. **Berenbrink M, Koldkjaer P, Wright EH, Kepp O, da Silva AJ.** Magnitude of the Root  
930 effect in red blood cells and haemoglobin solutions of fishes: a tribute to August Krogh.  
931 *Acta Physiol* 202: 583–592, 2011. doi: 10.1111/j.1748-1716.2010.02243.x.
- 932 59. **Pelster B, Randall DJ.** Physiology of the Root effect. In: *Fish Physiology*, edited by Perry  
933 SF, Tufts BL. New York: Academic Press, 1998, p. 113–140.
- 934 60. **Berenbrink M.** Historical reconstructions of evolving physiological complexity: O<sub>2</sub>  
935 secretion in the eye and swimbladder of fishes. *J Exp Biol* 210: 1641–1652, 2007. doi:  
936 10.1242/jeb.003319.
- 937 61. **Landau M, Herz K, Padan E, Ben-Tal N.** Model structure of the Na<sup>+</sup>/H<sup>+</sup> exchanger 1  
938 (NHE1): functional and clinical implications. *J Biol Chem* 282: 37854–37863, 2007. doi:  
939 10.1074/jbc.M705460200.
- 940 62. **Lee BLLL, Sykes BDS, Fliegel LF.** Structural analysis of the Na<sup>+</sup>/H<sup>+</sup> exchanger isoform  
941 1 (NHE1) using the divide and conquer approach. *Biochem Cell Biol*, 2011. doi:  
942 10.1139/O10-140.
- 943 63. **Chen XL, Zhang B, Chng YR, Ong JLY, Chew SF, Wong WP, Lam SH, Ip YK.**  
944 Na<sup>+</sup>/H<sup>+</sup> Exchanger 3 Is Expressed in Two Distinct Types of Ionocyte, and Probably  
945 Augments Ammonia Excretion in One of Them, in the Gills of the Climbing Perch Exposed  
946 to Seawater. *Front Physiol* 8, 2017. doi: 10.3389/fphys.2017.00880.
- 947 64. **Blair S, Li X, Dutta D, Chamot D, Fliegel L, Goss G.** Rainbow Trout (*Oncorhynchus*  
948 *mykiss*) Na<sup>+</sup>/H<sup>+</sup> Exchangers tNhe3a and tNhe3b Display Unique Inhibitory Profiles  
949 Dissimilar from Mammalian NHE Isoforms. *Int J Mol Sci* 22: 2205, 2021. doi:  
950 10.3390/ijms22042205.

- 951 65. **Nikinmaa M, Huestis WH.** Adrenergic swelling of nucleated erythrocytes - cellular  
952 mechanisms in a bird, domestic goose, and 2 teleosts, striped bass and rainbow trout. *J Exp*  
953 *Biol* 113: 215–224, 1984.
- 954 66. **Weaver YR, Kiessling K, Cossins AR.** Responses of the Na<sup>+</sup>/H<sup>+</sup> exchanger of European  
955 flounder red blood cells to hypertonic, beta-adrenergic and acidotic stimuli. *J Exp Biol* 202:  
956 21–32, 1999.
- 957 67. **Joseph-Silverstein J, Cohen WD.** The cytoskeletal system of nucleated erythrocytes. III.  
958 Marginal band function in mature cells. *J Cell Biol* 98: 2118–2125, 1984.
- 959 68. **Dmitrieff S, Alsina A, Mathur A, Nédélec FJ.** Balance of microtubule stiffness and  
960 cortical tension determines the size of blood cells with marginal band across species. .
- 961 69. **Pedersen SF, King SA, Rigor RR, Zhuang Z, Warren JM, Cala PM.** Molecular cloning  
962 of NHE1 from winter flounder RBCs: activation by osmotic shrinkage, cAMP, and  
963 calyculin A. *Am J Physiol Cell Physiol* 284: C1561–C1576, 2003.
- 964 70. **Parks SK, Tresguerres M, Goss GG.** Blood and gill responses to HCl infusions in the  
965 Pacific hagfish (*Eptatretus stoutii*). *Can J Zool* 85: 855–862, 2007.
- 966 71. **Lawrence SP, Holman GD, Koumanov F.** Translocation of the Na<sup>+</sup>/H<sup>+</sup> exchanger 1  
967 (NHE1) in cardiomyocyte responses to insulin and energy-status signalling. *Biochem J* 432:  
968 515–523, 2010. doi: 10.1042/BJ20100717.
- 969 72. **Gens JS, Du H, Tackett L, Kong S-S, Chu S, Montrose MH.** Different ionic conditions  
970 prompt NHE2 and NHE3 translocation to the plasma membrane. *Biochim Biophys Acta,*  
971 *Biomembr* 1768: 1023–1035, 2007. doi: 10.1016/j.bbamem.2007.01.003.
- 972 73. **Zhao H, Shiue H, Palkon S, Wang Y, Cullinan P, Burkhardt JK, Musch MW, Chang**  
973 **EB, Turner JR.** Ezrin regulates NHE3 translocation and activation after Na<sup>+</sup>-glucose  
974 cotransport. *PNAS* 101: 9485–9490, 2004. doi: 10.1073/pnas.0308400101.
- 975 74. **Reid SD, Perry SF.** Quantification of presumptive Na<sup>+</sup>/H<sup>+</sup> antiporters of the erythrocytes  
976 of trout and eel. *Fish Physiol Biochem* 12: 455–463, 1994.
- 977 75. **Jensen BJ, Nikinmaa M, Weber RE.** Effects of exercise stress on acid-base balance and  
978 respiratory function in blood of the teleost *Tinca tinca*. *Resp Physiol* 51: 291–301, 1983.
- 979 76. **Nikinmaa M.** Adrenergic regulation of hemoglobin oxygen-affinity in rainbow trout red  
980 cells. *J Comp Physiol* 152: 67–72, 1983.
- 981 77. **Nikinmaa M, Soivio A.** Oxygen dissociation curves and oxygen capacities of blood of a  
982 freshwater fish, *Salmo gairdneri*. *Ann Zool Fenn* 16: 217–221, 1979.
- 983 78. **Cossins AR, Richardson PA.** Adrenaline-induced Na<sup>+</sup>/H<sup>+</sup> exchange in trout erythrocytes  
984 and its effects upon oxygen carrying capacity. *J Exp Biol* 118: 229–246, 1985.

- 985 79. **Ferguson RA, Tufts BL, Boutilier RG.** Energy metabolism in trout red cells:  
986 consequences of adrenergic stimulation *in vivo* and *in vitro*. *J Exp Biol* 143: 133–147, 1989.
- 987 80. **Nikinmaa M, Cech JJ, McEnroe M.** Blood oxygen transport in stressed striped bass  
988 (*Morone saxatilis*): role of  $\beta$ -adrenergic responses. *J Comp Physiol* 154: 365–369, 1984.
- 989 81. **Bourne PK, Cossins AR.** On the instability of  $K^+$  influx in erythrocytes of the rainbow  
990 trout, *Salmo gairdneri*, and the role of catecholamine hormones in maintaining *in vivo*  
991 influx activity. *J Exp Biol* 101: 93–104, 1982.
- 992 82. **Boutilier RG, Ferguson RA.** Nucleated red cell function: metabolism and pH regulation.  
993 *Can J Zool* 67: 2986–2993, 1989.
- 994 83. **Jacobs MH, Stewart DR.** The role of carbonic anhydrase in certain ionic exchanges  
995 involving the erythrocyte. *J gen Physiol* 25: 539–552, 1942.
- 996 84. **Motais R, Fievet B, Garcia-Romeu F, Thomas S.**  $Na^+ - H^+$  exchange and pH regulation in  
997 red blood cells: role of uncatalyzed  $H_2CO_3^-$  dehydration. *Am J Physiol* 256: C728–C735,  
998 1989.
- 999 85. **Kobayashi M, Ishigaki K, Kobayashi M, Imai K.** Shape of the haemoglobin-oxygen  
1000 equilibrium curve and oxygen transport efficiency. *Resp Physiol* 95: 321–328, 1994.
- 1001 86. **Borgese F, Garcia-Romeu F, Motais R.** Ion movements and volume changes induced by  
1002 catecholamines in erythrocytes of rainbow trout: effect of pH. *J Physiol* 382: 145–157,  
1003 1987.
- 1004 87. **Brauner CJ, Gilmour KM, Perry SF.** Effect of haemoglobin oxygenation on Bohr proton  
1005 release and  $CO_2$  excretion in the rainbow trout. *Resp Physiol* 106: 65–70, 1996.
- 1006 88. **Brauner CJ, Thorarensen H, Gallagher P, Farrell AP, Randall DJ.** The interaction  
1007 between  $O_2$  and  $CO_2$  exchange in rainbow trout during graded sustained exercise. *Resp*  
1008 *Physiol* 119: 83–96, 2000.
- 1009 89. **Brittain T.** The Root effect. *Comp Biochem Physiol* 86B: 473–481, 1987.
- 1010 90. **Perutz MF, Brunori M.** Stereochemistry of cooperative effects in fish and amphibian  
1011 haemoglobins. *Nature* 299: 421–426, 1982.
- 1012 91. **Gibson J, Cossins A, Ellory J.** Oxygen-sensitive membrane transporters in vertebrate red  
1013 cells. *J Exp Biol* 203: 1395–1407, 2000.
- 1014 92. **Salama A, Nikinmaa M.** The adrenergic responses of carp (*Cyprinus carpio*) red cells:  
1015 effects of  $PO_2$  and pH. *J Exp Biol* 136: 405–416, 1988.
- 1016

1017 **Figure legends**

1018 **Figure 1 Oxygen binding characteristics of white seabass whole blood.** Oxygen equilibrium  
1019 curves showing hemoglobin-oxygen saturation (Hb-O<sub>2</sub> sat.; %) as a function of the partial  
1020 pressure of oxygen (PO<sub>2</sub>; kPa) at five partial pressures of carbon dioxide (PCO<sub>2</sub>). The PO<sub>2</sub> that  
1021 yields 50% Hb-O<sub>2</sub> saturation (P<sub>50</sub>) and the cooperativity coefficient of Hb-O<sub>2</sub> binding (Hill  
1022 coefficient, n<sub>H</sub>) are shown for each curve. The main effects of PCO<sub>2</sub> on P<sub>50</sub> and n<sub>H</sub> were analyzed  
1023 with ACOVA ( $P < 0.05$ ,  $N = 8$ ). The Bohr coefficients (B) relative to extracellular (pH<sub>e</sub>) and  
1024 intracellular (pH<sub>i</sub>), the relationship between pH<sub>e</sub> and pH<sub>i</sub> and the non-bicarbonate buffer capacity  
1025 of the blood (at 5% Hct) were determined by linear regressions (see Fig. S2). The Root effect (R)  
1026 was determined at 21 kPa PO<sub>2</sub> from the model parameters shown for the DMSO treatment in Fig.  
1027 6B. All data are means±s.e.m.

1028

1029 **Figure 2 Changes in blood parameters after adrenergic stimulation of white seabass whole**  
1030 **blood.** A) Hematocrit (%), B) mean cell hemoglobin content (MCHC; mM hemoglobin l<sup>-1</sup> red  
1031 blood cells), C) extracellular pH (pH<sub>e</sub>) and D) intracellular pH (pH<sub>i</sub>). Blood was equilibrated in  
1032 tonometers at 3 kPa PO<sub>2</sub> and 1 kPa PCO<sub>2</sub> and treated with either: i) a carrier control (DMSO;  
1033 0.25%), ii) the β-adrenergic agonist isoproterenol (ISO; 10 μM), or iii) ISO plus amiloride  
1034 (ISO+Am; 1 mM), an inhibitor of sodium-proton exchangers (NHE). The dotted line indicates  
1035 initial values for each parameter and changes were recorded over 60 min. The main effects of  
1036 drug, time, and their interaction term (drug×time) were analyzed with a two-way ANOVA ( $P <$   
1037  $0.05$ ,  $N = 6$  and  $N = 5$  for ISO+Am). There were no significant changes in hemoglobin  
1038 concentration ([Hb]; mM) throughout the trials. Multiple comparisons were with paired t-tests  
1039 with a Benjamini-Hochberg correction and superscript letters that differ indicate significant  
1040 differences between treatments at 60 min. Individual datapoints and means±s.e.m. Inserts E-H)  
1041 differential interference contrast (DIC, 60x) images of red blood cells fixed at the beginning (ini)  
1042 and the end of the trial (T60). Cell swelling was visually confirmed in ISO-treated cells, but not  
1043 in other treatments, and mostly along the z-axis of the cells (arrows), while the x-y-axis seemed  
1044 largely unaffected.

1045

1046 **Figure 3: Phylogenetic analysis of nine NHE-like protein sequences in the *de novo* assembly**  
1047 **of a combined white seabass gill and red blood cell transcriptome.** Novel white seabass  
1048 sequences are highlighted in blue and the β-NHE in red (Slc9a1b). Shadings delineate sub-  
1049 families of the Slc9a1 gene family. The tree was rooted against the NHE2 from *Caenorhabditis*  
1050 *elegans* in orange. Accession numbers for all species are those reported in Table S1.  
1051

1052 **Figure 4 Immunocytochemical localization of the β-adrenergic sodium proton exchanger**  
1053 **(β-NHE) in white seabass red blood cells.** Blood was equilibrated in tonometers at 3 kPa PO<sub>2</sub>  
1054 and 1 kPa PCO<sub>2</sub> for 60 mins (see Fig. 2 for details) in the presence of either: A-D) a carrier  
1055 control (DMSO; 0.25%), or E-H) the β-adrenergic agonist isoproterenol (ISO; 10 μM). Fixed  
1056 cells were immuno-stained with a monoclonal α-tubulin antibody to visualize the marginal band  
1057 (red), with DAPI to visualize the cell nuclei (A and E), and with a polyclonal anti-β-NHE

1058 antibody (green, B and F). D and H) Magnified view of the insets in the merged images, where  
1059 arrows indicate weak or absent  $\beta$ -NHE immunoreactivity on the membrane of Ctrl cells and  
1060 intense staining in ISO-treated cells. These responses were representative and repeatable ( $N = 4$ )  
1061 and images showing a larger number of cells are available in the supplement (Fig. S5).

1062

1063 **Figure 5 Hemoglobin-oxygen saturation (Hb-O<sub>2</sub> sat.; %) during hypercapnic acidification**  
1064 **of white seabass whole blood.** Hematocrit was set to 5%, blood was equilibrated in tonometers  
1065 at 21 kPa PO<sub>2</sub> and 0.3 kPa PCO<sub>2</sub> and treated with either: i) a carrier control (DMSO; 0.25%), ii)  
1066 the  $\beta$ -adrenergic agonist isoproterenol (ISO; 10  $\mu$ M), or iii) ISO plus amiloride (ISO+Am; 1  
1067 mM), an inhibitor of sodium-proton exchangers (NHE). For each sample, runs were performed in  
1068 normoxia (21 kPa PO<sub>2</sub>; solid symbols) or hypoxia (3 kPa PO<sub>2</sub>; open symbols). Individual  
1069 datapoints and means $\pm$ s.e.m. ( $N = 6$ ).

1070

1071 **Figure 6 Parameter estimates describing the changes in hemoglobin-oxygen saturation**  
1072 **during hypercapnic acidification of white seabass whole blood.** A) The PCO<sub>2</sub> that elicits a  
1073 half-maximal reduction in Hb-O<sub>2</sub> saturation (EC<sub>50</sub>PCO<sub>2</sub>; kPa). and B) the maximal reduction in  
1074 Hb-O<sub>2</sub> saturation due to acidification (Max.  $\Delta$ Hb-O<sub>2</sub> sat.; %). Treatments were: i) a carrier  
1075 control (DMSO; 0.25%), ii) the  $\beta$ -adrenergic agonist isoproterenol (ISO; 10  $\mu$ M), or iii) ISO plus  
1076 amiloride (ISO+Am; 1 mM) an inhibitor of sodium-proton exchangers (NHE). For each sample,  
1077 runs were performed in normoxia (21 kPa PO<sub>2</sub>; solid symbols) or hypoxia (3 kPa PO<sub>2</sub>; open  
1078 symbols). The main effects of drug treatments (drug), oxygen (O<sub>2</sub>) and their interaction term  
1079 (drug $\times$ O<sub>2</sub>) were analyzed with a two-way ANOVA ( $P < 0.05$ ,  $N = 6$ ). Multiple comparisons were  
1080 with paired t-tests and a Benjamini-Hochberg correction and superscript letters that differ  
1081 indicate significant differences between treatments for each O<sub>2</sub> tension. Individual datapoints and  
1082 means $\pm$ s.e.m. ( $N = 6$ ).

1083

1084 **Figure 7 Relative changes in hemoglobin-oxygen saturation ( $\Delta$ Hb-O<sub>2</sub> sat.; %) during**  
1085 **hypercapnic acidification of white seabass whole blood.** A) in normoxia (21 kPa PO<sub>2</sub>; solid  
1086 symbols) or B) hypoxia (3 kPa PO<sub>2</sub>; open symbols). Treatments were: i) a carrier control  
1087 (DMSO; 0.25%), ii) the  $\beta$ -adrenergic agonist isoproterenol (ISO; 10  $\mu$ M), or iii) ISO plus  
1088 amiloride (ISO+Am; 1 mM), an inhibitor of sodium-proton exchangers (NHE). Individual  
1089 datapoints, means $\pm$ s.e.m. and 95% confidence intervals ( $N = 6$ ).

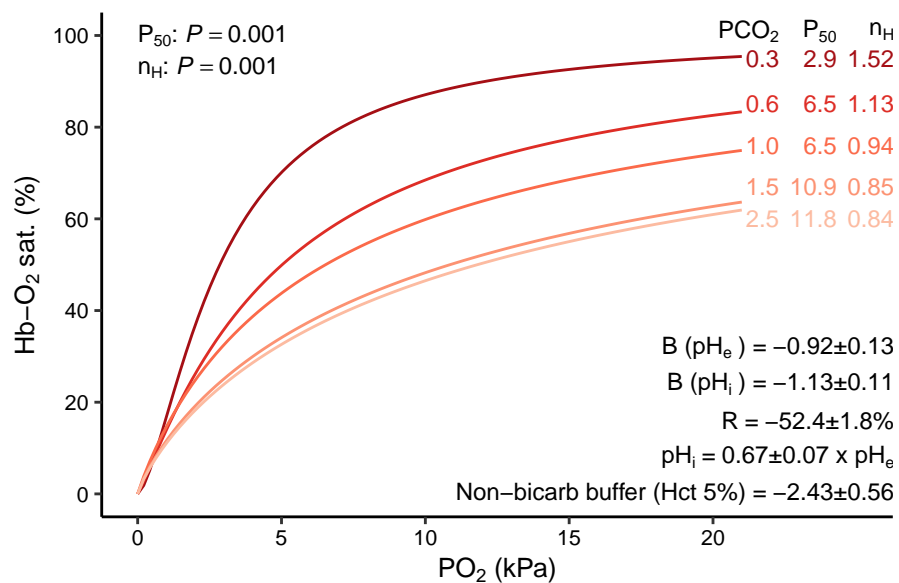

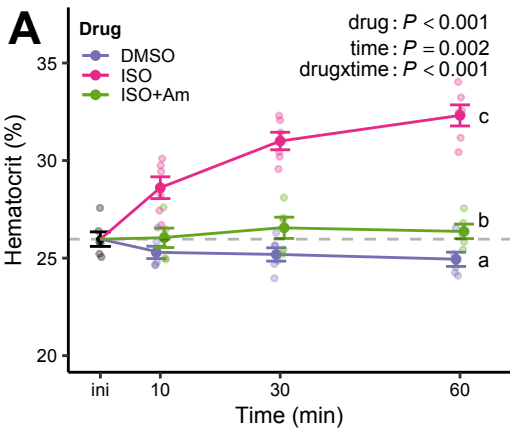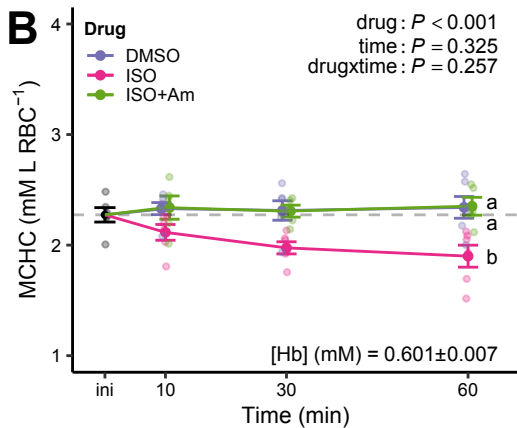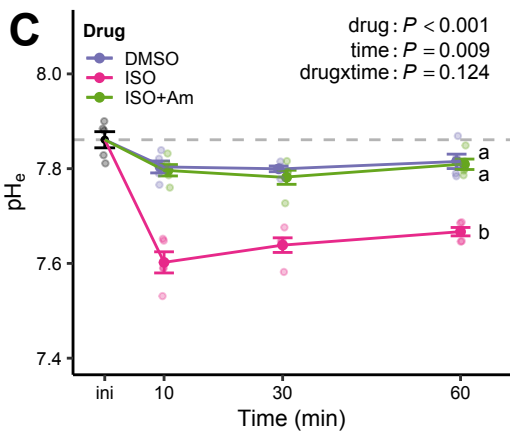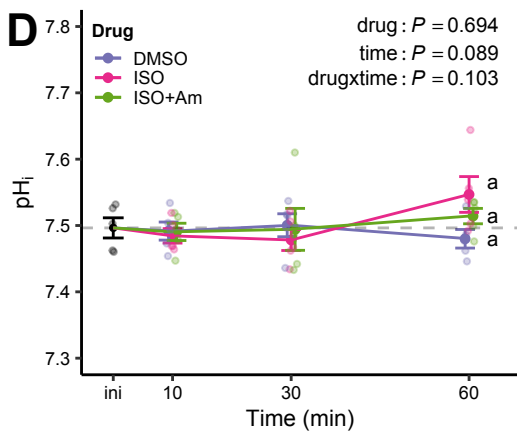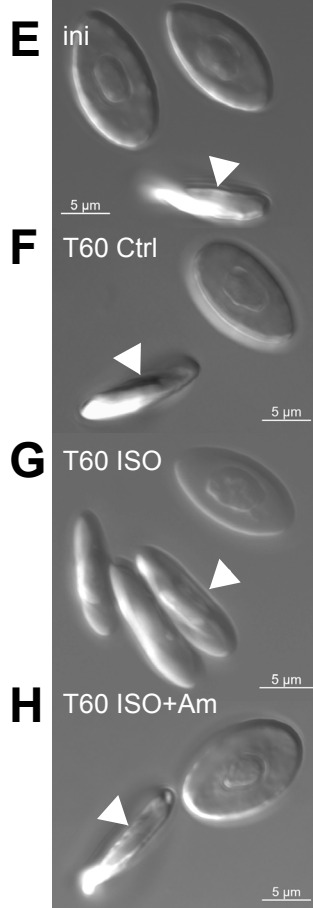



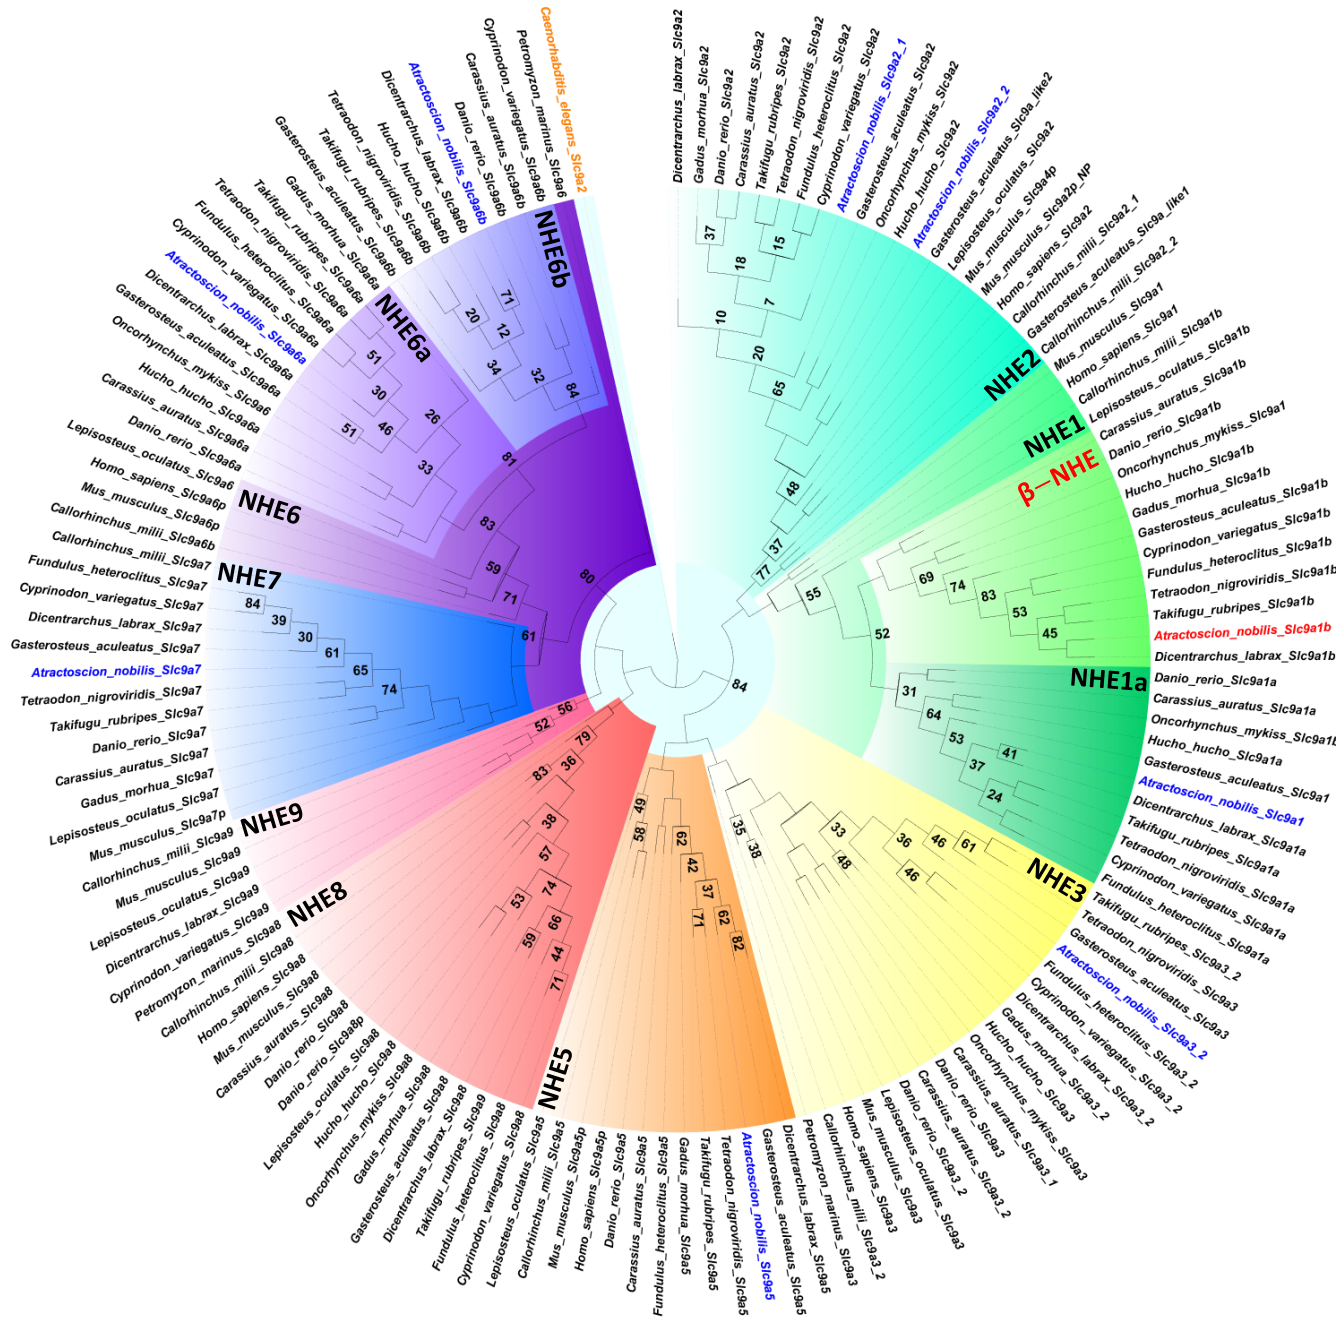



Ctrl

A

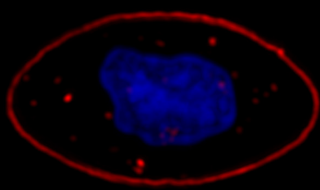

2  $\mu$ m

B

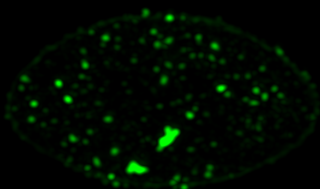

2  $\mu$ m

C

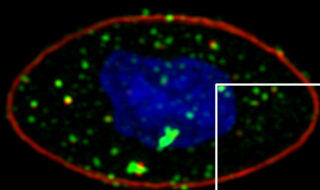

2  $\mu$ m

D

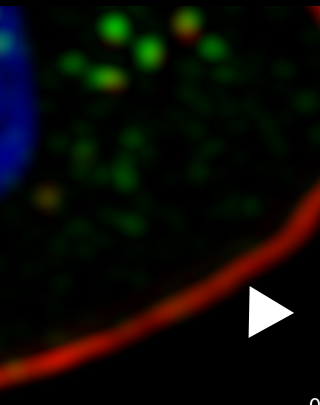

0.5  $\mu$ m

ISO

E

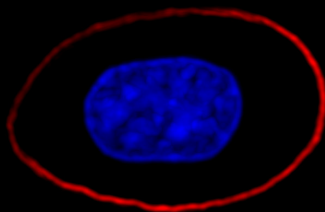

Nucleus  
 $\alpha$ -tubulin

2  $\mu$ m

F

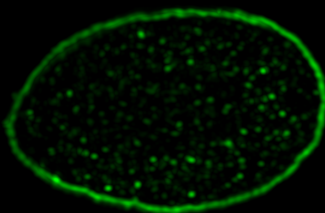

$\beta$ -NHE

2  $\mu$ m

G

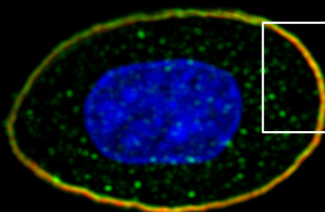

Merged

2  $\mu$ m

H

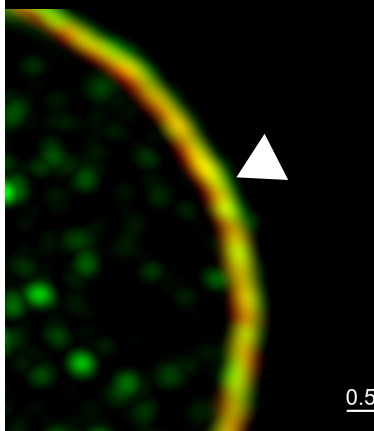

0.5  $\mu$ m

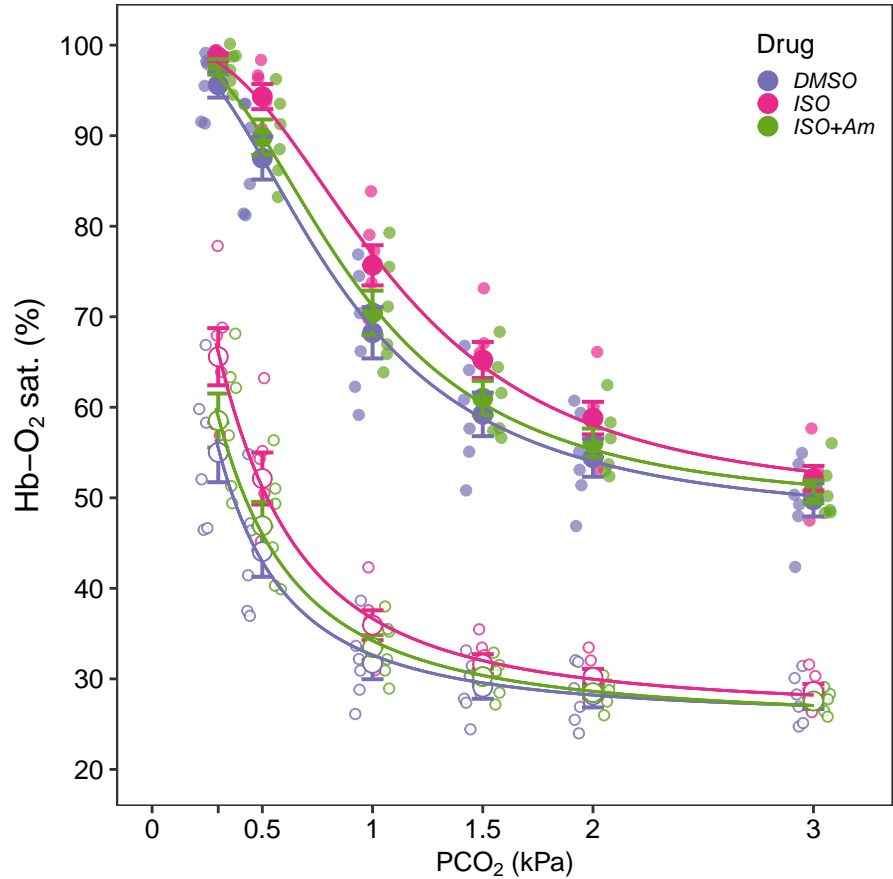

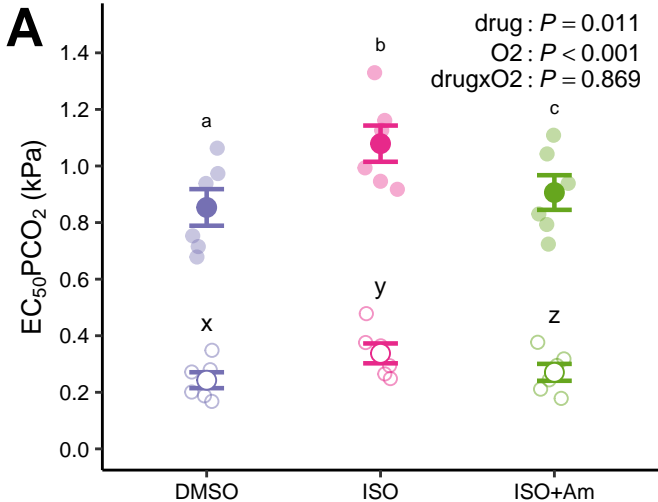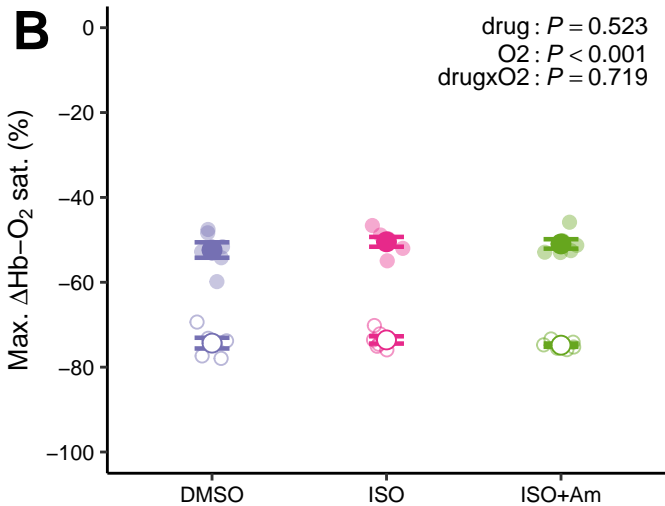

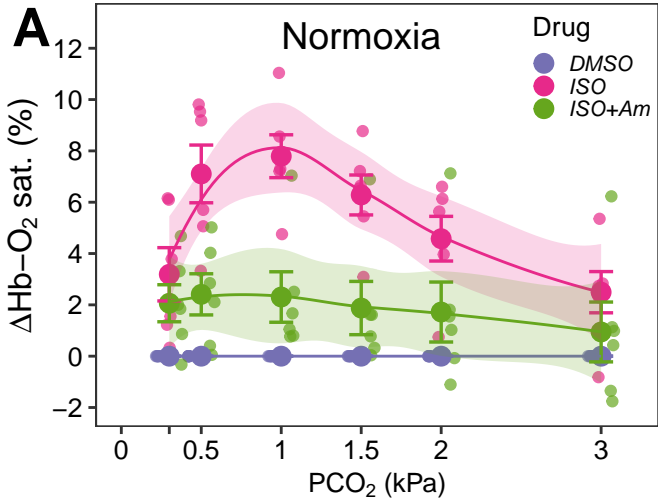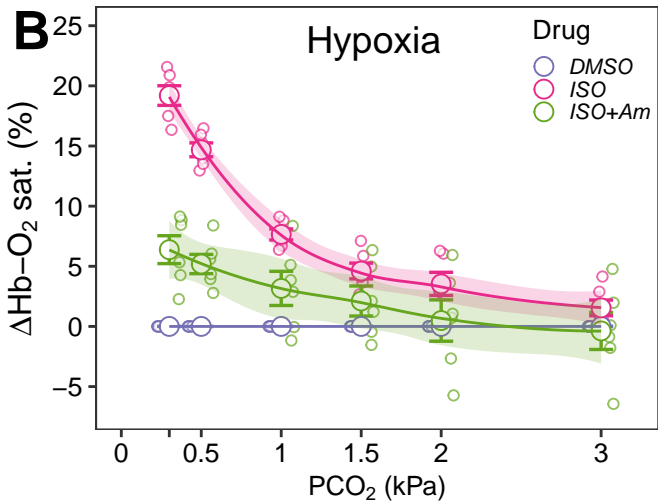

Source: https://www.biorxiv.org/content/10.1101/2021.04.28.441819v2.full.pdf
